# Supplementary material
Source: publisher figshare collection journal article supplement (https://acs.figshare.com/ndownloader/files/21879885)
Supplement: Supplementary file 1 [file 21879885]

## Sheet: Readme
Supporting information
A regionalised life cycle assessment model to globally assess the environmental implications of soil salinisation in irrigated agriculture
Montserrat Núñez*,#,£ and Matthias Finkbeiner#
# Technische Universität Berlin, Chair of Sustainable Engineering, Strasse des 17. Juni 135, 10623 Berlin, Germany
£ GIRO Program, Institute of Agrifood Research and Technology (IRTA), Torre Marimon, E08140 Caldes de Montbuí, Barcelona, Spain
This file contains the following sheets:
#1. SaltLCI tool: tool that calculates, at quilibrium, the accumulation of salts (i.e. salts not flushed from the soil by water) in an irrigated agricultural soil as a a function of the cultural practices applied.
#2. SaltLCI tool: input data about salt concentration in irrigation water (TDS) to the SaltLCI tool, including uncertainty estimates
#3. SaltLCI tool: input data about irrigation water volumes per crop and country, irrigation technologies and soil salinisation control strategies to the SaltLCI tool
#4. Midpoint level characterisation factors under frequent irrigation (FI) aggregated to sub-countries
#5. Midpoint level characterisation factors under infrequent irrigation (II) aggregated to sub-countries
#6. Damage level characterisation factors under frequent irrigation (FI) aggregated to sub-countries
#7. Damage level characterisation factors under infrequent irrigation (II) aggregated to sub-countries
#8. Midpoint level characterisation factors under frequent irrigation (FI) aggregated to countries
#9. Midpoint level characterisation factors under infrequent irrigation (II) aggregated to countries
#10. Damage level characterisation factors under frequent irrigation (FI) aggregated to countries
#11. Damage level characterisation factors under infrequent irrigation (II) aggregated to countries
#12. CFs aggregated at global scale

## Sheet: #1.SaltLCI tool
Default scenario by country (tier 1)
Country (select from the drop-down list):	Spain		Crop (select from the drop-down list):	rice
RowNr:	130		ColumnNr:	2
Humid/Arid country, default:	arid
Country's human development index:	0.891
Salt emission, gross (g salt/kg yield):	376.391
Irrigation technol., field application efficiency (ea):	0.764685
Salt emission, irr. technol. corrected (g salt/kg yield):	492.217
Leaching fraction (LF), default:	0.235315
Salt not flushed from soil (ie, salt added) after LF (g salt/kg yield):	738.325
Presence (y)/Absence (n) drainage system (D), default:	y
Drainage system, binary code:	1
Salt not flushed from soil (ie, salt added) after LF and D (g salt/kg yield):	738.325
LCI elementary flow (g salt added to soil/kg yield):	738.325
Characterisation factor to use: frequent irr. (FI)/infreq irr. (II)	II
Tailored scenario, country scale (tier 2)
Country (select from the drop-down list):	Spain		Crop (select from the drop-down list):	rice
RowNr:	130		ColumnNr:	2
Humid/arid, yearly average:	arid
Salt emission, gross (g salt/kg yield):	376.391
Irrigation technology:	Rice
Irrigation technol., field application efficiency (ea):	0.32
Salt emission, irr. technol. corrected (g salt/kg yield):	1176.22
Leaching fraction (LF), default:	0.68
Salt not flushed from soil (ie, salt added) after LF (g salt/kg yield):	823.354
Presence (y)/Absence (n) drainage system (D):	y
Drainage system, binary code:	1
Salt not flushed from soil (ie, salt added) after LF and D (g salt/kg yield):	823.354
LCI elementary flow (g salt added to soil/kg yield):	823.354
Characterisation factor to use: frequent irr. (FI)/infreq irr. (II)	II
Tailored scenario, any spatial scale (tier 3)
Location	0.71/40.77
Humid/arid, yearly average:	arid
Irrigation water applied on field (l. water/kg yield)	1155
Total dissolved salts (TDS) in irrigation water (mg/l.)	800
Salt emission, gross (g salt/kg yield):	924
Leaching fraction (LF):	0.3
Salt not flushed from soil (ie, salt added) after LF (g salt/kg yield):	1386
Presence (y)/Absence (n) drainage system (D):	y
Drainage system, binary code:	1
Salt not flushed from soil (ie, salt added) after LF and D (g salt/kg yield):	1386
LCI elementary flow (g salt added to soil/kg yield):	1386
Characterisation factor to use: frequent irr. (FI)/infreq irr. (II)	FI

## Sheet: #2.SaltLCI-raw data, TDS
ISOcode	Country	General descriptors - Salt concentration in surface water, mg/L.																	General descriptors - Salt concentration in groundwater, mg/L.
		Mean	Standard Error	Median	Mode	Standard Deviation	Sample Variance	Kurtosis	Skewness	Range	Minimum	Maximum	Sum	Count	Confidence Level(95.0%)	2.5th	97.5th	Probability distribution function	Mean	Standard Error	Median	Mode	Standard Deviation	Sample Variance	Kurtosis	Skewness	Range	Minimum	Maximum	Sum	Count	Confidence Level(95.0%)	2.5th	97.5th	Probability distribution function
AFG	Afghanistan	-	-	247.391	-	-	-	-	-	-	-	-	-	-	-	-	-	-	647.836	20.0373	582.4	389.12	305.857	93548.3	1.58642	1.25234	1625.6	172.8	1798.4	150946	233	39.4784	232.32	1463	log-normal µ: 6.372 sigma: 0.450
ALB	Albania																		-	-	-	-	-	-	-	-	-	-	-	-	-	-	-	-	-
DZA	Algeria	-	-	-	-	-	-	-	-	-	-	-	-	-	-	-	-	-	-	-	-	-	-	-	-	-	-	-	-	-	-	-	-	-	-
AGO	Angola	-	-	-	-	-	-	-	-	-	-	-	-	-	-	-	-	-	-	-	-	-	-	-	-	-	-	-	-	-	-	-	-	-	-
ARG	Argentina	130.073	4.3556	123.52	32	126.612	16030.7	22.4249	4.02223	1019.84	12.16	1032	109912	845	8.54908	18.56	381.4	-	716.326	45.3005	473.6	450	522.431	272934	0.363416	1.46064	1664	256	1920	95271.4	133	89.6089	318	1920	-
ARM	Armenia	-	-	-	-	-	-	-	-	-	-	-	-	-	-	-	-	-	-	-	-	-	-	-	-	-	-	-	-	-	-	-	-	-	-
AUS	Australia	392.679	8.69611	373.76	344.32	70.6475	4991.07	1.09508	1.17618	319.36	279.04	598.4	25916.8	66	17.3673	285.44	564,48	GEV k: 0.060 beta: 50.541 µ: 360.224	-	-	879.894	-	-	-	-	-	-	-	-	-	-	-	-	-	-
AUT	Austria	207.509	7.336	208	167.68	54.8976	3013.75	-0.415285	-0.101664	242.432	76.288	318.72	11620.5	56	14.7017	76.288	311.68	log-normal µ: 5.292 sigma: 0.291	-	-	489.667	-	-	-	-	-	-	-	-	-	-	-	-	-	-
AZE	Azerbaijan	-	-	-	-	-	-	-	-	-	-	-	-	-	-	-	-	-	-	-	-	-	-	-	-	-	-	-	-	-	-	-	-	-	-
BGD	Bangladesh	134.042	6.8078	121.6	83.2	58.9572	3475.96	4.12096	1.52371	308.48	62.72	371.2	10053.1	75	13.5648	64	220.8	log-normal µ: 4.821 sigma: 0.405	603.221	34.2219	464	150.4	439.589	193238	-0.013393	0.936205	1879.59	2.01	1881.6	99531.5	165	67.5724	144	1664	gama(2) k: 1.85 beta: 320.345
BLR	Belarus	-	-	-	-	-	-	-	-	-	-	-	-	-	-	-	-	-	-	-	-	-	-	-	-	-	-	-	-	-	-	-	-	-	-
BEL	Belgium	570.151	4.28023	516.48	561.28	334.735	112047	2.53367	1.43334	1898.24	21.76	1920	3.48705e+06	6116	8.39075	86.4	1497.6	-	-	-	1215.88
BLZ	Belize	-	-	-	-	-	-	-	-	-	-	-	-	-	-	-	-	-	-	-	-	-	-	-	-	-	-	-	-	-	-	-	-	-	-
BEN	Benin	-	-	-	-	-	-	-	-	-	-	-	-	-	-	-	-	-	-	-	-	-	-	-	-	-	-	-	-	-	-	-	-	-	-
BTN	Bhutan	-	-	-	-	-	-	-	-	-	-	-	-	-	-	-	-	-	-	-	-	-	-	-	-	-	-	-	-	-	-	-	-	-	-
BOL	Bolivia	252.309	34.0135	116	50	317.257	100652	3.95578	2.0791	1415	9	1424	21950.9	87	67.6166	11	1234	log-normal µ: 4.857 sigma: 1.214	-	-	273.084	-	-	-	-	-	-	-	-	-	-	-	-	-	-
BIH	Bosnia and Herzegovina	-	-	-	-	-	-	-	-	-	-	-	-	-	-	-	-	-	-	-	-	-	-	-	-	-	-	-	-	-	-	-	-	-	-
BWA	Botswana	-	-	-	-	-	-	-	-	-	-	-	-	-	-	-	-	-	-	-	-	-	-	-	-	-	-	-	-	-	-	-	-	-	-
BRA	Brazil	52.8166	1.12063	33.28	29.44	84.5461	7148.04	100.724	8.12565	1766.4	0	1766.4	300632	5692	2.19686	4.46	232	-	-	-	78.3468	-	-	-	-	-	-	-	-	-	-	-	-	-	-
BRN	Brunei	-	-	-	-	-	-	-	-	-	-	-	-	-	-	-	-	-	-	-	-	-	-	-	-	-	-	-	-	-	-	-	-	-	-
BGR	Bulgaria	-	-	-	-	-	-	-	-	-	-	-	-	-	-	-	-	-	-	-	-	-	-	-	-	-	-	-	-	-	-	-	-	-	-
BFA	Burkina Faso	-	-	-	-	-	-	-	-	-	-	-	-	-	-	-	-	-	-	-	-	-	-	-	-	-	-	-	-	-	-	-	-	-	-
BDI	Burundi	-	-	-	-	-	-	-	-	-	-	-	-	-	-	-	-	-	-	-	-	-	-	-	-	-	-	-	-	-	-	-	-	-	-
KHM	Cambodia	16.9226	1.00546	8.256	7.232	31.2018	973.553	101.316	7.37145	561.907	1.2928	563.2	16296.4	963	1.97316	2.688	104.32	-	-	-	19.436	-	-	-	-	-	-	-	-	-	-	-	-	-	-
CMR	Cameroon	-	-	-	-	-	-	-	-	-	-	-	-	-	-	-	-	-	-	-	-	-	-	-	-	-	-	-	-	-	-	-	-	-	-
CAN	Canada	194.754	1.825	154	2	137.021	18774.6	17.906	2.56352	1919	1	1920	1.09783e+06	5637	3.57769	2	490	-	-	-	362.542	-	-	-	-	-	-	-	-	-	-	-	-	-	-
CAF	Central African Republic	-	-	-	-	-	-	-	-	-	-	-	-	-	-	-	-	-	-	-	-	-	-	-	-	-	-	-	-	-	-	-	-	-	-
TCD	Chad	-	-	-	-	-	-	-	-	-	-	-	-	-	-	-	-	-	-	-	-	-	-	-	-	-	-	-	-	-	-	-	-	-	-
CHL	Chile	-	-	-	-	-	-	-	-	-	-	-	-	-	-	-	-	-	-	-	-	-	-	-	-	-	-	-	-	-	-	-	-	-	-
CHN	China	167.617	4.76112	119.04	41.6	146.67	21512.2	4.3812	1.9489	991.36	15.36	1006.72	159069	949	9.34356	33.28	576	-	-	-	280.24	-	-	-	-	-	-	-	-	-	-	-	-	-	-
COL	Colombia	101.686	1.72958	79.04	88.96	96.0035	9216.68	21.4609	3.54395	1182.6	1.3952	1184	313294	3081	3.39125	11.648	365.44	-	-	-	186.074	-	-	-	-	-	-	-	-	-	-	-	-	-	-
COG	Congo (Republic of the)	-	-	-	-	-	-	-	-	-	-	-	-	-	-	-	-	-	-	-	-	-	-	-	-	-	-	-	-	-	-	-	-	-	-
COD	Congo (Democratic Republic of the)	-	-	-	-	-	-	-	-	-	-	-	-	-	-	-	-	-	-	-	-	-	-	-	-	-	-	-	-	-	-	-	-	-	-
CRI	Costa Rica	-	-	-	-	-	-	-	-	-	-	-	-	-	-	-	-	-	-	-	-	-	-	-	-	-	-	-	-	-	-	-	-	-	-
CIV	Cote d'Ivoire	-	-	-	-	-	-	-	-	-	-	-	-	-	-	-	-	-	-	-	-	-	-	-	-	-	-	-	-	-	-	-	-	-	-
HRV	Croatia	-	-	-	-	-	-	-	-	-	-	-	-	-	-	-	-	-	-	-	-	-	-	-	-	-	-	-	-	-	-	-	-	-	-
CUB	Cuba	189.943	35.446	135.68	396.8	132.627	17589.9	-0.826431	1.0303	346.24	76.16	422.4	2659.2	14	76.5764	<20 counts	< 20 counts	Erlang k: 2.000 lambda: 0.011	403.68	60.0563	457.6	#N/A	120.113	14427	3.89562	-1.9672	251.52	224	475.52	1614.72	4	191.126	<20counts	<20 counts	-
CYP	Cyprus	-	-	-	-	-	-	-	-	-	-	-	-	-	-	-	-	-	-	-	-	-	-	-	-	-	-	-	-	-	-	-	-	-	-
CZE	Czech Republic	-	-	-	-	-	-	-	-	-	-	-	-	-	-	-	-	-	-	-	-	-	-	-	-	-	-	-	-	-	-	-	-	-	-
DNK	Denmark	252.283	6.18468	211.84	160	99.9166	9983.33	-0.663295	0.818262	496	6.4	502.4	65845.8	261	12.1784	156.16	454.4	-	-	-	498.707	-	-	-	-	-	-	-	-	-	-	-	-	-	-
DJI	Djibouti	-	-	-	-	-	-	-	-	-	-	-	-	-	-	-	-	-	-	-	-	-	-	-	-	-	-	-	-	-	-	-	-	-	-
DOM	Dominican Republic	-	-	-	-	-	-	-	-	-	-	-	-	-	-	-	-	-	-	-	-	-	-	-	-	-	-	-	-	-	-	-	-	-	-
ECU	Ecuador	40.1642	1.5194	40	#N/A	7.28678	53.0971	2.35123	0.801162	35.456	26.112	61.568	923.776	23	3.15104	26.112	46.976	log-normal µ: 3.678 sigma: 0.174	-	-	94.1668	-	-	-	-	-	-	-	-	-	-	-	-	-	-
EGY	Egypt	-	-	-	-	-	-	-	-	-	-	-	-	-	-	-	-	-	-	-	-	-	-	-	-	-	-	-	-	-	-	-	-	-	-
SLV	El Salvador	-	-	-	-	-	-	-	-	-	-	-	-	-	-	-	-	-	-	-	-	-	-	-	-	-	-	-	-	-	-	-	-	-	-
GNQ	Equatorial Guinea	-	-	-	-	-	-	-	-	-	-	-	-	-	-	-	-	-	-	-	-	-	-	-	-	-	-	-	-	-	-	-	-	-	-
ERI	Eritrea	-	-	-	-	-	-	-	-	-	-	-	-	-	-	-	-	-	-	-	-	-	-	-	-	-	-	-	-	-	-	-	-	-	-
EST	Estonia	-	-	-	-	-	-	-	-	-	-	-	-	-	-	-	-	-	-	-	-	-	-	-	-	-	-	-	-	-	-	-	-	-	-
ETH	Ethiopia	-	-	-	-	-	-	-	-	-	-	-	-	-	-	-	-	-	-	-	-	-	-	-	-	-	-	-	-	-	-	-	-	-	-
FIN	Finland	32.9109	0.539461	26.88	18.56	14.119	199.347	0.695938	0.864138	99.328	11.392	110.72	22543.9	685	1.0592	23.68	38.08		-	-	63.2801	-	-	-	-	-	-	-	-	-	-	-	-	-	-
FRA	France	208.599	2.09482	209.28	153.6	80.8067	6529.72	-0.222668	-0.126505	473.47	3.33	476.8	310396	1488	4.10911	17.92	347.52	normal µ: 208.599 sigma: 80.780	-	-	492.681	-	-	-	-	-	-	-	-	-	-	-	-	-	-
GUF	French Guiana	-	-	-	-	-	-	-	-	-	-	-	-	-	-	-	-	-	-	-	-	-	-	-	-	-	-	-	-	-	-	-	-	-	-
GAB	Gabon	-	-	-	-	-	-	-	-	-	-	-	-	-	-	-	-	-	-	-	-	-	-	-	-	-	-	-	-	-	-	-	-	-	-
GEO	Georgia	-	-	-	-	-	-	-	-	-	-	-	-	-	-	-	-	-	-	-	-	-	-	-	-	-	-	-	-	-	-	-	-	-	-
DEU	Germany	546.976	6.79301	512	230.4	274.34	75262.5	3.13662	1.32668	1864.32	17.28	1881.6	892117	1631	13.324	172.8	1203.2	Fisher-Tippett(2) beta: 210.245 µ: 425.579	-	-	1205.33	-	-	-	-	-	-	-	-	-	-	-	-	-	-
GHA	Ghana	131.563	42.2439	73.28	#N/A	179.226	32121.8	14.0626	3.62102	773.12	40.96	814.08	2368.13	18	89.1268	<20 counts	< 20 counts	log-normal µ: 4.500 sigma: 0.729	-	-	172.514	-	-	-	-	-	-	-	-	-	-	-	-	-	-
GRC	Greece	262.788	3.91494	256	211.2	78.1028	6100.04	7.03632	1.79778	652.8	96	748.8	104589	398	7.6966	134.4	448	log-normal µ: 5.532 sigma: 0.277	-	-	602.667	-	-	-	-	-	-	-	-	-	-	-	-	-	-
GTM	Guatemala	181.068	2.14295	157.44	289.92	105.266	11081	3.01438	1.11205	922.37	4	926.37	436917	2413	4.20221	39.68	400	log-normal µ: 5.482 sigma: 0.584	-	-	370.64	-	-	-	-	-	-	-	-	-	-	-	-	-	-
GIN	Guinea	-	-	-	-	-	-	-	-	-	-	-	-	-	-	-	-	-	-	-	-	-	-	-	-	-	-	-	-	-	-	-	-	-	-
GNB	Guinea-Bissau	-	-	-	-	-	-	-	-	-	-	-	-	-	-	-	-	-	-	-	-	-	-	-	-	-	-	-	-	-	-	-	-	-	-
GUY	Guyana	-	-	-	-	-	-	-	-	-	-	-	-	-	-	-	-	-	-	-	-	-	-	-	-	-	-	-	-	-	-	-	-	-	-
HTI	Haiti	-	-	-	-	-	-	-	-	-	-	-	-	-	-	-	-	-	-	-	-	-	-	-	-	-	-	-	-	-	-	-	-	-	-
HND	Honduras	-	-	-	-	-	-	-	-	-	-	-	-	-	-	-	-	-	-	-	-	-	-	-	-	-	-	-	-	-	-	-	-	-	-
HUN	Hungary	291.585	5.38945	275.52	256	71.4991	5112.12	-1.27306	0.200976	265.6	140.8	406.4	51319	176	10.6367	190.72	400	-	630.4	33.204	601.6	601.6	66.408	4410.03	3.84664	1.94956	140.8	588.8	729.6	2521.6	4	105.67	<20counts	<20 counts	log-normal µ: 6.442 sigma: 0.087
IND	India	209.713	2.69771	149.76	0	266.364	70949.8	11.0207	3.00606	1920	0	1920	2.04449e+06	9749	5.28807	2.56	1144	-	392.135	8.52136	185.6	0	413.966	171368	-0.207455	0.95925	1913.6	0	1913.6	925438	2360	16.7101	0	1280	-
IDN	Indonesia	-	-	-	-	-	-	-	-	-	-	-	-	-	-	-	-	-
IRN	Iran	-	-	110.918	-	-	-	-	-	-	-	-	-	-	-	-	-	-	258.065	11.8345	261.12	261.12	55.5086	3081.2	3.78821	-1.31499	273.92	84.48	358.4	5677.44	22	24.6111	84.48	322.56	log-normal µ: 5.522 sigma: 0.280
IRQ	Iraq	-	-	-	-	-	-	-	-	-	-	-	-	-	-	-	-	-	-	-	-	-	-	-	-	-	-	-	-	-	-	-	-	-	-
IRL	Ireland	294.541	5.07	335.36	137.6	93.0729	8662.56	-0.676534	-0.942144	327.68	78.72	406.4	99260.2	337	9.97295	112	388.48	-	-	-	789.494	-	-	-	-	-	-	-	-	-	-	-	-	-	-
ISR	Israel																		-	-	-	-	-	-	-	-	-	-	-	-	-	-	-	-	-
ITA	Italy	282.741	4.97738	256	262.4	148.573	22073.9	14.251	2.87004	1523.84	76.16	1600	251922	891	9.76876	103.68	684.8	-	-	-	602.667	-	-	-	-	-	-	-	-	-	-	-	-	-	-
JAM	Jamaica																		-	-	-	-	-	-	-	-	-	-	-	-	-	-	-	-	-
JPN	Japan	97.7671	0.659202	85.76	50.56	51.7967	2682.9	1.94614	1.35908	464.64	21.76	486.4	603614	6174	1.29227	36.48	232.96	-	97.7438	1.67412	80	79.36	32.1589	1034.19	-0.64476	1.11425	101.12	69.12	170.24	36067.5	369	3.29205	71.68	162.56	-
JOR	Jordan	568.32	50.0887	512	288	260.268	67739.6	-1.45801	0.250821	854.4	169.6	1024	15344.6	27	102.959	169.6	960	Weibull(2) beta: 4.351 gamma: 1236.096	1120	95.8059	1248	960	317.752	100966	-0.982703	-0.280129	1024	576	1600	12320	11	213.469	<20 counts	<20counts	log-normal µ: 6.231 sigma: 0.487
KAZ	Kazakhstan	-	-	-	-	-	-	-	-	-	-	-	-	-	-	-	-	-	-	-	-	-	-	-	-	-	-	-	-	-	-	-	-	-	-
KEN	Kenya	-	-	-	-	-	-	-	-	-	-	-	-	-	-	-	-	-	-	-	-	-	-	-	-	-	-	-	-	-	-	-	-	-	-
KWT	Kuwait	-	-	-	-	-	-	-	-	-	-	-	-	-	-	-	-	-	-	-	-	-	-	-	-	-	-	-	-	-	-	-	-	-	-
KGZ	Kyrgyzstan	-	-	-	-	-	-	-	-	-	-	-	-	-	-	-	-	-	-	-	-	-	-	-	-	-	-	-	-	-	-	-	-	-	-
LAO	Laos	95.396	2.31369	76.8	15.744	84.8529	7200.01	1.56038	1.1449	626.368	5.312	631.68	128308	1345	4.53884	9.35	307.2	-	-	-	180.8	-	-	-	-	-	-	-	-	-	-	-	-	-	-
LVA	Latvia	-	-	-	-	-	-	-	-	-	-	-	-	-	-	-	-	-	-	-	-	-	-	-	-	-	-	-	-	-	-	-	-	-	-
LBN	Lebanon	-	-	-	-	-	-	-	-	-	-	-	-	-	-	-	-	-	-	-	-	-	-	-	-	-	-	-	-	-	-	-	-	-	-
LSO	Lesotho	-	-	-	-	-	-	-	-	-	-	-	-	-	-	-	-	-	-	-	-	-	-	-	-	-	-	-	-	-	-	-	-	-	-
LBR	Liberia	-	-	-	-	-	-	-	-	-	-	-	-	-	-	-	-	-	-	-	-	-	-	-	-	-	-	-	-	-	-	-	-	-	-
LBY	Libya	-	-	-	-	-	-	-	-	-	-	-	-	-	-	-	-	-	-	-	-	-	-	-	-	-	-	-	-	-	-	-	-	-	-
LTU	Lithuania	-	-	-	-	-	-	-	-	-	-	-	-	-	-	-	-	-	-	-	-	-	-	-	-	-	-	-	-	-	-	-	-	-	-
LUX	Luxembourg	321.086	9.02744	319.04	195.2	78.6994	6193.59	-0.328155	-0.0456166	358.4	134.4	492.8	24402.6	76	17.9836	179.84	480	normal µ: 321.086 sigma: 78.180	-	-	751.074	-	-	-	-	-	-	-	-	-	-	-	-	-	-
MKD	Macedonia	-	-	-	-	-	-	-	-	-	-	-	-	-	-	-	-	-	-	-	-	-	-	-	-	-	-	-	-	-	-	-	-	-	-
MDG	Madagascar	-	-	-	-	-	-	-	-	-	-	-	-	-	-	-	-	-	-	-	-	-	-	-	-	-	-	-	-	-	-	-	-	-	-
MWI	Malawi	-	-	-	-	-	-	-	-	-	-	-	-	-	-	-	-	-	-	-	-	-	-	-	-	-	-	-	-	-	-	-	-	-	-
MYS	Malaysia	-	-	-	-	-	-	-	-	-	-	-	-	-	-	-	-	-	-	-	-	-	-	-	-	-	-	-	-	-	-	-	-	-	-
MLI	Mali	27.3108	0.731387	28.8	33.28	5.27411	27.8162	-0.975066	-0.56393	17.92	16.64	34.56	1420.16	52	1.46832	16.64	34.56	logistic µ: 27.788 sigma: 3.108	193.428	19.7563	219.52	251.52	100.738	10148.1	1.23056	0.385496	430.08	52.48	482.56	5029.12	26	40.6889	52.48	259.2	logistic µ: 197.524 sigma: 55.136
MRT	Mauritania	-	-	-	-	-	-	-	-	-	-	-	-	-	-	-	-	-	-	-	-	-	-	-	-	-	-	-	-	-	-	-	-	-	-
MEX	Mexico	589.509	10.9372	572.8	448	341.688	116750	-0.210666	0.434684	1920	0	1920	575361	976	21.4631	56	1274	-	822.45	15.1254	807.68	832	182.134	33172.7	1.81843	-0.788938	1083.46	10.944	1094.4	119255	145	29.8965	428.16	1081.6	normal µ: 822.448 sigma: 181.505
MDA	Moldova	-	-	-	-	-	-	-	-	-	-	-	-	-	-	-	-	-	-	-	-	-	-	-	-	-	-	-	-	-	-	-	-	-	-
MNG	Mongolia	-	-	-	-	-	-	-	-	-	-	-	-	-	-	-	-	-	-	-	-	-	-	-	-	-	-	-	-	-	-	-	-	-	-
MAR	Morocco	713.949	10.4667	684.8	960	304.974	93009.1	-0.0267053	0.498981	1849.6	57.6	1907.2	606143	849	20.5436	252.8	1350.4	-	789.109	64.7517	458.88	384	617.691	381543	-0.592774	1.161	1587.2	332.8	1920	71808.9	91	128.64	335.36	1920	-
MOZ	Mozambique	-	-	-	-	-	-	-	-	-	-	-	-	-	-	-	-	-	-	-	-	-	-	-	-	-	-	-	-	-	-	-	-	-	-
MMR	Myanmar (Burma)	-	-	-	-	-	-	-	-	-	-	-	-	-	-	-	-	-	-	-	-	-	-	-	-	-	-	-	-	-	-	-	-	-	-
NAM	Namibia	-	-	-	-	-	-	-	-	-	-	-	-	-	-	-	-	-	-	-	-	-	-	-	-	-	-	-	-	-	-	-	-	-	-
NPL	Nepal	-	-	-	-	-	-	-	-	-	-	-	-	-	-	-	-	-	-	-	-	-	-	-	-	-	-	-	-	-	-	-	-	-	-
NLD	Netherlands	445.485	5.37639	448	550.4	136.225	18557.4	-0.545236	0.110514	742.4	153.6	896	286001	642	10.5575	198.4	704	Weibull(2) beta: 3.630 gamma: 494.675	-	-	1054.67	-	-	-	-	-	-	-	-	-	-	-	-	-	-
NZL	New Zealand	71.5027	0.40218	55.04	97.28	55.6289	3094.57	10.4092	3.02714	358.72	11.84	370.56	1.36799e+06	19132	0.788308	25.28	280.32	-	-	-	129.574	-	-	-	-	-	-	-	-	-	-	-	-	-	-
NIC	Nicaragua	-	-	-	-	-	-	-	-	-	-	-	-	-	-	-	-	-	-	-	-	-	-	-	-	-	-	-	-	-	-	-	-	-	-
NER	Niger	-	-	-	-	-	-	-	-	-	-	-	-	-	-	-	-	-	-	-	-	-	-	-	-	-	-	-	-	-	-	-	-	-	-
NGA	Nigeria	-	-	-	-	-	-	-	-	-	-	-	-	-	-	-	-	-	-	-	-	-	-	-	-	-	-	-	-	-	-	-	-	-	-
PRK	Korea, Democratic People's Republic of	-	-	-	-	-	-	-	-	-	-	-	-	-	-	-	-	-	-	-	-	-	-	-	-	-	-	-	-	-	-	-	-	-	-
NOR	Norway	0.411052	0.0159742	0.27136	0.13824	0.351433	0.123505	1.11015	1.55517	1.3696	0.0832	1.4528	198.949	484	0.0313876	0.119	1.293	-	-	-	0.638827	-	-	-	-	-	-	-	-	-	-	-	-	-	-
OMN	Oman	-	-	-	-	-	-	-	-	-	-	-	-	-	-	-	-	-	-	-	-	-	-	-	-	-	-	-	-	-	-	-	-	-	-
PAK	Pakistan	213.971	3.804	192	192	90.4201	8175.8	2.37088	1.14656	595.2	44.8	640	120893	565	7.47174	76.8	448	-	617.863	24.1884	665.6	448	151.057	22818.1	-0.132869	-0.58769	582.4	249.6	832	24096.6	39	48.9669	249.6	832	Weibull(2) beta: 5.028 gamma: 674.767
PAN	Panama	148.45	3.6787	75.52	78.08	223.737	50058	10.0157	3.13739	1698.56	9.6	1708.16	549116	3699	7.21249	23.04	921.6	-	-	-	177.787	-	-	-	-	-	-	-	-	-	-	-	-	-	-
PNG	Papua New Guinea	-	-	-	-	-	-	-	-	-	-	-	-	-	-	-	-	-	-	-	-	-	-	-	-	-	-	-	-	-	-	-	-	-	-
PRY	Paraguay	-	-	-	-	-	-	-	-	-	-	-	-	-	-	-	-	-	-	-	-	-	-	-	-	-	-	-	-	-	-	-	-	-	-
PER	Peru	115.375	10.9401	131.2	#N/A	42.3709	1795.3	-0.810426	0.281564	139.52	61.44	200.96	1730.62	15	23.4642	<20 counts	<20 counts	Weibull(2) beta: 3.113 gamma: 129.394	-	-	308.867	-	-	-	-	-	-	-	-	-	-	-	-	-	-
PHL	Philippines	106.752	19.4041	91.52	#N/A	33.609	1129.56	#DIV/0!	1.62055	61.824	83.456	145.28	320.256	3	83.4893	<20 counts	<20 counts	-	-	-	215.454	-	-	-	-	-	-	-	-	-	-	-	-	-	-
POL	Poland	562.923	6.60143	473.6	416	311.738	97180.8	5.06078	2.15684	1753.6	166.4	1920	1.25532e+06	2230	12.9456	200.96	1606.4	-	158.208	42.5176	175.36	#N/A	95.0722	9038.73	2.60876	-1.51113	244.48	0	244.48	791.04	5	118.048	<20 counts	<20counts	-
PRT	Portugal	144.966	5.21413	96.64	32	132.832	17644.5	1.03099	1.33718	629.12	10.88	640	94083.1	649	10.2386	25.6	472.96	-	-	-	227.507	-	-	-	-	-	-	-	-	-	-	-	-	-	-
PRI	Puerto Rico	-	-	-	-	-	-	-	-	-	-	-	-	-	-	-	-	-	-	-	-	-	-	-	-	-	-	-	-	-	-	-	-	-	-
ROU	Romania	-	-	-	-	-	-	-	-	-	-	-	-	-	-	-	-	-	-	-	-	-	-	-	-	-	-	-	-	-	-	-	-	-	-
RUS	Russia	6.00512	0.598135	0.000128	0.000128	27.6439	764.186	36.5615	5.75466	272	0	272	12826.9	2136	1.17299	0	80.64	-	-	-	0.000301334	-	-	-	-	-	-	-	-	-	-	-	-	-	-
RWA	Rwanda	-	-	-	-	-	-	-	-	-	-	-	-	-	-	-	-	-	-	-	-	-	-	-	-	-	-	-	-	-	-	-	-	-	-
SAU	Saudi Arabia	-	-	-	-	-	-	-	-	-	-	-	-	-	-	-	-	-	-	-	-	-	-	-	-	-	-	-	-	-	-	-	-	-	-
SEN	Senegal	150.122	27.8124	128.64	38.4	133.384	17791.2	3.08012	1.5627	536.32	35.2	571.52	3452.8	23	57.6795	35.2	308.48	log-normal µ: 4.644 sigma: 0.867	900.775	161.655	1068.8	#N/A	582.855	339720	-1.58544	-0.307184	1555.84	31.36	1587.2	11710.1	13	352.216	<20 counts	<20counts	-
SCG	Serbia and Montenegro	-	-	-	-	-	-	-	-	-	-	-	-	-	-	-	-	-	-	-	-	-	-	-	-	-	-	-	-	-	-	-	-	-	-
SLE	Sierra Leone	-	-	-	-	-	-	-	-	-	-	-	-	-	-	-	-	-	-	-	-	-	-	-	-	-	-	-	-	-	-	-	-	-	-
SVK	Slovakia	-	-	-	-	-	-	-	-	-	-	-	-	-	-	-	-	-	-	-	-	-	-	-	-	-	-	-	-	-	-	-	-	-	-
SVN	Slovenia	-	-	-	-	-	-	-	-	-	-	-	-	-	-	-	-	-	-	-	-	-	-	-	-	-	-	-	-	-	-	-	-	-	-
SOM	Somalia	-	-	-	-	-	-	-	-	-	-	-	-	-	-	-	-	-	-	-	-	-	-	-	-	-	-	-	-	-	-	-	-	-	-
ZAF	South Africa	320.994	1.96016	308.48	341.12	231.39	53541.4	18.3085	3.2356	2963.84	18.56	2982.4	4.47305e+06	13935	3.84217	58.24	1102.2	-	-	-	726.214	-	-	-	-	-	-	-	-	-	-	-	-	-	-
KOR	Korea, Republic of	98.6786	0.917925	92.16	67.2	39.4067	1552.89	1.81554	1.07691	291.584	4.096	295.68	181865	1843	1.80028	44.8	192.64	-	-	-	216.96	-	-	-	-	-	-	-	-	-	-	-	-	-	-
ESP	Spain	595.757	11.3782	463.36	787.2	359.81	129463	-0.54055	0.677881	1864.96	10.24	1875.2	595757	1000	22.3279	135.04	1331.2	-	-	-	1090.83	-	-	-	-	-	-	-	-	-	-	-	-	-	-
LKA	Sri Lanka	99.6162	4.65427	44.8	19.2	214.45	45989	28.1461	4.99509	2028.8	0	2028.8	211485	2123	9.12742	12.8	787.2	-	-	-	105.467	-	-	-	-	-	-	-	-	-	-	-	-	-	-
SDN	Sudan	168.237	1.80561	169.6	160	13.2684	176.051	0.846001	0.384108	70.4	140.8	211.2	9084.8	54	3.62159	140.8	192	Weibull(2) beta: 12.199 gamma: 174.424	-	-	399.267	-	-	-	-	-	-	-	-	-	-	-	-	-	-
SUR	Suriname	-	-	-	-	-	-	-	-	-	-	-	-	-	-	-	-	-	-	-	-	-	-	-	-	-	-	-	-	-	-	-	-	-	-
SWZ	Swaziland	-	-	-	-	-	-	-	-	-	-	-	-	-	-	-	-	-	-	-	-	-	-	-	-	-	-	-	-	-	-	-	-	-	-
SWE	Sweden	102.906	6.05656	62.464	65.92	112.496	12655.3	3.42002	2.00998	585.472	14.208	599.68	35502.6	345	11.9125	18.624	430.72	-	-	-	147.051	-	-	-	-	-	-	-	-	-	-	-	-	-	-
CHE	Switzerland	186.829	0.710241	188.8	192.64	32.134	1032.59	0.366994	-0.467898	209.92	62.08	272	382440	2047	1.39287	111.36	244.48	Weibull(2) beta: 188.252 gamma: 17.916	-	-	444.467	-	-	-	-	-	-	-	-	-	-	-	-	-	-
SYR	Syria	-	-	-	-	-	-	-	-	-	-	-	-	-	-	-	-	-	-	-	-	-	-	-	-	-	-	-	-	-	-	-	-	-	-
TJK	Tajikistan	-	-	-	-	-	-	-	-	-	-	-	-	-	-	-	-	-	-	-	-	-	-	-	-	-	-	-	-	-	-	-	-	-	-
TZA	Tanzania, United Republic of	124.808	15.704	85.034	76.8	104.169	10851.1	9.43849	2.98668	524.8	19.2	544	5491.56	44	31.6701	19.2	512	GEV k: 0.253 beta: 40.879 µ: 83.737	480.96	62.8484	585.6	640	198.744	39499.2	-1.11122	-0.946508	473.6	166.4	640	4809.6	10	142.173	19.2	512	Beta(4) alpha: 0.526 beta: 0.342 c: 161.617 d: 644.736
THA	Thailand	169.464	7.77505	100.48	17.28	282.16	79614.5	22.675	4.27573	2707.2	0	2707.2	223184	1317	15.2528	9.28	1037.44	-	-	-	236.547	-	-	-	-	-	-	-	-	-	-	-	-	-	-
GMB	Gambia, The	-	-	-	-	-	-	-	-	-	-	-	-	-	-	-	-	-	-	-	-	-	-	-	-	-	-	-	-	-	-	-	-	-	-
TGO	Togo	-	-	-	-	-	-	-	-	-	-	-	-	-	-	-	-	-	-	-	-	-	-	-	-	-	-	-	-	-	-	-	-	-	-
TTO	Trinidad and Tobago	-	-	-	-	-	-	-	-	-	-	-	-	-	-	-	-	-	-	-	-	-	-	-	-	-	-	-	-	-	-	-	-	-	-
TUN	Tunisia	-	-	-	-	-	-	-	-	-	-	-	-	-	-	-	-	-	-	-	-	-	-	-	-	-	-	-	-	-	-	-	-	-	-
TUR	Turkey	1275.29	11.5567	1256.32	1170	207.056	42872.1	1.81413	-0.318533	1713.4	117	1830.4	409367	321	22.7368	954	1651.2	Gamma(2) k: 30.618 beta: 41.651	-	-	2957.59	-	-	-	-	-	-	-	-	-	-	-	-	-	-
TKM	Turkmenistan	-	-	-	-	-	-	-	-	-	-	-	-	-	-	-	-	-	-	-	-	-	-	-	-	-	-	-	-	-	-	-	-	-	-
UGA	Uganda	-	-	-	-	-	-	-	-	-	-	-	-	-	-	-	-	-	-	-	-	-	-	-	-	-	-	-	-	-	-	-	-	-	-
UKR	Ukraine	-	-	-	-	-	-	-	-	-	-	-	-	-	-	-	-	-	-	-	-	-	-	-	-	-	-	-	-	-	-	-	-	-	-
ARE	United Arab Emirates	-	-	-	-	-	-	-	-	-	-	-	-	-	-	-	-	-	-	-	-	-	-	-	-	-	-	-	-	-	-	-	-	-	-
GBR	United Kingdom	300.011	2.88112	241.92	563.2	211.738	44833	2.0284	1.00764	1920	0	1920	1.62036e+06	5401	5.64816	30.208	742.4	-	-	-	569.521	-	-	-	-	-	-	-	-	-	-	-	-	-	-
USA	United States	352.184	2.19161	242	80	377.346	142390	14.8061	3.32102	2990	0	2990	1.04405e+07	29645	4.29566	45.44	1470	-	-	-	569.709	-	-	-	-	-	-	-	-	-	-	-	-	-	-
URY	Uruguay	-	-	-	-	-	-	-	-	-	-	-	-	-	-	-	-	-	-	-	-	-	-	-	-	-	-	-	-	-	-	-	-	-	-
UZB	Uzbekistan	-	-	-	-	-	-	-	-	-	-	-	-	-	-	-	-	-	-	-	-	-	-	-	-	-	-	-	-	-	-	-	-	-	-
VEN	Venezuela	-	-	-	-	-	-	-	-	-	-	-	-	-	-	-	-	-	-	-	-	-	-	-	-	-	-	-	-	-	-	-	-	-	-
VNM	Vietnam	239.248	6.38222	102.08	82.56	353.162	124724	5.92566	2.45817	1915.39	4.608	1920	732578	3062	12.5139	6.72	1369.6	-	-	-	240.314	-	-	-	-	-	-	-	-	-	-	-	-	-	-
WES	Vanuatu	-	-	-	-	-	-	-	-	-	-	-	-	-	-	-	-	-	-	-	-	-	-	-	-	-	-	-	-	-	-	-	-	-	-
YEM	Yemen	-	-	-	-	-	-	-	-	-	-	-	-	-	-	-	-	-	-	-	-	-	-	-	-	-	-	-	-	-	-	-	-	-	-
ZMB	Zambia	-	-	-	-	-	-	-	-	-	-	-	-	-	-	-	-	-	-	-	-	-	-	-	-	-	-	-	-	-	-	-	-	-	-
ZWE	Zimbabwe	72.6281	1.54617	66.756	69	13.8294	191.252	-0.716429	1.02164	39.776	60.224	100	5810.25	80	3.07758	60.352	98	-	-	-	157.155	-	-	-	-	-	-	-	-	-	-	-	-	-	-
		Salt content in groundwater, median	Salt content in surface water, median	SW/GW
ARG	Argentina	473.6	123.52	0.260811
BGD	Bangladesh	464	121.6	0.262069
CUB	Cuba	457.6	135.68	0.296503
HUN	Hungary	601.6	275.52	0.457979
IND	India	185.6	149.76	0.806897
JPN	Japan	80	85.76	1.072
JOR	Jordan	1248	512	0.410256
MLI	Mali	219.52	28.8	0.131195
MEX	Mexico	807.68	572.8	0.709192
MAR	Morocco	458.88	684.8	1.49233
TZA	Tanzania, United Republic of	585.6	85.034	0.145208
PKA	Pakistan	665.6	192	0.288462
POL	Poland	175.36	473.6	2.70073
SEN	Senegal	1068.8	128.64	0.120359
			Geom. Mean	0.424778

## Sheet: #3.SaltLCIraw data,S_input,LF,D
ISOcode	Country	Arid area, %	Humid area, %	Arid area, Irrigation expected (m3 water/10^3kg yield)
				wheat	rice	barley	maize	rye	oats	millet	sorghum	buckwheat	quinoa	fonio	triticale	canaryseed	mixedgrain	cerealnes	potato	sweetpotatoe	cassava	yautia	taro	yam	rootnes	sugarcane	sugarbeet	sugarnes	bean	broadbean	pea	chickpea	cowpea	pigeonpea	lentil	bambara	vetch	lupin	pulsenes	cashew	chestnut	almond	walnut	pistachio	kolanut	hazelnut	areca	nutnes	soybean
AFG	Afghanistan	0.900889	0.0991111	933.648	3222.44	937.251	2805.03	No production	No production	3142.91	No production	No production	No production	No production	No production	No production	No production	No production	156.081	No production	No production	No production	No production	No production	No production	106.421	557.679	No production	4056.56	No production	1530.44	1024.14	No production	No production	8929.13	No production	No production	No production	976.599	No production	No production	11992.1	4676.56	No production	No production	No production	No production	No production	5421.91
ALB	Albania	0	1	89.4599	327.122	267.21	798.29	494.335	207.164	No production	No production	No production	No production	No production	No production	No production	No production	No production	138.467	No production	No production	No production	No production	No production	No production	No production	59.5141	No production	2376.33	9.90727	306.877	No production	96.9625	No production	No production	No production	4428.6	No production	4374.24	No production	21.8725	22.9429	581.394	19.672	No production	25.5924	No production	2690.77	2107.41
DZA	Algeria	0.99753	0.00246978	301.049	No production	292.498	380.727	No production	430.013	No production	250.457	No production	No production	No production	0	No production	No production	186.157	87.2998	No production	No production	No production	No production	No production	No production	No production	12.1616	No production	No production	1958.2	1963.19	690.009	No production	No production	754.383	No production	No production	No production	164.43	No production	No production	995.121	No production	10465.5	No production	No production	No production	No production	No production
AGO	Angola	0.356645	0.643355	No production	39.3296	No production	72.1169	No production	No production	28.8443	8.65664	No production	No production	No production	No production	No production	No production	No production	40.0285	12.9822	6.80274	No production	No production	4.42174	15.3706	7.77694	No production	No production	34.0335	No production	No production	No production	9.52128	No production	No production	169.512	No production	No production	No production	No production	No production	No production	No production	No production	No production	No production	No production	No production	303.636
ARG	Argentina	0.71903	0.28097	361.718	171.76	182.896	71.4854	591.157	599.11	227.932	37.8417	11.7126	No production	No production	No production	219.417	No production	511.752	45.4136	33.5503	44.2906	No production	No production	No production	No production	50.8567	2.72096	No production	297.772	10.113	339.648	12.1972	No production	No production	No production	No production	No production	No production	No production	No production	No production	No production	145.682	No production	No production	No production	No production	No production	172.767
ARM	Armenia	0.62069	0.37931	324.613	477.208	528.797	626.121	20.4098	714.15	No production	No production	No production	No production	No production	No production	No production	No production	1163.2	207.206	No production	No production	No production	No production	No production	No production	5.78389	138.097	No production	876.386	1264.81	No production	197.214	No production	No production	587.159	No production	5274.38	No production	169.884	No production	4584	1895.77	1639.39	1981.94	No production	3513.69	No production	No production	442.74
AUS	Australia	0.922856	0.0771441	424.898	294.651	343.29	174.571	1134.32	422.642	578.079	85.1464	No production	No production	No production	153.024	No production	No production	No production	41.4088	6.13468	No production	No production	No production	No production	No production	17.4384	No production	No production	1178.21	819.486	1257.93	487.783	No production	No production	1823.09	No production	1254.28	1164.85	No production	No production	No production	529.521	No production	No production	No production	No production	No production	495.782	583.243
AUT	Austria	0.00831025	0.99169	53.0542	No production	52.2849	31.5922	0.758365	54.9638	302.442	28.6352	No production	No production	No production	7.44566	394.39	93.3404	No production	19.8803	No production	No production	No production	No production	No production	No production	No production	7.64885	No production	152.402	84.3935	116.578	No production	No production	No production	No production	No production	551.757	No production	No production	No production	No production	No production	298.621	No production	No production	No production	No production	No production	192.633
AZE	Azerbaijan	0.733746	0.266254	483.316	976.999	500.51	854.464	1.05077	62.302	2449.59	No production	No production	No production	No production	No production	No production	No production	930.512	286.341	No production	No production	No production	No production	No production	No production	48.1565	140.178	No production	1190.36	1022.27	No production	1567.83	No production	No production	4345.13	No production	No production	No production	1355.46	No production	No production	2611.86	1274	No production	No production	6159.32	No production	4265.29	1664.98
BGD	Bangladesh	0	1	0	17.7806	0	0	No production	No production	0	0	No production	No production	No production	No production	No production	No production	0	131.89	144.339	No production	No production	No production	No production	No production	36.1674	No production	121.67	0	No production	0	0	0	0	368.527	No production	No production	No production	1630.34	2427.85	No production	No production	No production	No production	No production	No production	4026.33	No production	58.0706
BLR	Belarus	0	1	41.595	No production	42.1587	53.5001	0.0157646	47.3682	95.0618	No production	162.376	No production	No production	0.339563	No production	38.9349	97.9587	20.436	No production	No production	No production	No production	No production	No production	No production	5.51719	No production	64.4736	No production	101.741	No production	No production	No production	No production	No production	23.7341	90.6398	50.2531	No production	No production	No production	85.3552	No production	No production	No production	No production	No production	174.003
BEL	Belgium	0	1	77.5922	No production	83.2489	75.6905	66.1703	141.9	No production	38.4677	No production	No production	No production	0	No production	65.9475	No production	13.9744	No production	No production	No production	No production	No production	No production	No production	8.35033	No production	167.277	28.8776	55.6479	No production	No production	No production	No production	No production	No production	No production	No production	No production	No production	No production	No production	No production	No production	No production	No production	No production	No production
BLZ	Belize	0	1	No production	58.4766	No production	35.2977	No production	No production	No production	20.7662	No production	No production	No production	No production	No production	No production	No production	237.18	No production	1.37207	18.4982	No production	No production	No production	22.8184	No production	No production	51.9796	No production	No production	No production	No production	No production	No production	No production	No production	No production	No production	487.857	No production	No production	No production	No production	No production	No production	No production	No production	123.09
BEN	Benin	0.580925	0.419075	96.6804	70.7197	No production	79.2128	No production	No production	4.19766	7.3361	No production	No production	15.2731	No production	No production	No production	2.17618	No production	71.0601	9.83292	No production	40.8587	9.46326	No production	8.52704	No production	No production	62.9369	No production	No production	No production	4.0178	No production	No production	132.676	No production	No production	475.333	1859.12	No production	No production	No production	No production	931.09	No production	No production	459.934	219.262
BTN	Bhutan	0.129771	0.870229	1.57669	43.8168	0.743637	1.00708	No production	No production	0.294045	0	0.651506	No production	No production	No production	No production	No production	0.0456923	6.47238	81.4032	No production	No production	No production	No production	13.2626	10.2096	No production	No production	33.9096	23.694	0	0	No production	No production	No production	No production	No production	No production	736.441	No production	No production	No production	No production	No production	No production	No production	No production	No production	1.4871
BOL	Bolivia	0.466002	0.533998	164.602	325.892	288.483	113.647	No production	30.1317	No production	14.7065	No production	239.721	No production	No production	No production	No production	No production	187.4	No production	48.3875	No production	No production	No production	141.305	20.8103	No production	No production	197.249	225.188	16.433	No production	No production	No production	No production	No production	No production	No production	No production	No production	1241.93	No production	No production	No production	No production	No production	No production	No production	79.5613
BIH	Bosnia and Herzegovina	0	1	14.703	No production	15.9858	23.9717	11.4595	17.8481	No production	No production	No production	No production	No production	No production	No production	No production	No production	8.52223	No production	No production	No production	No production	No production	No production	No production	3.79992	No production	49.5164	No production	22.3605	5.59127	13.7062	No production	No production	No production	60.7288	No production	No production	No production	No production	No production	82.2585	No production	No production	No production	No production	No production	75.0606
BWA	Botswana	1	0	164.519	No production	145.327	1304.64	No production	No production	557.101	517.739	No production	No production	No production	No production	No production	No production	88.3543	7.51435	No production	66.5671	No production	No production	No production	28.3117	5.25091	No production	No production	126.804	No production	No production	No production	No production	No production	No production	No production	No production	No production	340.834	No production	No production	No production	No production	No production	No production	No production	No production	No production	147.211
BRA	Brazil	0.11336	0.88664	56.1274	190.314	18.9873	36.5274	109.543	59.5836	No production	16.3356	119.367	0	No production	No production	No production	No production	No production	40.6245	23.0147	33.0508	No production	No production	19.6039	1.39256	18.3592	No production	No production	143.161	467.833	0.672882	No production	No production	No production	No production	No production	No production	No production	No production	6953.46	116.317	No production	471.996	No production	No production	No production	No production	No production	144.549
BRN	Brunei	0	1	No production	20.7909	No production	No production	No production	No production	No production	No production	No production	No production	No production	No production	No production	No production	No production	No production	No production	0	No production	No production	No production	0	No production	No production	No production	No production	No production	No production	No production	No production	No production	No production	No production	No production	No production	No production	No production	No production	No production	No production	No production	No production	No production	No production	No production	No production
BGR	Bulgaria	0.223235	0.776765	133.278	627.103	146.557	387.485	0.371262	268.005	1107.54	523.575	No production	No production	No production	17.4718	No production	No production	469.107	129.092	No production	No production	No production	No production	No production	No production	No production	65.8374	No production	991.528	No production	500.923	279.705	96.6339	No production	840.775	No production	297.859	No production	No production	No production	246.487	2418.52	2566.33	217.792	No production	212.611	No production	No production	1541.6
BFA	Burkina Faso	0.938042	0.0619579	No production	164.243	No production	26.8022	No production	No production	10.868	16.3513	No production	No production	31.7291	No production	No production	No production	No production	No production	61.6499	12.1293	No production	253.047	50.5003	No production	16.5988	No production	No production	58.2333	No production	No production	No production	21.6967	No production	No production	227.993	No production	No production	414.274	1233.68	No production	1207.77	No production	No production	1517.16	No production	No production	No production	191.034
BDI	Burundi	0.109756	0.890244	73.5456	47.962	No production	62.7297	No production	No production	17.3955	20.0019	No production	No production	No production	No production	No production	No production	41.4939	237.098	69.7968	11.231	No production	28.7602	18.3582	No production	9.21589	No production	No production	38.6063	No production	61.4474	14.163	37.7178	41.2467	No production	No production	No production	No production	430.147	161.739	No production	No production	No production	No production	No production	No production	No production	No production	1211.48
KHM	Cambodia	0	1	No production	45.6462	No production	13.0546	No production	No production	No production	0	No production	No production	No production	No production	No production	No production	No production	391.441	205.212	4.48066	No production	No production	No production	No production	32.6139	No production	No production	0.231445	No production	No production	No production	No production	No production	No production	No production	No production	No production	1652.67	650.574	No production	No production	No production	No production	No production	No production	No production	No production	480.33
CMR	Cameroon	0.121145	0.878855	4.8495	15.694	No production	8.58057	No production	No production	0.0485134	1.97993	No production	No production	No production	No production	No production	No production	0.283281	54.3429	27.916	3.96954	No production	2.80601	1.06937	No production	28.4256	No production	No production	41.3336	No production	No production	No production	0.00847104	No production	No production	70.1167	No production	No production	264.205	374.526	No production	No production	No production	No production	1021.79	No production	No production	No production	134.662
CAN	Canada	0.310441	0.689559	66.2148	No production	58.8809	26.6361	1.02619	45.3983	No production	No production	143.796	No production	No production	5.33452	163.864	99.5236	No production	28.3555	No production	No production	No production	No production	No production	No production	No production	3.69911	No production	104.995	No production	102.363	104.733	No production	No production	271.372	No production	No production	No production	No production	No production	No production	No production	No production	No production	No production	No production	No production	No production	120.483
CAF	Central African Republic	0.0791644	0.920836	No production	3.91911	No production	0.0534183	No production	No production	0.0363126	0.145006	No production	No production	No production	No production	No production	No production	0	No production	41.5016	1.9981	No production	2.86471	0.898083	No production	1.90111	No production	No production	0.0935742	No production	No production	No production	0	No production	No production	No production	No production	No production	17.9114	No production	No production	No production	No production	No production	552.295	No production	No production	No production	No production
TCD	Chad	0.976498	0.0235021	No production	68.6238	No production	167.84	No production	No production	143.657	72.1556	No production	No production	No production	No production	No production	No production	22.136	46.1774	141.423	17.7841	No production	26.7136	25.7769	No production	8.88883	No production	No production	157.131	50.4831	No production	No production	No production	No production	No production	No production	No production	No production	399.681	No production	No production	No production	No production	No production	2562.57	No production	No production	No production	No production
CHL	Chile	0.432792	0.567208	140.061	1128.07	83.6236	422.237	3760.28	87.9613	No production	No production	No production	No production	No production	No production	No production	No production	No production	145.263	No production	No production	No production	No production	No production	64.2053	34.9818	51.6339	No production	2133.84	252.557	2478.14	1616.31	No production	No production	6146.53	No production	No production	1241.77	No production	No production	No production	3073.32	4304.74	No production	No production	No production	No production	No production	No production
CHN	China	0.597832	0.402168	414.18	208.907	372.224	194.262	189.631	492.56	394.45	137.254	374.095	No production	No production	142.94	No production	No production	1.31451	44.4234	40.6111	103.562	No production	83.7261	No production	8.79767	25.5133	60.0594	10.2104	282.024	433.71	580.205	0.10559	0	0.0320483	886.381	No production	233.619	No production	535.612	42.4958	560.217	No production	1617.93	No production	No production	No production	480.841	23.1345	637.743
COL	Colombia	0.0203654	0.979635	173.329	202.181	448.32	184.659	No production	0	No production	166.296	No production	0	No production	No production	No production	No production	No production	29.7381	0.194209	53.224	No production	No production	10.3689	0.985277	16.0574	No production	No production	175.195	0	0	No production	No production	No production	1207.29	No production	No production	No production	No production	No production	No production	No production	No production	No production	No production	No production	No production	No production	187.673
COG	Congo (Republic of the)	0	1	No production	26.5461	No production	3.33154	No production	No production	5.72366	2.36894	No production	No production	No production	No production	No production	No production	No production	No production	12.0554	0.525568	No production	1.11067	0.588892	0.251608	0.746174	No production	No production	3.1261	No production	2.90842	No production	13.4385	No production	No production	No production	No production	No production	No production	No production	No production	No production	No production	No production	210.154	No production	No production	No production	86.2109
COD	Congo (Democratic Republic of the)	0	1	59.0869	31.048	No production	7.19356	No production	No production	1.79556	3.07352	No production	No production	No production	No production	No production	No production	No production	37.6934	31.213	1.30475	No production	12.7703	2.61296	5.68984	2.00322	No production	No production	15.7316	No production	93.8603	No production	2.19843	27.4813	No production	157.237	No production	No production	313.007	No production	No production	No production	No production	No production	No production	No production	No production	No production	185.463
CRI	Costa Rica	0	1	No production	11.8172	No production	0.366095	No production	No production	No production	0	No production	No production	No production	No production	No production	No production	No production	72.1243	No production	8.97093	No production	No production	43.676	66.5699	11.9363	No production	No production	0.00691947	No production	No production	No production	No production	0	No production	No production	No production	No production	180.966	No production	No production	No production	No production	No production	No production	No production	No production	2469.37	45.5025
CIV	Cote d'Ivoire	0.0158061	0.984194	No production	33.8623	No production	16.7863	No production	No production	0.797835	1.47558	No production	No production	0.615799	No production	No production	No production	No production	No production	136.84	10.3811	No production	94.9344	10.4572	No production	7.03131	No production	No production	No production	No production	No production	No production	0.127746	No production	No production	139.385	No production	No production	361.715	578.795	No production	No production	No production	No production	716.638	No production	No production	105.166	183.845
HRV	Croatia	0	1	14.9756	No production	17.9485	23.2091	15.2094	22.8814	44.0719	39.3554	90.7446	No production	No production	1.06947	76.9851	35.4129	No production	11.9094	No production	No production	No production	No production	No production	No production	No production	2.68597	No production	30.9374	No production	210.436	4.63338	40.5655	No production	No production	No production	55.829	No production	No production	No production	No production	31.8093	95.9356	No production	No production	No production	No production	No production	58.9162
CUB	Cuba	0.0114613	0.988539	No production	228.748	No production	141.602	No production	No production	No production	No production	No production	No production	No production	No production	No production	No production	No production	60.0384	158.619	111.995	91.1125	No production	42.4528	No production	58.7631	No production	No production	137.894	No production	No production	No production	No production	No production	No production	No production	No production	No production	No production	No production	No production	No production	No production	No production	No production	No production	No production	No production	No production
CYP	Cyprus	1	0	No production	No production	No production	No production	No production	No production	No production	No production	No production	No production	No production	No production	No production	No production	No production	No production	No production	No production	No production	No production	No production	No production	No production	No production	No production	No production	No production	No production	No production	No production	No production	No production	No production	No production	No production	No production	No production	No production	No production	No production	No production	No production	No production	No production	No production	No production
CZE	Czech Republic	0.0417827	0.958217	37.7916	No production	41.4768	32.5634	6.7609	51.2631	225.198	No production	18.9484	No production	No production	4.78372	No production	65.6492	64.9059	10.3982	No production	No production	No production	No production	No production	No production	No production	4.92936	No production	8.4573	94.9115	76.1364	No production	No production	No production	No production	No production	No production	20.4292	140.573	No production	No production	No production	249.342	No production	No production	No production	No production	No production	237.673
DNK	Denmark	0	1	129.678	No production	164.538	No production	31.0704	171.278	No production	No production	No production	No production	No production	0	No production	86.5764	No production	17.3748	No production	No production	No production	No production	No production	No production	No production	12.4306	No production	No production	86.8077	126.27	No production	No production	No production	No production	No production	No production	No production	131.54	No production	No production	No production	No production	No production	No production	No production	No production	No production	No production
DJI	Djibouti	0	1	No production	No production	No production	No production	No production	No production	No production	No production	No production	No production	No production	No production	No production	No production	No production	No production	No production	No production	No production	No production	No production	No production	No production	No production	No production	No production	No production	No production	No production	No production	No production	No production	No production	No production	No production	No production	No production	No production	No production	No production	No production	No production	No production	No production	No production	No production
DOM	Dominican Republic	0.0810811	0.918919	No production	257.519	No production	453.826	No production	No production	No production	236.847	No production	No production	No production	No production	No production	No production	No production	75.8925	99.3616	155.543	135.154	No production	62.4006	135.676	68.5547	No production	No production	458.144	205.805	No production	No production	373.127	457.135	No production	No production	No production	No production	No production	8055.74	No production	No production	No production	No production	No production	No production	No production	No production	No production
ECU	Ecuador	0.161549	0.838451	575.792	251.645	512.746	185.362	No production	51.0771	No production	43.8853	No production	298.685	No production	No production	No production	No production	No production	98.0794	No production	197.025	No production	No production	0	130.348	35.1981	No production	No production	554.074	181.222	226.552	No production	No production	No production	655.99	No production	No production	533.227	No production	No production	No production	No production	No production	No production	No production	No production	No production	No production	459.327
EGY	Egypt	1	0	1054.24	1092.94	1990.86	1129.44	3385.62	No production	No production	1298.55	No production	No production	No production	No production	No production	No production	No production	313.128	313.642	No production	No production	411.35	No production	No production	144.811	167.952	No production	2225.37	1916.65	No production	2743.39	2174.52	No production	5288.14	No production	No production	3536.88	2616.76	No production	No production	No production	5453.27	No production	No production	No production	No production	5638.19	2863.01
SLV	El Salvador	0	1	No production	5.88429	No production	1.80263	No production	No production	No production	0.206036	No production	No production	No production	No production	No production	No production	No production	38.6099	No production	4.59459	9.31801	No production	No production	No production	16.8711	No production	No production	0.0823734	No production	No production	No production	No production	No production	No production	No production	No production	No production	No production	1509.37	No production	No production	No production	No production	No production	No production	No production	No production	297.844
GNQ	Equatorial Guinea	0	1	No production	No production	No production	39.1783	No production	No production	No production	No production	No production	No production	No production	No production	No production	No production	No production	No production	11.1337	17.5544	No production	15.7664	0	0	2.18913	No production	No production	No production	No production	No production	No production	No production	No production	No production	No production	No production	No production	No production	No production	No production	No production	No production	No production	No production	No production	No production	No production	0
ERI	Eritrea	1	0	513.119	No production	643.898	617.363	No production	No production	716.139	479.554	No production	No production	No production	No production	No production	No production	361.091	91.1793	22.8572	No production	No production	No production	50.0644	182.081	6.14762	No production	No production	552.227	560.882	248.904	209.003	No production	No production	1226.32	No production	465.3	No production	669.223	No production	No production	No production	No production	No production	No production	No production	No production	587.159	No production
EST	Estonia	0	1	10.0948	No production	10.0533	8.04841	0.1352	10.772	No production	No production	6.15645	No production	No production	3.91538	No production	24.9946	5.62672	4.60225	No production	No production	No production	No production	No production	No production	No production	0.113313	No production	7.92991	No production	32.5943	No production	No production	No production	No production	No production	No production	No production	No production	No production	No production	No production	No production	No production	No production	No production	No production	No production	33.8588
ETH	Ethiopia	0.651756	0.348244	70.4583	No production	118.868	37.1932	No production	51.9049	55.8438	67.4857	No production	No production	No production	No production	No production	No production	100.372	53.2972	43.8956	37.7244	No production	No production	45.8862	24.3082	7.20806	No production	No production	82.305	52.3164	48.7039	22.5044	465.522	401.003	191.01	No production	45.913	No production	482.599	No production	No production	No production	No production	No production	No production	No production	No production	830.795	35.3496
FIN	Finland	0	1	87.5601	No production	86.7647	31.1423	110.922	79.9223	No production	No production	No production	No production	No production	No production	No production	87.7498	No production	16.1569	No production	No production	No production	No production	No production	No production	No production	4.73203	No production	No production	No production	156.112	No production	No production	No production	No production	No production	No production	No production	No production	No production	No production	No production	No production	No production	No production	No production	No production	No production	156.82
FRA	France	0.0133967	0.986603	111.21	463.039	112.995	127.241	113.443	139.879	No production	75.5051	231.699	No production	No production	2.97117	No production	175.132	No production	14.455	No production	No production	No production	No production	No production	No production	No production	9.18093	No production	No production	123.26	107.258	432.741	No production	No production	No production	No production	776.323	No production	0	No production	No production	1109.61	651.499	No production	No production	448.519	No production	No production	473.726
GUF	French Guiana	0	1	No production	239.638	No production	No production	No production	No production	No production	No production	No production	No production	No production	No production	No production	No production	No production	No production	No production	91.068	No production	179.529	No production	No production	3.76367	No production	No production	No production	No production	No production	No production	No production	No production	No production	No production	No production	No production	No production	No production	No production	No production	No production	No production	No production	No production	No production	No production	No production
GAB	Gabon	0	1	No production	55.1734	No production	13.0055	No production	No production	No production	33.6237	No production	No production	No production	No production	No production	No production	No production	No production	46.4926	3.95338	No production	3.50471	0.268505	0	1.94487	No production	No production	0	No production	4.42333	No production	No production	No production	No production	No production	No production	No production	0	No production	No production	No production	No production	No production	342.957	No production	No production	No production	122.713
GEO	Georgia	0.0661765	0.933824	163.894	46.0581	197.416	506.873	1.35181	272.275	No production	No production	89.7094	No production	No production	No production	No production	No production	230.065	91.2485	No production	No production	No production	No production	No production	No production	No production	32.3134	No production	709.036	No production	42.4101	No production	No production	No production	No production	No production	1108.18	No production	No production	No production	1885.97	1014.51	840.856	1571.86	No production	918.841	No production	No production	915.429
DEU	Germany	0	1	70.7613	No production	79.7242	37.3978	23.3556	100.716	No production	84.6523	28.2093	No production	No production	0.0028128	No production	58.5702	No production	12.4233	No production	No production	No production	No production	No production	No production	No production	9.31007	No production	99.5774	43.9491	73.6168	No production	No production	No production	No production	No production	No production	26.7763	26.9932	No production	No production	No production	20.5743	No production	No production	No production	No production	No production	12.6314
GHA	Ghana	0.173729	0.826271	No production	45.8663	No production	30.9315	No production	No production	1.80996	1.1241	No production	No production	7.12625	No production	No production	No production	0	No production	175.393	4.4189	No production	18.7781	4.06736	No production	11.0654	No production	No production	0	No production	No production	No production	0	No production	No production	50.1012	No production	No production	3424.47	380.029	No production	No production	No production	No production	1402.81	No production	No production	2377.59	No production
GRC	Greece	0.548708	0.451292	327.719	588.19	249.149	317.314	397.71	298.566	No production	No production	No production	No production	No production	3.24998	No production	No production	586.311	130.998	No production	No production	No production	No production	No production	No production	No production	54.0421	No production	1221.87	939.084	593.276	443.303	368.924	No production	No production	No production	1501.95	No production	1110.88	No production	2284.45	2644.77	2786.02	2139.76	No production	2165.57	No production	397.077	1423.69
GTM	Guatemala	0.0244648	0.975535	12.0543	40.0267	8.63104	11.5933	No production	No production	No production	0.791691	No production	No production	No production	No production	No production	No production	No production	60.6088	No production	47.9964	3.37621	No production	No production	No production	13.4192	No production	No production	0.750488	2.85541	No production	No production	No production	No production	No production	No production	No production	No production	151.473	592.148	No production	No production	No production	No production	No production	No production	No production	355.174	274.747
GIN	Guinea	0.0137552	0.986245	No production	18.2867	No production	0.00895589	No production	No production	0	0	No production	No production	0.000783734	No production	No production	No production	0	No production	63.0627	16.3319	No production	3.96137	12.5627	28.7813	0.481257	No production	No production	No production	No production	No production	No production	0	No production	No production	No production	No production	No production	1121.78	713.303	No production	No production	No production	No production	144.322	No production	No production	No production	263.906
GNB	Guinea-Bissau	0	1	No production	215.797	No production	0	No production	No production	0	0	No production	No production	0	No production	No production	No production	0	No production	28.8128	18.0577	No production	No production	No production	101.852	No production	No production	No production	No production	No production	No production	No production	0	No production	No production	No production	No production	No production	1547.24	3047.74	No production	No production	No production	No production	No production	No production	No production	No production	No production
GUY	Guyana	0	1	No production	315.457	No production	442.784	No production	No production	No production	No production	No production	No production	No production	No production	No production	No production	No production	No production	537.824	55.2859	No production	503.824	No production	7.77932	26.9526	No production	No production	No production	3753.58	706.508	No production	No production	No production	No production	No production	No production	No production	No production	No production	No production	No production	No production	No production	No production	No production	No production	No production	No production
HTI	Haiti	0.0777778	0.922222	No production	317.201	No production	394.679	No production	No production	No production	342.52	No production	No production	No production	No production	No production	No production	No production	43.5111	185.15	132.195	43.0818	No production	39.2735	111.655	28.4068	No production	No production	215.812	35.6351	No production	No production	278.682	566.043	No production	No production	No production	No production	No production	3049.51	No production	No production	No production	No production	No production	No production	No production	No production	No production
HND	Honduras	0.0322581	0.967742	135.829	70.8849	No production	81.3019	No production	No production	No production	42.0644	No production	No production	No production	No production	No production	No production	No production	79.7971	No production	63.2203	5.63045	No production	No production	No production	13.5629	No production	No production	58.8928	0	No production	No production	No production	No production	No production	No production	No production	No production	No production	1314.92	No production	No production	No production	No production	No production	No production	No production	No production	378.584
HUN	Hungary	0.168798	0.831202	79.7598	336.958	86.5421	112.536	0.517551	130.347	365.96	245.469	No production	No production	No production	18.0805	559.618	60.7389	No production	28.2353	No production	No production	No production	No production	No production	No production	No production	15.1794	No production	238.009	47.7728	185.247	72.2454	81.8568	No production	No production	No production	119.878	No production	No production	No production	No production	No production	784.871	No production	No production	No production	No production	No production	416.523
IND	India	0.521033	0.478967	593.009	446.619	529.239	237.302	2.46973	0	420.809	335.764	0	No production	No production	No production	No production	No production	0	79.5999	159.55	47.9712	No production	No production	No production	197.213	87.6672	No production	106.171	1047.77	3.87111	87.2731	301.069	0	143.95	1266.8	No production	No production	No production	2540.33	5542.64	No production	No production	No production	No production	No production	No production	2582.62	No production	1394.77
IDN	Indonesia	0.00287977	0.99712	No production	39.082	No production	9.65834	No production	No production	No production	No production	No production	No production	No production	No production	No production	No production	No production	78.9804	54.8437	6.39668	No production	0	0	44.0737	9.73199	No production	386.666	36.9957	No production	No production	No production	No production	No production	No production	No production	No production	No production	0	1062.62	No production	No production	No production	No production	No production	No production	2359.12	948.916	1010.58
IRN	Iran	0.987179	0.0128205	624.381	1043.08	649.368	688.933	No production	No production	3841.63	1849.17	No production	No production	No production	No production	No production	No production	No production	172.452	No production	No production	No production	No production	No production	69.0038	91.1526	198.896	No production	1917.66	803.124	1722.95	2953.83	No production	No production	9405.52	No production	1173.99	No production	2632.01	No production	1212.02	5546	2560.5	11011.7	No production	5673.26	No production	3610.05	2745.05
IRQ	Iraq	0.999343	0.000657462	1741.31	5946.08	2511.11	3939.57	No production	No production	2908.23	No production	No production	No production	No production	No production	No production	No production	No production	392.61	No production	No production	No production	No production	No production	No production	60.2383	87.1661	No production	1712.13	1074.26	No production	4194.69	No production	No production	9688.68	No production	4918.59	No production	2318.71	No production	No production	3879.72	2233.82	2075.11	No production	6652.7	No production	No production	2430.96
IRL	Ireland	0	1	0.847525	No production	1.48089	No production	No production	1.63355	No production	No production	No production	No production	No production	No production	No production	No production	No production	1.02623	No production	No production	No production	No production	No production	No production	No production	0.502728	No production	4.9635	7.10395	11.0819	No production	No production	No production	No production	No production	No production	No production	16.301	No production	No production	No production	No production	No production	No production	No production	No production	No production	No production
ISR	Israel	0.958333	0.0416667	639.66	No production	904.794	317.332	No production	2710.36	No production	273.612	No production	No production	No production	No production	No production	No production	No production	116.059	No production	No production	No production	No production	No production	No production	No production	No production	No production	No production	No production	No production	923.995	No production	No production	9873.56	No production	7792.84	No production	No production	No production	No production	4460.66	No production	No production	No production	No production	No production	No production	No production
ITA	Italy	0.218304	0.781696	188.891	411.759	155.963	156.537	174.899	255.819	No production	150.277	533.517	No production	No production	0	No production	77.6408	269.487	68.8734	No production	No production	No production	No production	No production	No production	No production	36.6139	No production	604.79	699.261	333.258	214.624	No production	No production	No production	No production	1065.27	No production	No production	No production	954.398	1550.56	No production	No production	No production	1585.76	No production	No production	499.588
JAM	Jamaica	0.027027	0.972973	No production	No production	No production	252.964	No production	No production	No production	No production	No production	No production	No production	No production	No production	No production	No production	44.7019	29.363	34.2818	No production	No production	19.0807	15.2148	25.8923	No production	No production	157.922	106.898	292.992	No production	241.944	222.45	No production	No production	No production	No production	No production	No production	No production	No production	No production	No production	No production	No production	No production	No production	No production
JPN	Japan	0	1	24.5909	51.7568	31.5303	No production	No production	No production	No production	No production	111.958	No production	No production	No production	No production	No production	No production	4.80004	8.70728	No production	No production	14.7703	4.83805	6.63618	5.25128	2.11154	No production	71.6745	No production	No production	No production	No production	No production	No production	No production	No production	No production	No production	No production	272.003	No production	No production	No production	No production	No production	No production	No production	151.063
JOR	Jordan	0.990196	0.00980392	888.424	No production	1027.35	210.274	No production	No production	No production	340.437	No production	No production	No production	No production	No production	No production	No production	113.24	No production	No production	No production	No production	No production	No production	No production	38.0363	No production	No production	717.292	No production	890.987	No production	No production	3706.58	No production	2244.63	No production	No production	No production	No production	972.393	No production	1437.33	No production	No production	No production	1098.88	1328.68
KAZ	Kazakhstan	0.988033	0.011967	189.543	2383.05	460.918	858.783	1.42055	491.164	628.424	41.3741	1391.63	No production	No production	No production	No production	No production	969.292	173.313	No production	16.5645	No production	No production	No production	No production	No production	94.2388	No production	88.1516	70.0749	324.214	57.3631	No production	No production	No production	No production	257.325	No production	110.466	No production	No production	No production	178.253	No production	No production	No production	No production	No production	735.022
KEN	Kenya	0.850117	0.149883	118.428	105.42	49.6268	141.815	No production	75.9927	243.49	229.675	No production	No production	No production	No production	No production	No production	88.2026	34.6274	25.3517	36.4773	No production	No production	14.8451	7.80131	7.63716	No production	No production	420.984	No production	25.2666	198.962	419.319	334.804	108.336	No production	224.007	No production	603.532	159.059	No production	No production	No production	No production	No production	No production	No production	465.241	29.5394
KWT	Kuwait	1	0	1181.51	No production	1183.27	332.878	No production	No production	No production	No production	No production	No production	No production	No production	No production	No production	No production	131.143	No production	No production	No production	No production	No production	No production	No production	No production	No production	No production	No production	No production	No production	No production	No production	No production	No production	No production	No production	No production	No production	No production	No production	No production	No production	No production	No production	No production	No production	No production
KGZ	Kyrgyzstan	0.796675	0.203325	253.057	1526.16	285.735	437.701	No production	549.637	No production	1837.24	7024.92	No production	No production	No production	No production	No production	No production	158.821	No production	No production	No production	No production	No production	No production	No production	110.938	No production	No production	No production	6896.16	No production	No production	No production	No production	No production	No production	No production	964.368	No production	No production	9469.45	No production	No production	No production	13690.5	No production	No production	No production
LAO	Laos	0	1	0	46.6353	No production	0.0544028	No production	No production	0	0	No production	No production	No production	No production	0	No production	0	251.179	132.12	0.385628	No production	No production	No production	No production	29.2139	No production	50.6847	1.20844	No production	0	0	0	0	No production	No production	No production	No production	1199.42	298.056	No production	No production	No production	No production	No production	No production	483.301	No production	840.661
LVA	Latvia	0	1	5.97619	No production	8.36335	16.3021	0.241209	9.12437	No production	No production	30.2592	No production	No production	1.15062	No production	8.53973	27.1825	3.0202	No production	No production	No production	No production	No production	No production	No production	0.458997	No production	16.2652	No production	21.3118	No production	No production	No production	No production	No production	30.0488	57.4404	28.3214	No production	No production	No production	No production	No production	No production	No production	No production	No production	No production
LBN	Lebanon	0.916667	0.0833333	299.41	No production	401.806	849.901	No production	464.947	No production	1375.18	No production	No production	No production	No production	No production	No production	No production	136.086	No production	No production	No production	No production	No production	No production	No production	109.772	No production	2032	1201.15	852.733	886.879	No production	No production	3017.3	No production	2034.65	1107.71	343.642	No production	No production	1050.8	1369.28	607.939	No production	No production	No production	429.961	766.64
LSO	Lesotho	0.567308	0.432692	168.323	No production	231.135	124.848	654.79	21.5319	89.958	84.6084	No production	No production	No production	No production	No production	No production	113.492	3.83437	27.8136	No production	No production	No production	No production	No production	No production	No production	No production	142.789	No production	171.289	No production	93.0245	No production	No production	No production	No production	111.564	No production	No production	No production	No production	No production	No production	No production	No production	No production	No production	31.6037
LBR	Liberia	0	1	No production	0.25443	No production	6.21985	No production	No production	No production	No production	No production	No production	No production	No production	No production	No production	No production	No production	8.13454	0.0162601	No production	0.8916	0.710964	No production	11.3274	No production	No production	No production	No production	No production	No production	No production	No production	No production	No production	No production	No production	211.702	35.3187	No production	No production	No production	No production	93.6212	No production	No production	104.718	270.812
LBY	Libya	1	0	2140.08	No production	4264.05	1587.97	No production	No production	2463.4	No production	No production	No production	No production	No production	No production	No production	No production	150.5	No production	No production	No production	No production	No production	No production	No production	No production	No production	973.812	1900.2	1421.71	1510.47	No production	No production	No production	No production	No production	No production	No production	No production	No production	9614.66	No production	No production	No production	No production	No production	No production	No production
LTU	Lithuania	0	1	6.63849	No production	8.34299	23.1572	0.0950376	10.3932	No production	No production	51.6464	No production	No production	1.54235	No production	20.9184	39.2897	4.12619	No production	No production	No production	No production	No production	No production	No production	0.797931	No production	13.7618	No production	29.0751	No production	No production	No production	No production	No production	26.3415	47.5152	26.4065	No production	No production	No production	No production	No production	No production	No production	No production	No production	No production
LUX	Luxembourg	0	1	36.378	No production	31.977	7.24926	2.12544	29.1634	No production	No production	No production	No production	No production	0	No production	4.09989	No production	5.50162	No production	No production	No production	No production	No production	No production	No production	13.3966	No production	19.0821	No production	13.2534	No production	No production	No production	No production	No production	No production	No production	No production	No production	No production	No production	No production	No production	No production	No production	No production	No production	No production
MKD	Macedonia	0.40404	0.59596	199.955	413.034	215.05	349.247	1.34289	375.624	No production	No production	No production	No production	No production	No production	No production	No production	56.5511	115.869	No production	No production	No production	No production	No production	No production	No production	36.2773	No production	360.044	No production	369.751	No production	205.668	No production	No production	No production	848.051	No production	No production	No production	955.458	1061.33	1338.86	425.413	No production	No production	No production	No production	400.802
MDG	Madagascar	0.152884	0.847116	2.07271	159.144	No production	230.222	No production	No production	No production	No production	No production	No production	No production	No production	No production	No production	No production	339.079	127.351	64.9799	No production	48.0481	No production	No production	41.9645	No production	No production	104.289	No production	633.101	No production	0.69246	No production	No production	No production	No production	No production	379.722	1844.04	No production	No production	No production	No production	No production	No production	No production	No production	No production
MWI	Malawi	0.430986	0.569014	1.56034	60.3981	No production	17.4717	No production	No production	6.11875	9.82669	No production	No production	No production	No production	No production	No production	No production	53.2913	22.4627	12.0051	No production	No production	No production	No production	7.03619	No production	No production	34.329	No production	20.906	0	9.58418	16.7206	21.4133	No production	No production	No production	92.5446	69.2306	No production	No production	No production	No production	No production	No production	No production	483.484	58.7784
MYS	Malaysia	0	1	No production	38.2465	No production	19.1477	No production	No production	No production	0	No production	No production	No production	No production	32.8293	No production	No production	No production	12.1712	7.86568	No production	No production	No production	5.82025	3.74741	No production	0	0	No production	No production	No production	No production	No production	No production	No production	No production	No production	636.622	35.1416	No production	No production	No production	No production	No production	No production	0	0	No production
MLI	Mali	0.968994	0.0310057	619.596	647.39	No production	51.8087	No production	No production	174.401	111.166	No production	No production	91.1361	No production	No production	No production	No production	No production	48.6389	38.7748	No production	31.1108	29.9969	No production	21.5838	No production	No production	No production	No production	198.521	No production	326.765	No production	No production	1284.08	No production	No production	801.744	669.197	No production	No production	No production	No production	604.667	No production	No production	No production	No production
MRT	Mauritania	1	0	No production	912.819	No production	1282.3	No production	No production	2982.5	1446.96	No production	No production	No production	No production	No production	No production	No production	No production	1099.99	No production	No production	No production	No production	No production	144.682	No production	No production	No production	No production	2118.18	No production	517.182	No production	No production	238.058	No production	No production	3967.01	31951.4	No production	No production	No production	No production	No production	No production	No production	No production	No production
MEX	Mexico	0.72603	0.27397	541.392	150.832	180.529	129.427	No production	419.554	No production	281.207	No production	No production	No production	161.238	2711.12	No production	No production	94.6021	No production	24.1344	No production	No production	No production	No production	37.3399	No production	No production	842.678	0	No production	424.66	No production	No production	685.961	No production	No production	No production	No production	No production	No production	No production	957.676	1227.94	No production	No production	No production	2412.91	626.496
MDA	Moldova	0.918919	0.0810811	181.266	No production	219.237	360.023	1.46956	303.314	334.027	No production	1376.07	No production	No production	No production	No production	No production	223.113	162.17	No production	No production	No production	No production	No production	No production	No production	48.2057	No production	698.763	No production	594.08	No production	No production	No production	No production	No production	286.018	No production	No production	No production	No production	No production	587.37	No production	No production	No production	No production	No production	1250.48
MNG	Mongolia	0.951785	0.0482146	336.057	No production	119.707	3.81108	No production	156.694	No production	No production	60.0578	No production	No production	No production	No production	No production	No production	22.3103	No production	No production	No production	No production	No production	No production	No production	No production	No production	No production	No production	39.1979	No production	No production	No production	No production	No production	57.8371	No production	143.437	No production	No production	No production	No production	No production	No production	No production	No production	No production	113.786
MAR	Morocco	0.9906	0.00939986	671.667	463.191	1137.87	3611.51	No production	927.632	1265.85	1619.99	No production	No production	No production	No production	No production	No production	No production	103.26	No production	No production	No production	No production	No production	No production	39.2874	58.3029	No production	3512.21	2406.87	2552.31	1208.1	No production	No production	4274.89	No production	3482.28	2357.2	2247.52	No production	No production	5516.6	2427.77	No production	No production	No production	No production	No production	No production
MOZ	Mozambique	0.510771	0.489229	64.2261	598.294	No production	196.143	No production	No production	66.1163	53.8442	No production	No production	No production	No production	No production	No production	No production	45.9338	29.4267	58.4917	No production	No production	No production	13.6499	91.2619	No production	No production	24.5797	No production	2.80677	0	1.18891	2.08904	No production	No production	No production	No production	1002.14	987.582	No production	No production	No production	No production	No production	No production	No production	600.803	122.193
MMR	Myanmar (Burma)	0.0185538	0.981446	47.011	11.6552	0.377671	7.9438	554.978	0	25.5644	0	0.825152	No production	No production	0	No production	No production	119.431	173.223	84.2587	18.7896	No production	No production	No production	No production	32.3447	No production	196.294	5.64333	0.425677	43.6466	16.3234	20.8077	31.2642	1.49805	No production	No production	No production	1597.83	No production	No production	No production	1039.86	No production	No production	No production	1831.95	No production	897.825
NAM	Namibia	1	0	No production	No production	No production	81.563	No production	No production	105.606	124.381	No production	No production	No production	No production	No production	No production	No production	No production	28.787	134.595	No production	No production	No production	14.4917	No production	No production	No production	2775.73	No production	No production	No production	No production	No production	No production	No production	No production	No production	84.7323	No production	No production	No production	No production	No production	No production	No production	No production	No production	No production
NPL	Nepal	0.215606	0.784394	47.8069	146.247	61.1868	9.7686	No production	No production	5.80159	No production	21.7869	No production	No production	No production	No production	No production	No production	33.0605	53.8894	No production	No production	No production	No production	279.613	61.0986	No production	No production	2.66856	14.9597	0	0	No production	1.11056	694.941	No production	No production	No production	1237.39	No production	No production	No production	No production	No production	No production	No production	No production	No production	5.9744
NLD	Netherlands	0	1	146.593	No production	183.77	160.555	55.5693	244.216	No production	No production	No production	No production	No production	0	No production	99.8397	No production	20.2614	No production	No production	No production	No production	No production	No production	No production	17.0454	No production	149.993	38.383	140.169	No production	No production	No production	No production	No production	No production	No production	No production	No production	No production	No production	No production	No production	No production	No production	No production	No production	No production
NZL	New Zealand	0.0625	0.9375	76.2945	No production	81.7994	72.906	No production	101.849	No production	No production	No production	No production	No production	No production	No production	No production	159.441	14.3633	44.9836	No production	No production	No production	No production	No production	No production	No production	No production	No production	No production	158.894	No production	No production	No production	200.475	No production	No production	No production	No production	No production	No production	No production	No production	No production	No production	No production	No production	No production	No production
NIC	Nicaragua	0.0465116	0.953488	125.57	45.0482	No production	28.9036	No production	No production	No production	15.0016	No production	No production	No production	No production	No production	No production	No production	48.4066	No production	13.9295	No production	No production	No production	No production	9.46867	No production	No production	14.3968	No production	No production	No production	No production	No production	No production	No production	No production	No production	No production	No production	No production	No production	No production	No production	No production	No production	No production	No production	219.353
NER	Niger	1	0	26.4903	396.13	No production	284.005	No production	No production	114.9	322.198	No production	No production	209.758	No production	No production	No production	No production	157.507	93.5146	61.8357	No production	63.9256	109.25	No production	9.64158	No production	No production	88.7301	No production	No production	No production	204.907	No production	No production	No production	No production	No production	501.404	2324.01	No production	No production	No production	No production	1868.93	No production	No production	No production	421.858
NGA	Nigeria	0.563704	0.436296	103.606	162.906	No production	57.0535	No production	No production	49.0111	62.9712	No production	No production	952.922	No production	No production	No production	No production	151.882	113.595	3.36879	No production	6.03595	4.46875	No production	58.8834	No production	No production	133.504	No production	No production	No production	2.82099	No production	No production	155.699	No production	No production	1837.88	1539.5	No production	No production	No production	No production	1222.34	No production	No production	No production	463.024
PRK	Korea, Democratic People's Republic of	0	1	500.592	147.559	531.27	44.604	116.952	589.105	9.93484	9.1947	46.292	No production	No production	No production	No production	No production	25.9476	24.2395	26.5042	63.5047	No production	No production	No production	No production	No production	No production	No production	12.591	101.199	108.05	No production	No production	No production	No production	No production	No production	No production	218.318	No production	925.896	No production	1421.9	No production	No production	No production	No production	1017.18	290.349
NOR	Norway	0	1	70.9679	No production	82.3965	No production	8.3519	72.736	No production	No production	No production	No production	No production	0.316285	No production	No production	No production	17.8021	No production	No production	No production	No production	No production	No production	No production	No production	No production	No production	No production	No production	No production	No production	No production	No production	No production	No production	No production	No production	No production	No production	No production	No production	No production	No production	No production	No production	No production	No production
OMN	Oman	1	0	1306.03	No production	No production	No production	No production	No production	No production	1115.05	No production	No production	No production	No production	No production	No production	2078.14	92.3818	No production	No production	No production	No production	No production	No production	No production	No production	No production	No production	No production	No production	No production	No production	No production	No production	No production	No production	No production	No production	No production	No production	No production	No production	No production	No production	No production	No production	No production	No production
PAK	Pakistan	0.914836	0.0851639	1786.87	1860.36	2936.62	1274.36	No production	No production	4575	4834.19	No production	No production	No production	No production	No production	No production	No production	200.562	No production	No production	No production	No production	No production	168.485	217.086	No production	No production	4763.6	No production	3625.94	2859.73	No production	840.102	5829.75	No production	No production	No production	1318.61	No production	No production	No production	No production	No production	No production	No production	No production	No production	No production
PAN	Panama	0	1	No production	35.6496	No production	5.51252	No production	No production	No production	0.204937	No production	No production	No production	No production	No production	No production	No production	39.0699	No production	3.78247	9.53594	No production	29.4927	No production	14.3344	No production	No production	2.31776	No production	No production	No production	No production	21.4613	No production	No production	No production	No production	923.663	No production	No production	No production	No production	No production	No production	No production	No production	No production	No production
PNG	Papua New Guinea	0	1	No production	No production	No production	No production	No production	No production	No production	No production	No production	No production	No production	No production	No production	No production	No production	No production	4.26104	1.1544	No production	0.560765	1.7153	1.979	1.2746	No production	No production	No production	No production	No production	No production	No production	No production	No production	No production	No production	No production	131.712	No production	No production	No production	No production	No production	No production	No production	No production	131.191	No production
PRY	Paraguay	0.486977	0.513023	125.566	51.0394	236.303	95.1685	No production	136.737	No production	33.3271	17.1081	227.628	No production	No production	No production	No production	No production	146.363	0.86712	17.7316	No production	No production	0.844854	50.6097	34.7132	No production	No production	327.03	44.3169	24.8789	No production	No production	No production	No production	No production	No production	No production	No production	No production	486.497	No production	No production	No production	No production	No production	No production	No production	37.4399
PER	Peru	0.303394	0.696606	705.918	314.001	240.275	342.722	No production	948.658	No production	No production	No production	719.414	No production	No production	No production	No production	817.216	180.119	98.6587	113.72	545.874	No production	No production	169.545	34.2125	No production	No production	367.133	400.482	480.471	905.077	No production	No production	2826.98	No production	No production	990.317	No production	No production	318.095	No production	No production	No production	No production	No production	No production	No production	No production
PHL	Philippines	0	1	No production	31.6733	No production	16.3054	No production	No production	No production	No production	No production	No production	No production	No production	No production	No production	No production	36.5404	72.1071	7.8087	No production	12.5113	53.7382	104.474	9.18416	No production	No production	19.9784	No production	No production	No production	No production	No production	No production	No production	No production	No production	793.919	1645.4	No production	No production	No production	No production	No production	No production	No production	771.55	45.5468
POL	Poland	0	1	40.557	No production	46.4462	21.1001	10.1051	54.5993	33.6199	No production	85.7479	No production	No production	1.17158	No production	44.9319	11.9243	8.85385	No production	No production	No production	No production	No production	No production	No production	3.72895	No production	32.353	12.7739	43.9097	No production	No production	No production	No production	No production	19.0757	71.0362	56.8288	No production	No production	No production	67.903	No production	No production	No production	No production	No production	86.3649
PRT	Portugal	0.43804	0.56196	315.882	605.644	394.989	474.449	2369.53	424.345	No production	No production	No production	No production	No production	1.54028	No production	3340.94	No production	130.285	319.248	No production	No production	No production	No production	No production	No production	54.1261	No production	3908.92	2394.12	1833.06	939.203	No production	No production	9396.52	No production	3597.14	5126.86	3925.5	No production	3236.21	5753.52	2138.94	No production	No production	9209.55	No production	4039.27	2252
PRI	Puerto Rico	0	1	No production	No production	No production	143.917	No production	No production	No production	No production	No production	No production	No production	No production	No production	No production	No production	No production	68.8324	172.531	No production	No production	28.5946	152.732	73.3696	No production	No production	No production	No production	No production	No production	No production	179.572	No production	No production	No production	No production	No production	No production	No production	No production	No production	No production	No production	No production	No production	No production	No production
ROU	Romania	0.193939	0.806061	223.212	1592.08	228.825	424.498	0.756949	337.899	617.424	521.662	1362.21	No production	No production	12.9822	529.196	No production	477.774	48.0909	No production	No production	No production	No production	No production	No production	No production	38.4755	No production	555.329	No production	604.61	293.758	74.5146	No production	1015.04	No production	159.316	No production	No production	No production	No production	No production	1844.27	No production	No production	No production	No production	No production	1358.34
RUS	Russia	0.128766	0.871234	127.466	478.944	121.363	217.14	0.0923171	137.032	530.409	33.8437	523.629	No production	No production	1.38978	No production	37.0847	323.566	56.9891	23.4864	40.566	No production	No production	No production	No production	No production	21.0401	No production	43.5481	No production	299.814	67.9915	No production	No production	No production	No production	273.656	No production	39.6228	No production	153.582	No production	472.57	No production	No production	155.188	No production	No production	762.055
RWA	Rwanda	0	1	41.7566	92.3462	No production	68.6214	No production	No production	25.7903	36.9758	No production	No production	No production	No production	No production	No production	62.1702	24.9639	43.2295	23.5106	No production	29.7372	8.82498	No production	12.0604	No production	No production	56.149	No production	69.4862	43.2205	75.334	34.2368	No production	No production	No production	No production	349.203	161.849	No production	No production	No production	No production	No production	No production	No production	No production	682.574
SAU	Saudi Arabia	0.99968	0.000319591	983.898	No production	868.484	1221.38	No production	No production	3155.51	2081.87	No production	No production	No production	No production	No production	No production	No production	232.343	No production	No production	No production	No production	No production	No production	No production	No production	No production	158.651	183.015	No production	1963.83	No production	No production	8074.05	No production	No production	No production	1570.51	No production	No production	No production	No production	No production	No production	No production	No production	No production	No production
SEN	Senegal	0.837012	0.162988	No production	493.027	No production	30.6019	No production	No production	65.2488	81.1537	No production	No production	0.423556	No production	No production	No production	14.5008	No production	31.8641	207.529	No production	No production	No production	69.3858	29.4775	No production	No production	No production	No production	6405.69	No production	359.027	No production	No production	No production	No production	No production	5998.47	3253.24	No production	No production	No production	No production	No production	No production	No production	469.694	No production
SCG	Serbia and Montenegro	0.0409639	0.959036	57.8232	20.9236	70.5019	138.02	0.977407	99.6849	210.472	162.318	No production	No production	No production	10.1951	335.224	No production	50.52	63.9359	No production	No production	No production	No production	No production	No production	No production	14.4345	No production	222.676	No production	168.551	43.741	78.3532	No production	No production	No production	116.009	No production	175.868	No production	No production	No production	570.329	No production	No production	No production	No production	107.275	321.065
SLE	Sierra Leone	0	1	No production	0.0143637	No production	0	No production	No production	0	0	No production	No production	0	No production	No production	No production	0	No production	204.183	1.16091	No production	8.13518	No production	No production	6.43338	No production	No production	No production	0	0	No production	No production	No production	No production	No production	No production	No production	1348.03	No production	No production	No production	No production	No production	3508.19	No production	No production	No production	293.028
SVK	Slovakia	0.00925926	0.990741	109.741	No production	123.714	203.099	0.365421	197.076	537.73	43.9838	430.146	No production	No production	22.5012	291.155	4.71337	278.058	33.3178	No production	No production	No production	No production	No production	No production	No production	22.7589	No production	365.806	96.2023	253.727	668.134	No production	No production	572.626	No production	833.057	No production	2.89045	No production	No production	No production	1330.36	No production	No production	No production	No production	No production	645.903
SVN	Slovenia	0	1	28.8801	No production	31.5064	26.9746	0.770211	41.6559	87.3384	5.97834	120.427	No production	No production	1.91637	70.448	49.252	No production	9.40894	No production	No production	No production	No production	No production	No production	No production	3.26174	No production	32.3263	22.2094	52.2724	No production	No production	No production	No production	No production	No production	No production	No production	No production	No production	0	130.255	No production	No production	3.92907	No production	No production	98.0944
SOM	Somalia	0	1	885.098	No production	323.107	1093.92	No production	No production	1412.56	1386.87	No production	No production	No production	No production	No production	No production	No production	144.548	133.157	269.996	No production	No production	207.105	123.988	44.1709	No production	No production	1622.44	No production	No production	1621.41	1880.15	1675.6	No production	No production	No production	No production	3034.63	No production	No production	No production	No production	No production	No production	No production	No production	4584.83	No production
ZAF	South Africa	0.916482	0.0835176	413.979	No production	867.227	128.865	3519.87	292.313	767.558	101.74	No production	No production	No production	No production	No production	No production	1016.58	22.4246	156.417	64.7118	No production	No production	No production	99.5598	10.6127	No production	No production	183.698	No production	158.793	No production	605.123	No production	No production	No production	No production	515.758	1376.56	No production	No production	No production	No production	No production	No production	No production	No production	No production	518.65
KOR	Korea, Republic of	0	1	142.515	30.9523	109.466	12.0618	9.91722	No production	0.151748	0.137053	21.7241	No production	No production	No production	No production	No production	17.3876	1.66858	4.44344	No production	No production	No production	No production	No production	No production	No production	No production	8.98875	No production	No production	No production	No production	No production	No production	No production	No production	No production	171.405	No production	312.882	No production	No production	No production	No production	No production	No production	290.417	67.8694
ESP	Spain	0.732161	0.267839	258.068	472.865	238.067	224.689	868.78	413.568	No production	No production	No production	No production	No production	121.701	No production	1493.71	No production	62.0531	86.1225	No production	No production	No production	No production	No production	No production	40.9257	No production	1863.79	1475.7	1074.31	944.843	No production	No production	3983.06	No production	2174.18	2452.13	2220.66	No production	2191.42	6751.57	570.789	No production	No production	4108.6	No production	2113.3	1026.7
LKA	Sri Lanka	0.015544	0.984456	No production	828.21	No production	869.891	No production	No production	784.664	No production	No production	No production	No production	No production	No production	No production	No production	86.3655	38.7331	199.339	No production	No production	No production	No production	73.7021	No production	No production	889.675	No production	No production	No production	749.277	No production	No production	No production	No production	No production	No production	6407.4	No production	No production	No production	No production	No production	No production	No production	No production	235.98
SDN	Sudan	0.9378	0.0622003	1492.48	No production	52.5628	1025.19	No production	No production	757.39	1639.33	No production	No production	No production	No production	No production	No production	5.47966	31.9767	50.0279	5.59503	No production	No production	482.426	17.1882	60.5344	No production	No production	59.407	340.035	15.6322	8.65205	5.88118	15.3785	143.906	No production	19.1794	No production	2059.45	No production	No production	No production	No production	No production	No production	No production	No production	432.473	No production
SUR	Suriname	0	1	No production	705.647	No production	No production	No production	No production	No production	No production	No production	No production	No production	No production	No production	No production	No production	No production	No production	12.1053	No production	No production	No production	No production	62.2334	No production	No production	No production	No production	No production	No production	No production	No production	No production	No production	No production	No production	937.411	No production	No production	No production	No production	No production	No production	No production	No production	No production	0
SWZ	Swaziland	0.631579	0.368421	17.8928	No production	No production	221.376	No production	No production	No production	264.957	No production	No production	No production	No production	No production	No production	No production	333.052	235.371	No production	No production	No production	No production	39.5122	16.254	No production	No production	579.647	No production	No production	No production	309.75	No production	No production	No production	No production	No production	415.651	No production	No production	671.19	No production	No production	No production	No production	No production	No production	55.1869
SWE	Sweden	0	1	90.1528	No production	116.436	No production	24.3684	129.63	No production	No production	No production	No production	No production	0.11078	No production	84.0398	No production	17.5732	No production	No production	No production	No production	No production	No production	No production	13.2112	No production	No production	No production	109.982	No production	No production	No production	No production	No production	No production	No production	No production	No production	No production	No production	No production	No production	No production	No production	No production	No production	No production
CHE	Switzerland	0	1	29.5791	3.33804	25.9989	15.9821	3.12	29.5668	No production	No production	No production	No production	No production	0	No production	6.18213	No production	3.26823	No production	No production	No production	No production	No production	No production	No production	1.9351	No production	No production	No production	19.6723	No production	No production	No production	No production	No production	No production	No production	No production	No production	No production	2.9559	72.9193	No production	No production	11.6369	No production	No production	48.9091
SYR	Syria	0.998501	0.00149925	416.211	3607.92	1328.13	1114.51	No production	164.349	No production	3434.97	No production	No production	No production	No production	No production	No production	No production	157.456	No production	No production	No production	No production	No production	No production	No production	103.203	No production	1463.26	1399.18	1180.45	1750.75	No production	No production	5016.08	No production	3603.33	1349.17	534.01	No production	4218.26	1446.2	2870.12	2799.03	No production	3776.75	No production	2119.38	2284.23
TJK	Tajikistan	0.426386	0.573614	314.948	1472.11	446.909	807.628	No production	713.845	5301.55	No production	No production	No production	No production	No production	No production	No production	No production	241.411	No production	No production	No production	No production	No production	No production	No production	448.149	No production	No production	No production	3842.53	1834.54	No production	No production	15958.8	No production	No production	No production	2003.27	No production	No production	6818.22	No production	No production	No production	7015.7	No production	4863.16	274820
TZA	Tanzania, United Republic of	0.569369	0.430631	302.201	219.313	68.5034	133.095	No production	No production	77.851	73.6133	No production	No production	No production	No production	No production	No production	110.745	105.63	154.016	37.0757	No production	30.1659	12.4076	No production	8.80853	No production	No production	204.898	No production	305.063	119.381	327.142	180.361	No production	No production	No production	No production	1082.28	683.643	No production	No production	No production	No production	No production	No production	No production	775.14	385.256
THA	Thailand	0	1	1.05541	232.265	No production	21.9722	No production	No production	0	27.0045	No production	No production	No production	No production	332.703	No production	40.3921	185.008	194.963	21.2792	No production	No production	No production	No production	44.3847	No production	171.37	3.28816	No production	0	0	0	0	No production	No production	No production	No production	1701.93	2248.74	No production	No production	No production	No production	No production	No production	2488.01	2646.68	883.525
GMB	Gambia, The	0.972222	0.0277778	No production	137.297	No production	2.37188	No production	No production	0	1.29219	No production	No production	No production	No production	No production	No production	0	No production	No production	116.602	No production	No production	No production	No production	4.76909	No production	No production	No production	No production	No production	No production	0	No production	No production	No production	No production	No production	1603.61	1671.88	No production	No production	No production	No production	No production	No production	No production	426.218	No production
TGO	Togo	0.139535	0.860465	No production	22.7091	No production	47.2081	No production	No production	0	0.766847	No production	No production	0	No production	No production	No production	6.03228	No production	48.8859	9.67321	No production	48.3749	5.84567	No production	No production	No production	No production	31.1035	No production	No production	No production	No production	No production	No production	No production	No production	No production	357.802	56.5006	No production	No production	No production	No production	221.722	No production	No production	432.47	174.979
TTO	Trinidad and Tobago	0	1	No production	9.08507	No production	4.75376	No production	No production	No production	No production	No production	No production	No production	No production	No production	No production	No production	No production	No production	3.76422	0.681809	0.720925	No production	34.9946	3.1595	No production	No production	No production	No production	No production	No production	0	0.0206627	No production	No production	No production	No production	516.959	No production	No production	No production	No production	No production	No production	No production	No production	No production	No production
TUN	Tunisia	0.970856	0.0291439	208.562	No production	475.48	No production	No production	3139.69	No production	2575.42	No production	No production	No production	48.4894	No production	No production	1250.71	144.623	No production	No production	No production	No production	No production	No production	No production	73.7634	No production	No production	2212.33	1514.1	1029.36	No production	No production	4569.12	No production	No production	No production	1106.99	No production	No production	14207.7	No production	99205.9	No production	No production	No production	No production	No production
TUR	Turkey	0.752405	0.247595	244.005	439.14	198.183	584.201	535.232	288.575	1464.51	857.627	No production	No production	No production	3.69641	No production	No production	1936.71	68.5574	No production	No production	No production	No production	No production	No production	122.718	51.9777	No production	1279.86	721.113	73.7945	704.792	No production	No production	2712.01	No production	2398.33	No production	2430.79	No production	2380.72	1166.67	1683.2	2013.95	No production	2130.88	No production	1326.34	1339.4
TKM	Turkmenistan	1	0	944.94	6601.4	4371.35	6974.74	No production	No production	443.43	2337.06	No production	No production	No production	No production	No production	No production	2047.11	987.318	No production	No production	No production	No production	No production	No production	No production	915.89	No production	3078.95	1550.11	2795.57	5081.85	No production	No production	19198.2	No production	No production	No production	No production	No production	No production	11809.5	5750.89	No production	No production	No production	No production	No production	282.205
UGA	Uganda	0.194366	0.805634	19.8659	62.524	44.1981	31.443	No production	No production	17.451	18.4922	No production	No production	No production	No production	No production	No production	62.1536	22.0585	28.6783	7.46587	No production	30.2214	14.8117	No production	14.7598	No production	No production	52.888	24.0457	73.0349	11.7121	19.0405	24.9336	No production	No production	No production	No production	345.069	94.5931	No production	No production	No production	No production	No production	No production	No production	190.043	89.2504
UKR	Ukraine	0.384354	0.615646	166.395	574.771	196.143	258.174	0.135831	155.987	769.028	140.645	607.13	No production	No production	2.50547	350.919	20.9902	512.298	55.9026	No production	No production	No production	No production	No production	No production	No production	23.4501	No production	282.868	No production	370.483	No production	No production	No production	No production	No production	301.347	17.7427	11.6417	No production	No production	No production	665.908	No production	No production	No production	No production	No production	1124.74
ARE	United Arab Emirates	0	1	1444.04	No production	No production	No production	No production	No production	No production	1326.21	No production	No production	No production	No production	No production	No production	2498.45	120.141	No production	No production	No production	No production	No production	No production	No production	No production	No production	No production	No production	No production	No production	No production	No production	No production	No production	No production	No production	No production	No production	No production	No production	No production	No production	No production	No production	No production	No production	No production
GBR	United Kingdom	0	1	45.7489	No production	48.0022	No production	11.0091	50.7141	No production	No production	No production	No production	No production	6.35256e-05	No production	No production	No production	6.30416	No production	No production	No production	No production	No production	No production	No production	6.84506	No production	No production	32.1887	45.4522	No production	No production	No production	No production	No production	No production	No production	50.5632	No production	No production	No production	No production	No production	No production	No production	No production	No production	No production
USA	United States	0.490521	0.509479	379.094	656.089	313.828	170.071	342.833	265.112	1230.29	392.63	No production	No production	No production	No production	No production	49.1116	No production	85.363	121.129	No production	No production	No production	No production	No production	52.8131	55.9957	No production	943.452	No production	257.826	No production	433.885	No production	541.09	No production	No production	No production	No production	No production	No production	3221.31	3686.15	3982.67	No production	1300.32	No production	7640.99	577.433
URY	Uruguay	0	1	131.989	274.032	117.133	122.947	No production	345.191	No production	56.604	No production	No production	No production	No production	348.963	No production	No production	25.6414	19.3945	No production	No production	No production	No production	No production	38.3423	No production	No production	501.356	No production	No production	No production	No production	No production	No production	No production	No production	No production	No production	No production	No production	No production	No production	No production	No production	No production	No production	No production	458.528
UZB	Uzbekistan	0.972382	0.027618	685.868	3530.28	1529.57	1640.71	7.74167	1230.8	8963.96	1942.37	8537.28	No production	No production	No production	No production	No production	1882.08	418.65	No production	No production	No production	No production	No production	No production	No production	721.93	No production	No production	1432.88	6482.27	3265.64	No production	No production	20542.4	No production	No production	No production	2810.01	No production	No production	6804.66	4841.79	No production	No production	8985.34	No production	6332.71	449753
VEN	Venezuela	0.112101	0.887899	No production	44.1263	No production	94.6605	No production	No production	No production	23.0927	No production	No production	No production	No production	No production	No production	No production	116.241	No production	43.3918	12.9496	No production	57.7516	10.2976	34.246	No production	No production	167.111	No production	No production	No production	No production	7.30589	No production	No production	No production	No production	No production	No production	No production	No production	No production	No production	No production	No production	No production	No production	231.128
VNM	Vietnam	0	1	0.155596	37.2593	0.0222047	14.7732	44.4262	0	No production	No production	0	No production	No production	No production	No production	No production	No production	131.874	104.094	28.0858	No production	No production	No production	No production	23.5018	No production	No production	30.8077	0	0	No production	No production	No production	No production	No production	No production	No production	1559.39	680.823	No production	No production	No production	No production	No production	No production	No production	No production	339.884
WES	Vanuatu	0	1	457.862	No production	586.045	103.833	No production	No production	No production	No production	No production	No production	No production	No production	No production	No production	No production	36.6136	No production	No production	No production	No production	No production	No production	No production	No production	No production	No production	No production	No production	396.043	No production	No production	No production	No production	No production	No production	No production	No production	No production	1440.22	No production	No production	No production	No production	No production	No production	No production
YEM	Yemen	0.998453	0.00154679	1274.24	No production	1701.24	1293.78	No production	No production	2335.51	1965.38	No production	No production	No production	No production	No production	No production	No production	136.198	No production	No production	No production	No production	No production	No production	No production	No production	No production	890.458	1027.56	1091.35	788.405	No production	No production	3417.82	No production	No production	No production	761.009	No production	No production	No production	No production	No production	No production	No production	No production	No production	No production
ZMB	Zambia	0.462289	0.537711	11.0562	116.86	No production	101.311	No production	No production	10.1697	69.4478	No production	No production	No production	No production	No production	No production	No production	15.2056	25.3748	9.06697	No production	No production	No production	21.3592	3.19796	No production	No production	11.0167	No production	0	0	0	0	No production	No production	No production	No production	701.22	347.368	No production	No production	No production	No production	No production	No production	No production	339.378	557.189
ZWE	Zimbabwe	0.94702	0.0529801	26.2235	No production	15.2825	168.713	8113.51	625.865	271.303	256.086	No production	No production	No production	No production	No production	No production	526.246	28.3788	71.3862	75.2719	No production	No production	No production	22.1138	8.2648	No production	No production	188.454	No production	No production	No production	935.093	No production	No production	No production	No production	756.127	600.981	384.921	No production	No production	No production	No production	No production	No production	No production	No production	175.294
		Field application efficiencies (Ea)
		Surface, light soil	0.55
		Surface, medium soil	0.7
		Surface, heavy soil	0.6
		Surface, graded border	0.53
		Surface, basin and level border	0.58
		Surface, contour ditch	0.525
		Surface, furrow	0.57
		Surface, corrugation	0.6
		Subsurface	0.7
		Sprinkler, hot dry climate	0.6
		Sprinkler, moderate climate	0.7
		Sprinkler, humid and cool	0.8
		Rice	0.32
		Drip	0.9
[truncated: 629 more columns]

## Sheet: #4.Midpoint CFs subcountry - FI
		Units are dS/m*m3 soil/g salt in soil (electrical conductivity per g salt in 1 m3 soil)
SUB-COUNTRY REGION	ID	MEDIAN	MIN	MAX	RANGE	MEAN	STD	SUM
Medjerda	1	0.032852	0.00457811	0.0668605	0.0622824	0.0323389	0.0108084	10.7365
Chott Melhir, Chott Rharsa	2	0.098448	0.026053	1.00503	0.97898	0.188941	0.226254	242.412
Chott Djerid	3	0.962296	0.0350905	8.30413	8.26904	1.2541	0.99792	9133.65
Mediterranean Sea Coast (Western Part)	4	0.04719	0	0.170526	0.170526	0.0495404	0.0264728	117.411
Chott el Hodna	5	0.031124	0.0150174	0.0690276	0.0540102	0.0317668	0.00758928	9.84771
Chott ech Chergui	6	0.04787	0.0178262	0.0749303	0.0571041	0.046033	0.0118234	26.8372
Tafna	7	0.045297	0.0269796	0.0677688	0.0407892	0.0450449	0.0102507	3.69368
Moulouya	8	0.051595	0.0301149	0.0766648	0.04655	0.052875	0.0101114	35.5849
North-West Coast	9	0.353523	0.0173692	2.60935	2.59198	0.389308	0.323893	1806.39
Oued Guir, Oued Daoura, Oued Dra	10	0.293571	0.0531655	5.36592	5.31275	0.987329	1.37348	2561.13
Atui	11	0.484575	0.342456	1.61384	1.27139	0.631999	0.344768	156.104
Senegal	12	0.033456	0	1.02474	1.02474	0.129558	0.196279	437.259
Gambia	13	0.017298	0	0.0481313	0.0481313	0.0177209	0.0158915	9.21489
Geba(GW)/Kayanga(SG)	14	0	0	0.025543	0.025543	0.00341583	0.00837936	0.382573
Corubal(GW)/Koliba(GN)	15	0	0	0	0	0	0	0
South-West Coast	16	0	0	0.200791	0.200791	0.0130718	0.0357839	22.6927
Kolenta(GN)/Great Scarcies(SL)	17	0	0	0	0	0	0	0
Little Scarcies	18	0	0	0	0	0	0	0
Moa	19	0	0	0	0	0	0	0
Mano	20	0	0	0	0	0	0	0
Lofa	21	0	0	0	0	0	0	0
Saint Paul	22	0	0	0	0	0	0	0
Saint John	23	0	0	0	0	0	0	0
Cestos	24	0	0	0	0	0	0	0
Cavally	25	0	0	0	0	0	0	0
Gulf of Guinea	26	0	0	0.0273563	0.0273563	0.000456103	0.00289015	2.09306
Sassandra	27	0	0	0.0216774	0.0216774	8.40064e-05	0.00134411	0.0647689
Komoe	28	0	0	0.0499973	0.0499973	0.00211787	0.00725873	1.85737
Bia	29	0	0	0	0	0	0	0
Tano	30	0	0	0	0	0	0	0
Volta	31	0	0	0.126049	0.126049	0.00925368	0.0160863	39.0505
Mono	32	0	0	0.0230166	0.0230166	0.00225435	0.00589013	0.495957
Oueme	33	0	0	0.0183019	0.0183019	0.000957817	0.00337104	0.591931
Niger (except Benue)	34	0	0	1.29825	1.29825	0.0663451	0.138988	1094.69
Benue	35	0	0	0.0725818	0.0725818	0.00726	0.0134244	19.8488
Cross	36	0	0	0	0	0	0	0
Lake Chad	37	0.162257	0	8.89194	8.89194	0.751704	1.1332	16832.9
Sanaga	38	0	0	0.013926	0.013926	8.2511e-05	0.00106876	0.125334
Nyong	39	0	0	0.0115484	0.0115484	8.53331e-05	0.00098903	0.0346452
Ntem	40	0	0	0.0115484	0.0115484	5.93749e-05	0.00082593	0.0230968
Benito	41	0	0	0	0	0	0	0
Utamboni, M'Bei	42	0	0	0	0	0	0	0
Ogooue	43	0	0	0	0	0	0	0
Nyanga	44	0	0	0	0	0	0	0
Kouilou	45	0	0	0	0	0	0	0
Chiloango	46	0	0	0	0	0	0	0
Zaire(ZR)/Congo(CG)	47	0	0	0.0257934	0.0257934	0.000185394	0.00183257	3.00246
Sangha	48	0	0	0	0	0	0	0
Oubangui	49	0	0	0	0	0	0	0
Kwa	50	0	0	0.0163955	0.0163955	0.00111027	0.00386773	11.599
Ruki	51	0	0	0	0	0	0	0
Lomami	52	0	0	0	0	0	0	0
Lake Tanganyika	53	0	0	0.0244108	0.0244108	0.00151791	0.00472395	3.70826
Angola Coast	54	0	0	0.594849	0.594849	0.00950072	0.0295562	42.9718
Cunene	55	0	0	0.16745	0.16745	0.00758762	0.0185329	7.74696
Etosha	56	0.040006	0	0.132326	0.132326	0.0485434	0.0312129	68.6889
Okavango(NM)/Cubango(AN)	57	0.068142	0	0.145687	0.145687	0.061564	0.0488001	532.097
Namibia Coast	58	0.15851	0	10	10	0.303074	0.65893	852.546
Orange (Oranje)	59	0.115529	0	0.557128	0.557128	0.117014	0.0723514	1396.91
Cape Coast	60	0.026672	0	0.260044	0.260044	0.0392357	0.0416527	189.979
Mediterranean Sea Coast (Eastern Part)	61	4.41322	0.0254563	10	9.97454	4.96464	3.99341	104808
Nile	62	2.1521	0.0453768	10	9.95462	3.67736	3.54697	33541.2
Blue Nile/Bahr al-Azraq(SU)/Abbay(ET)	63	0.022031	0	0.192259	0.192259	0.0306219	0.0343046	119.578
Atbara	64	0.042464	0	0.87547	0.87547	0.124334	0.191809	225.169
Sobat	65	0.020616	0	0.036992	0.036992	0.0162724	0.0108059	45.6604
Bahr el Ghazel	66	0	0	0	0	0	0	0
Lake Mobutu-Sese Seko (Lake Albert)	67	0	0	0.0210902	0.0210902	0.00298283	0.00612341	2.0671
Lake Victoria	68	0	0	0.0280299	0.0280299	0.00653995	0.00990164	9.80338
Kagera	69	0	0	0.0158883	0.0158883	0.000576801	0.00269274	0.351849
Mara	70	0.014914	0	0.0197316	0.0197316	0.0126584	0.00619416	1.93674
Victoria Nile	71	0	0	0.0131137	0.0131137	5.16288e-05	0.000821207	0.0393412
White Nile, Bahr el Jebel	72	0.026487	0	0.384221	0.384221	0.0554125	0.0753879	591.584
Gash	73	0.100652	0	0.642769	0.642769	0.12073	0.108971	70.5061
Baraka	74	0.166221	0	0.388281	0.388281	0.171175	0.0994601	138.31
Read Sea Coast, Gulf of Aden	75	0.175982	0	10	10	0.626198	1.10124	1700.75
Awash	76	0.031392	0	0.100385	0.100385	0.0326098	0.0215566	31.8598
Wabi Shebelli	77	0.044537	0	0.18588	0.18588	0.0541644	0.0346408	371.351
Ogaden	78	0.155423	0.0227596	0.422296	0.399537	0.139656	0.0665034	243.84
Juba	79	0.041249	0	0.216916	0.216916	0.0509406	0.0382972	124.703
Lake Turkana (Lake Rudolf)	80	0.05154	0	0.131922	0.131922	0.0482439	0.032412	25.9552
Omo	81	0	0	0.0785838	0.0785838	0.0121758	0.0158132	11.847
Chewabahir (Lake Stephanie)	82	0.019042	0	0.0854665	0.0854665	0.0189017	0.0183249	11.1898
Lake Natron	83	0.02141	0	0.0435933	0.0435933	0.0198987	0.0117604	4.07924
Umba	84	0	0	0.00761413	0.00761413	0.000312703	0.00148429	0.014697
Great Ruaha	85	0	0	0.040193	0.040193	0.00731137	0.0101657	17.5911
Great Rift Valley	86	0	0	0.0476913	0.0476913	0.0113653	0.0134096	14.2749
Ruvuma	87	0	0	0.0212945	0.0212945	0.000764767	0.00332573	1.36281
Lake Rukwa	88	0	0	0.0239316	0.0239316	0.00346027	0.0078355	2.59866
Zambezi (except Shire)	89	0	0	0.0800879	0.0800879	0.00909489	0.0144621	120.78
Shire	90	0	0	0.0279667	0.0279667	0.00552508	0.00859482	6.90083
Pungue, Buzi	91	0	0	0.0440437	0.0440437	0.0032778	0.00770832	2.19285
Save(MZ)/Sabi(ZW)	92	0	0	0.10027	0.10027	0.0162991	0.0280662	21.5637
Limpopo	93	0.042498	0	0.142569	0.142569	0.0553248	0.0341266	279.224
Incomati	94	0.02255	0	0.059709	0.059709	0.0189495	0.0134634	11.3318
Umbeluzi	95	0.025459	0	0.065388	0.065388	0.0340435	0.0186771	3.60862
Maputo	96	0.017364	0	0.066273	0.066273	0.0139361	0.012546	5.30966
East Coast, South West Indian Ocean	97	0	0	0.681319	0.681319	0.0470646	0.1006	697.685
Nadym, Pur, Taz, Chatanga, Anabar, Olenok	98	0.011405	0	0.0193335	0.0193335	0.00910149	0.00558652	458.005
Jana, Indigirka, Kolyma	99	0.016208	0	0.0235933	0.0235933	0.0152481	0.0050234	295.218
Lake Chany, Lake Kulundinskoe	100	0.025882	0	0.0579631	0.0579631	0.0251892	0.00935145	51.9402
Arabian Sea	101	0.179359	0.0407499	0.551688	0.510938	0.210513	0.0757019	150.517
Korea (Southern Part)	102	0	0	0.0106801	0.0106801	0.00356004	0.00503465	1.75154
Mongolia (Internal Basins)	103	0.133248	0	1.84119	1.84119	0.19011	0.168646	4766.25
Shikoku	104	0.01068	0	0.0128813	0.0128813	0.00641298	0.00543184	1.01966
Kyushu	105	0	0	0.0128813	0.0128813	0.002606	0.00472414	0.810464
Honshu (Japan Sea Coast)	106	0	0	0.0128813	0.0128813	0.00372464	0.00551912	2.66684
Honshu (Pacific Coast)	107	0	0	0.0128813	0.0128813	0.00318539	0.00505897	3.87662
Hokkaido	108	0	0	0.0128813	0.0128813	0.00274649	0.00503592	1.46113
Xi	109	0	0	0.01266	0.01266	0.00031053	0.00175932	1.29864
Han	110	0	0	0.0172874	0.0172874	0.0037306	0.00586176	2.68976
Yangtze/Chang(CI),Siang	111	0	0	0.0202053	0.0202053	0.00391202	0.00571068	63.6681
Yellow River/Hwang(CI)	112	0.021832	0	0.205177	0.205177	0.0371682	0.0372272	320.613
Liao	113	0.024419	0.00893775	0.0307411	0.0218034	0.0226179	0.00570785	44.693
Han	114	0	0	0	0	0	0	0
Tumen	115	0.01582	0	0.0164774	0.0164774	0.0146612	0.00346129	1.56875
Red River/Hongha(VN)	116	0	0	0.0155662	0.0155662	0.00180953	0.00446326	3.3802
Ma	117	0	0	0.0129132	0.0129132	3.38042e-05	0.000659833	0.0129132
Ca	118	0	0	0	0	0	0	0
Vietnam (Middle Part)	119	0	0	0.0131137	0.0131137	0.000580651	0.00269552	0.261873
Vietnam (Southern Part)	120	0	0	0.0137147	0.0137147	0.00108952	0.00333621	1.08626
Mekong	121	0	0	0.0150739	0.0150739	0.000756356	0.00276376	6.42525
Gulf of Thailand,Pakchan	122	0	0	0.0182521	0.0182521	0.000810672	0.00319952	1.28005
Chao Phraya	123	0	0	0.018527	0.018527	0.00157652	0.00464769	3.53771
Tenannerim Coast	124	0	0	0.0129132	0.0129132	3.91904e-05	0.000710308	0.0258264
Salween	125	0	0	0.0152104	0.0152104	0.000942912	0.00316352	1.75004
Sittang	126	0	0	0.0157206	0.0157206	0.000395465	0.00230446	0.164909
Irrawaddy	127	0	0	0.0213875	0.0213875	0.00164727	0.00477755	8.01234
Kaladan, Arakan Coast	128	0	0	0.00948695	0.00948695	0.000148115	0.00112063	0.173591
Karnaphuli	129	0	0	0	0	0	0	0
Sri Lanka	130	0.012913	0	0.0352758	0.0352758	0.00974603	0.00761744	7.25105
Godavari	131	0.017649	0	0.0553545	0.0553545	0.0171024	0.0100404	59.1571
Mahanadi	132	0	0	0.0174829	0.0174829	0.00306989	0.00612774	4.82587
India (East Coast)	133	0.021388	0	0.0549824	0.0549824	0.0182104	0.0147646	141.968
India (West Coast)	134	0.02414	0	0.323522	0.323522	0.0482372	0.069362	332.113
Meghna	135	0	0	0.00948695	0.00948695	9.91321e-06	0.000306509	0.00948695
Kosi	136	0	0	0.0128813	0.0128813	0.00545945	0.00572959	2.89351
Gandak	137	0	0	0.0130331	0.0130331	0.00519599	0.00585604	2.8474
Ghaghra	138	0.011163	0	0.0163052	0.0163052	0.00772121	0.006456	11.6667
Yamuna	139	0.020957	0	0.105262	0.105262	0.0206371	0.0134874	83.6423
Ganges/Ganga(IN)	140	0	0	0.0206935	0.0206935	0.00667072	0.00722221	32.0395
Ulungur	141	0.107503	0	0.211143	0.211143	0.107755	0.0295523	107.431
Char Us Nuur	142	0.056013	0	0.145906	0.145906	0.0613026	0.0250628	114.023
Uvs Nuur	143	0.021856	0	0.0628409	0.0628409	0.024288	0.0107582	21.4706
Khuram	144	0.061833	0.0467674	0.0677866	0.0210192	0.0609059	0.00461105	2.98439
Gomal	145	0.106993	0.0652347	0.115332	0.0500976	0.103023	0.0114667	7.41766
Kabul	146	0.025926	0.011179	0.0497888	0.0386098	0.0271637	0.00979338	8.04046
Sutlej	147	0.07449	0	0.552059	0.552059	0.102027	0.101746	272.311
Ravi	148	0.027813	0	0.165107	0.165107	0.0518584	0.0491546	22.5584
Chenab	149	0.025282	0	0.269829	0.269829	0.051734	0.0534711	36.2138
Jhelum	150	0.018576	0	0.166043	0.166043	0.0316168	0.0298639	14.2908
Indus	151	0.230093	0	0.64207	0.64207	0.228604	0.153552	966.079
Pishin Lora	152	0.360842	0.105732	0.700496	0.594764	0.34217	0.121664	158.767
Dasht	153	0.073001	0.0550315	0.0970679	0.0420364	0.0737371	0.0112793	3.46564
Helmand	154	0.363369	0.0457227	1.27379	1.22806	0.404556	0.24926	409.815
Daryachech, Sistan	155	0.329171	0.0904812	1.53031	1.43983	0.383212	0.268242	469.818
Iran (Central Basin)	156	0.184041	0.0259923	1.64857	1.62258	0.260495	0.238774	2039.68
Iran (Persian Gulf Coast)	157	0.101453	0.0471616	0.261299	0.214138	0.110999	0.0369106	220
Karun	158	0.089751	0.0380958	0.238371	0.200275	0.0926482	0.0358252	92.5556
Lake Rezayeh	159	0.042285	0	0.0579958	0.0579958	0.0415809	0.0107918	16.0086
Caspian Sea (South Coast)	160	0.049357	0	0.255921	0.255921	0.0570637	0.0380608	72.9845
Tarim	161	0.408711	0	1.3322	1.3322	0.428693	0.186501	3399.11
Ural, Emba	162	0.057999	0	0.154511	0.154511	0.0629777	0.0260756	464.083
Atrek, Harirud(AH)/Tedzen(RS), Murgab	163	0.108413	0	0.327413	0.327413	0.121083	0.0524329	818.401
Amu Darya	164	0.098421	0	0.27508	0.27508	0.100432	0.0592425	317.467
Syr Darya	165	0.064505	0	0.246775	0.246775	0.088483	0.0666783	320.662
Chu, Talas, Asse, Lake Issykkul	166	0.068906	0	0.186071	0.186071	0.0847113	0.0552103	188.737
Lake Balkhash, Lake Alakol	167	0.050777	0	0.218551	0.218551	0.0582818	0.0366375	362.804
Central Kazakhstan	168	0.10854	0	0.277783	0.277783	0.107109	0.0479714	1811.64
Ob (Lower part), Tobol	169	0	0	0.0780251	0.0780251	0.00893179	0.0125571	127.582
Irtish	170	0.024918	0	0.117369	0.117369	0.0243109	0.0184136	435.384
Ob (Upper and middle part)	171	0	0	0.0519411	0.0519411	0.00325191	0.00648434	63.4057
Yenisey	172	0.011405	0	0.0226578	0.0226578	0.00755104	0.00632253	150.794
Angara	173	0	0	0.0208795	0.0208795	0.00307516	0.00644261	18.657
Lake Baikal	174	0.02052	0	0.0402132	0.0402132	0.0205581	0.00889494	37.2102
Japan Sea Coast	175	0.010087	0	0.0154371	0.0154371	0.00834517	0.00472623	2.33665
Sakhalin, Kuril Islands	176	0	0	0.00888541	0.00888541	0.000485338	0.00201913	0.346531
Lena	177	0.016664	0	0.0280195	0.0280195	0.0166931	0.00363393	542.494
Kamchatka	178	0	0	0	0	0	0	0
Okhotsk Sea, Bering Sea	179	0.008778	0	0.0173798	0.0173798	0.00645337	0.00607929	53.4726
Bo Hai Coast	180	0.019278	0.00914917	0.0310916	0.0219424	0.020067	0.00396823	66.9634
Korea (Northern Part)	181	0.01068	0	0.0155222	0.0155222	0.00896047	0.00431922	4.02325
Yalu(CI)/Amnok(KR)	182	0.011367	0.00932279	0.0113678	0.00204498	0.0108393	0.00077606	0.81295
South-East Coast	183	0	0	0.0131137	0.0131137	0.000785428	0.00266578	3.63889
Arabian Peninsula	184	0.499224	0	2.5644	2.5644	0.64372	0.472303	18173.5
Amur(RS)/Heilong(CI)	185	0.013874	0	0.0439055	0.0439055	0.0151287	0.0102248	284.979
Brahmaputra(IN)/Jamuna(BW)	186	0	0	0.0128813	0.0128813	0.00118297	0.00336523	3.47676
Euphrates-Tigris (see also VI.)	187	0.139373	0	0.572236	0.572236	0.182958	0.144954	1535.2
Caleufu, Corcovado, Palena,Manso,Futaleu	188	0.01068	0	0.0192818	0.0192818	0.00902536	0.00521401	2.31049
Gallegos, Chico	189	0.011241	0	0.0538243	0.0538243	0.0200996	0.0159426	3.01493
Lago Fagnano	190	0	0	0	0	0	0	0
Chile (Southern Part)	191	0	0	0.0745911	0.0745911	0.00917631	0.0149991	26.5012
Chile (Northern Part)	192	0.192312	0	10	10	0.66965	1.09767	2058.5
Puna Endorheic Basins,Salinas Grandes	193	0.038595	0.0151941	0.18938	0.174186	0.0463881	0.0293238	190.423
Laguna Merin	194	0.010903	0	0.011111	0.011111	0.00981298	0.00244749	2.88502
Uruguay	195	0.009738	0	0.0148167	0.0148167	0.00628839	0.00529759	24.2103
Paraguay (Lower Part)	196	0.020178	0	0.122614	0.122614	0.0215467	0.0170427	132.749
Paraguay (Middle Part)	197	0.01359	0	0.0576537	0.0576537	0.0167563	0.0148295	77.3469
Paraguay (Upper Part)	198	0	0	0.013622	0.013622	0.00547897	0.00557809	15.7082
Parana (between Paraguay and Uruguay)	199	0.014949	0	0.0786031	0.0786031	0.0173489	0.00840652	108.101
Parana (between Iguazu and Paraguay)	200	0	0	0.0132056	0.0132056	0.00312038	0.00494536	4.94269
Parana (between Paranapanema and Iguazu)	201	0	0	0	0	0	0	0
Parana (between Tiete and Paranapanema)	202	0	0	0	0	0	0	0
Parana (between Grande and Tiete)	203	0	0	0	0	0	0	0
Grande	204	0	0	0	0	0	0	0
Paranaiba	205	0	0	0	0	0	0	0
Rio de la Plata	206	0.012418	0	0.0178877	0.0178877	0.0123478	0.000960445	26.6342
Laguna Blanca,Cancosa,Todos los Santos,Lauca, Cosa Pilla	207	0.130038	0	0.444272	0.444272	0.132145	0.102545	124.084
Lago Titicaca, Lago de Poopo	208	0.036047	0	0.174755	0.174755	0.036084	0.0375734	23.0577
Brazil (South East)	209	0	0	0.0339674	0.0339674	0.00325659	0.00716623	9.33339
Brazil (East)	210	0	0	0.0512594	0.0512594	0.00488048	0.0108524	31.7182
Sao Francisco	211	0	0	0.0608163	0.0608163	0.00553773	0.0141136	36.848
Brazil (North and North East)	212	0	0	0.059249	0.059249	0.00505839	0.0120678	67.919
Tocantins	213	0	0	0.0102224	0.0102224	3.52792e-05	0.000599495	0.296451
Tumbes	214	0.029549	0.0222603	0.0424472	0.0201868	0.0302334	0.00613957	0.937236
Chira	215	0.039788	0.012861	2.49521	2.48235	0.196635	0.436653	20.0567
Peru (Pacific Ocean)	216	0.283552	0	10	10	1.16107	2.05426	1170.36
Ecuador (Pacific Ocean)	217	0	0	0.0871785	0.0871785	0.00743442	0.0106699	7.30804
Mira	218	0	0	0.0114425	0.0114425	0.00132661	0.00312935	0.159193
Patia	219	0	0	0.0112606	0.0112606	0.00315642	0.00461426	0.612345
Colombia (Pacific Ocean)	220	0	0	0.0128813	0.0128813	0.00158514	0.00397124	0.732334
Amazon (d/s Xingu confluence - mouth)	221	0	0	0	0	0	0	0
Amazon (d/s Tapajos confluence - d/s Xingu confluence)	222	0	0	0	0	0	0	0
Amazon (d/s Trombetas confluence - d/s Tapajos confluence)	223	0	0	0	0	0	0	0
Amazon (d/s Madeira confluence - d/s Trombetas confluence)	224	0	0	0	0	0	0	0
Amazon (d/s Negro confluence - d/s Madeira confluence)	225	0	0	0	0	0	0	0
Amazon (d/s Purus confluence - d/s Negro confluence)	226	0	0	0	0	0	0	0
Amazon (u/s Lago Coari - d/s Purus confluence)	227	0	0	0	0	0	0	0
Amazon (d/s Jutai confluence - u/s Lago Coari	228	0	0	0	0	0	0	0
Amazon (d/s Javari confluence - d/s Jutai confluence)	229	0	0	0	0	0	0	0
Amazon (headwaters - d/s Javari confluence)	230	0	0	0.0233192	0.0233192	0.00129205	0.00438452	9.34667
Caqueta(CO)/Japura(BZ)	231	0	0	0	0	0	0	0
Putumayo(CO)/Ica(BZ)	232	0	0	0	0	0	0	0
Napo	233	0	0	0	0	0	0	0
Negro	234	0	0	0	0	0	0	0
Mamore	235	0	0	0.0475575	0.0475575	0.00501875	0.0106451	33.6808
Beni	236	0	0	0.0431038	0.0431038	0.000447281	0.00383545	0.974625
Oyapock(FG)/Oiapoque(BZ)	237	0	0	0.0128813	0.0128813	0.000101567	0.00107974	0.0315874
French Guiana (Atlantic Ocean)	238	0	0	0.0128813	0.0128813	0.000579244	0.00266944	0.270507
Maroni(FG)/Marowijne(SM)	239	0	0	0.0131137	0.0131137	3.38477e-05	0.000662438	0.025995
Suriname (Atlantic Ocean)	240	0	0	0.0131401	0.0131401	0.000990506	0.00344345	0.764671
Courantijn(SM)/Corentyne(GY)	241	0	0	0.0128813	0.0128813	0.000204736	0.00161101	0.154575
Guyana (Atlantic Ocean)	242	0	0	0.0128813	0.0128813	0.00250357	0.00509719	0.79864
Essequibo, Amacuro, Barima	243	0	0	0.0128813	0.0128813	0.000120281	0.00105782	0.202072
Orinoco	244	0	0	0.0216231	0.0216231	0.000606847	0.0025863	6.40345
Venezuela (Caribbean Sea Coast)	245	0.005824	0	0.0794678	0.0794678	0.0127957	0.0155772	25.924
Catatumbo	246	0	0	0.013336	0.013336	0.0052286	0.00578367	1.18689
Magdalena	247	0	0	0.028567	0.028567	0.00604237	0.00671584	12.8642
Colombia (Caribbean Sea Coast)	248	0	0	0.0451988	0.0451988	0.00632139	0.0108065	6.34035
Lago San Martin(AG)/Lago O'Higgins(CH)	249	0.011373	0.0106801	0.0178608	0.00718071	0.0124558	0.0021618	0.373673
Lago Pueyrredon(AG)/Lago Cochrane(CH)	250	0.01191	0	0.0283335	0.0283335	0.0121787	0.00681819	0.755079
Patagonia (Internal Basins)	251	0.231383	0.0153894	0.477214	0.461825	0.233047	0.110259	108.367
Lago Buenos Airea(AG)/Lago General Carrera(CH), Baker	252	0.032658	0	0.0965102	0.0965102	0.0298801	0.0304375	2.56969
Patagonia (Atlantic Ocean)	253	0.118267	0	0.501127	0.501127	0.127589	0.0882808	662.951
Argentina (Atlantic Ocean)	254	0.049489	0	0.524993	0.524993	0.0832397	0.0815949	1042.33
Alaska (Arctic Ocean)	255	0.011739	0	0.023779	0.023779	0.0100122	0.00716466	88.6176
Alaska (Pacific Ocean)	256	0	0	0.0339674	0.0339674	0.00126856	0.00560708	10.817
Yukon	257	0.01068	0	0.0339792	0.0339792	0.00960966	0.0101288	181.421
Stikine	258	0.01068	0	0.0130549	0.0130549	0.00783366	0.0054045	3.45464
Canada (Pacific Ocean/South+North)	259	0	0	0.0156962	0.0156962	0.00101219	0.00351846	2.61853
Fraser	260	0.01302	0	0.053963	0.053963	0.0116293	0.00872355	43.6679
Mackenzie	261	0.01068	0	0.0306876	0.0306876	0.00824272	0.00819242	295.609
Canada (Arctic Ocean)	262	0.020678	0	0.0598604	0.0598604	0.0215416	0.00830691	1056.08
Nelson	263	0.018348	0	0.0636537	0.0636537	0.0157677	0.0111926	299.792
Hudson Bay	264	0	0	0.0243822	0.0243822	0.00642308	0.00732495	300.228
Columbia (except Snake)	265	0.01068	0	0.132391	0.132391	0.0164181	0.0218942	104.501
Snake	266	0.030292	0	0.148566	0.148566	0.0338942	0.0250978	148.762
USA (Internal Basins)	267	0.093188	0	1.13527	1.13527	0.134946	0.142311	1179.02
Upper Mississippi	268	0.012197	0	0.0212495	0.0212495	0.00795742	0.00706263	56.6409
Upper Missouri	269	0.033507	0	0.107971	0.107971	0.0358585	0.0115279	252.372
Middle Missouri	270	0.027522	0.013906	0.0634722	0.0495662	0.0284238	0.00868131	190.269
Lower Missouri	271	0.025577	0	0.0888408	0.0888408	0.0277048	0.0169941	223.771
Ohio	272	0	0	0.0148609	0.0148609	0.00173961	0.00424382	13.155
Arkansas	273	0.03026	0	0.114641	0.114641	0.0327817	0.0232023	199.214
Red	274	0.010502	0	0.0468349	0.0468349	0.0139562	0.0151946	45.246
Lower Mississippi	275	0	0	0.0144451	0.0144451	0.00196957	0.0042844	6.77138
St.John, St.Croix	276	0	0	0.0130208	0.0130208	0.00149635	0.00415266	1.48438
Lake Superior	277	0	0	0.0130208	0.0130208	0.000468067	0.00239918	0.979197
Lake Michigan	278	0	0	0.0154385	0.0154385	0.000734625	0.00312278	1.40166
Lake Huron	279	0	0	0.0147082	0.0147082	0.00236532	0.00489777	5.56087
Lake Erie	280	0	0	0.0143027	0.0143027	0.00489909	0.00598923	6.59907
Lake Ontario	281	0	0	0.0136106	0.0136106	0.00446049	0.00603737	4.01891
St.Lawrence	282	0	0	0.0130208	0.0130208	0.00156354	0.00398608	7.03281
Canada (Atlantic Ocean)	283	0	0	0.0130208	0.0130208	0.000396355	0.00223691	4.55729
USA (Pacific Ocean/North)	284	0	0	0.0231206	0.0231206	0.00022685	0.00200949	0.350483
USA (Pacific Ocean/South)	285	0.019546	0	0.0986598	0.0986598	0.0198526	0.019525	68.8685
USA (Atlantic Ocean/North)	286	0	0	0.0147772	0.0147772	0.000867791	0.00321837	4.75463
USA (Atlantic Ocean/South)	287	0	0	0.0129132	0.0129132	8.13607e-05	0.000930522	0.417218
USA (Gulf of Mexico/East)	288	0	0	0.011489	0.011489	0.000507125	0.00226051	2.46767
USA (Gulf of Mexico/West)	289	0.024071	0	0.0971078	0.0971078	0.0237549	0.0152687	161.225
Grande(US)/Bravo(MX)	290	0.053001	0.0187916	0.307852	0.289061	0.0706766	0.0406945	494.736
Colorado	291	0.070214	0.0147778	1.04345	1.02867	0.108942	0.113003	1017.41
Concepcion, Yagui	292	0.040099	0	0.459902	0.459902	0.0681819	0.0567997	84.2047
Tijuana	293	0.051765	0.0321769	0.0656003	0.0334234	0.0496652	0.00783956	2.43359
Mexico (Pacific Ocean/North)	294	0.083059	0	1.11743	1.11743	0.130924	0.1518	575.149
Mexico (Pacific Ocean/South)	295	0.009738	0	0.048407	0.048407	0.0102367	0.0117517	47.5702
Mexico (Internal Basins)	296	0.075603	0	0.20618	0.20618	0.0828586	0.039606	277.576
Mexico (Gulf of Mexico/North)	297	0.020215	0	0.0626867	0.0626867	0.0181108	0.0122479	32.2916
Mexico (Gulf of Mexico/South)	298	0.012854	0	0.0331434	0.0331434	0.0102537	0.00753984	20.2921
Hondo	299	0.010933	0	0.0130754	0.0130754	0.00962448	0.00362503	0.798832
Candelaria	300	0.010019	0	0.0119597	0.0119597	0.00930566	0.00300796	1.26557
Usumacinta-Grijalva	301	0	0	0.0192707	0.0192707	0.00424396	0.00578923	5.68691
Coatan, Suchiate	302	0.007537	0	0.0129132	0.0129132	0.00533119	0.00428878	0.101293
Lempa	303	0	0	0.0144185	0.0144185	0.000929749	0.0033011	0.197107
Paz	304	0	0	0.0131137	0.0131137	0.000846047	0.00322165	0.0262274
Motagua	305	0.010669	0	0.0184673	0.0184673	0.00677962	0.00618536	1.29491
Honduras (Caribbean Sea),Goascoran	306	0	0	0.0206549	0.0206549	0.00122491	0.00369445	1.0424
Coco	307	0	0	0.016898	0.016898	0.000434136	0.00234947	0.123729
Choluteca, Negro	308	0	0	0.0170974	0.0170974	0.006162	0.00694885	0.992082
Nicaragua (Pacific Ocean)	309	0	0	0.00973824	0.00973824	0.00272729	0.00389431	0.229093
Nicaragua (Caribbean Sea)	310	0	0	0.017056	0.017056	0.000789912	0.00268048	0.639829
San Juan	311	0	0	0.0180965	0.0180965	0.00396028	0.00592291	1.52471
Costa Rica (Pacific Ocean)	312	0	0	0.0131137	0.0131137	0.00493118	0.00587306	1.49908
Costa Rica (Caribbean Sea)	313	0	0	0.0131137	0.0131137	0.00153673	0.0035972	0.156747
Sixaola	314	0	0	0	0	0	0	0
Panama (Pacific Ocean)	315	0	0	0.0153585	0.0153585	0.00157255	0.0039509	0.959253
Panama (Caribbean Sea)	316	0	0	0	0	0	0	0
Bahamas	317	0.01225	0	0.0185247	0.0185247	0.0117685	0.00440379	1.28277
Cuba (North)	318	0.010293	0	0.0198088	0.0198088	0.00679021	0.00628156	3.34757
Cuba (South)	319	0	0	0.0192621	0.0192621	0.00524271	0.0059823	3.85863
Dominican Republic	320	0.011172	0	0.0238153	0.0238153	0.00913031	0.0066351	4.96689
Haiti	321	0.011172	0	0.0254516	0.0254516	0.00829922	0.00679567	2.58106
Jamaica	322	0	0	0.0212349	0.0212349	0.00575316	0.00655569	0.592575
Puerto Rico	323	0.01068	0	0.0192665	0.0192665	0.00874466	0.00512928	0.760785
Trinidad and Tobago	324	0	0	0.0128813	0.0128813	0.00267347	0.00522401	0.141694
Barbados	325	0	0	0	0	0	0	0
Guadeloupe, Martinique	326	0	0	0.0146465	0.0146465	0.00449687	0.0057139	0.103428
El Salvador (Pacific Ocean)	327	0	0	0.0159983	0.0159983	0.00551762	0.00618473	0.728326
Nacaome	328	0.011417	0	0.0166144	0.0166144	0.00755194	0.00734403	0.332285
Guatemala (Pacific Ocean)	329	0.007537	0	0.0147366	0.0147366	0.00526511	0.00552158	1.18465
Dulce	330	0.012913	0	0.0131137	0.0131137	0.010942	0.00466598	0.142246
Belize, Sarstun	331	0	0	0.0131137	0.0131137	0.00445449	0.00521304	1.04681
Changuinola	332	0	0	0	0	0	0	0
Australia (North-East Coast)	333	0.023415	0	0.0808238	0.0808238	0.0217964	0.0182651	114.649
Australia (South-East Coast)	334	0.013008	0	0.0510265	0.0510265	0.0117945	0.00992414	42.2599
Tasmania	335	0.009577	0	0.0220031	0.0220031	0.00627815	0.00631972	5.92658
Murray	336	0.045619	0	0.179773	0.179773	0.0538841	0.0355597	766.61
South Australian Gulf	337	0.08223	0	0.300435	0.300435	0.0841038	0.0771058	1220.68
Australia (South-West Coast)	338	0.044103	0	0.170727	0.170727	0.046456	0.0384305	165.569
Australia (Indian Ocean Coast)	339	0.098865	0	0.314821	0.314821	0.0951035	0.0807113	960.926
Australia (Timor Sea Coast)	340	0.030954	0	0.175986	0.175986	0.0326096	0.0335754	123.492
Australia (Gulf of Carpentaria)	341	0.022432	0	0.129972	0.129972	0.0274468	0.0290871	174.177
Lake Eyre	342	0.095763	0	0.33225	0.33225	0.0929838	0.0711069	1299.91
Bulloo-Bancannia	343	0.138771	0	0.282518	0.282518	0.135829	0.0628719	215.425
Australia (Western Plateau)	344	0	0	0.289765	0.289765	0.0440178	0.0701902	563.12
Golok	345	0	0	0	0	0	0	0
Perak	346	0	0	0.0128813	0.0128813	0.000611574	0.00273931	0.206101
Kelantan	347	0	0	0	0	0	0	0
Pahang	348	0	0	0	0	0	0	0
Trengganu	349	0	0	0.0131137	0.0131137	0.000231419	0.00172662	0.0393412
Langat, Klang, Selangor	350	0	0	0	0	0	0	0
Kerian	351	0	0	0.0128813	0.0128813	0.000733081	0.00298423	0.090169
Semberong, Johor	352	0	0	0.0131137	0.0131137	0.00097693	0.0034138	0.245209
Sarawak	353	0	0	0	0	0	0	0
Sabah	354	0	0	0.0110152	0.0110152	0.000110566	0.00109803	0.0881212
Singapore	355	0	0	0	0	0	0	0
Sembakung,Borneo (indon.Part)	356	0	0	0.0277531	0.0277531	0.00215879	0.0072324	13.201
Sumatra	357	0	0	0.0277531	0.0277531	0.000693479	0.00380364	3.44521
Java	358	0	0	0.0174754	0.0174754	0.00541725	0.00586459	6.63613
Bali, Lombok	359	0.007537	0	0.0137653	0.0137653	0.00604465	0.00511282	0.610509
Sumbawa	360	0.007537	0	0.0157316	0.0157316	0.00645331	0.00614769	2.09087
Timor	361	0.015279	0	0.022928	0.022928	0.0117254	0.0073016	1.77054
Sulawesi	362	0	0	0.0151117	0.0151117	0.00209496	0.00463184	5.28348
Tami	363	0	0	0.0128813	0.0128813	0.00107344	0.0035602	0.0386439
Sepik	364	0	0	0.0128813	0.0128813	0.00363757	0.00579868	3.28473
Fly	365	0	0	0.0128813	0.0128813	0.00283791	0.00533874	1.81626
New Guinea (Irian Jaya)	366	0	0	0.014039	0.014039	0.00210641	0.00476799	8.77107
New Guinea (Eastern Part)	367	0	0	0.0139982	0.0139982	0.00292815	0.00531868	7.80646
Luzon	368	0	0	0.0277531	0.0277531	0.00120121	0.00409972	1.4895
Palawan	369	0	0	0	0	0	0	0
Mindoro	370	0	0	0	0	0	0	0
Panay	371	0	0	0.00973824	0.00973824	0.00182592	0.00380095	0.233718
Negros	372	0	0	0.00973824	0.00973824	8.359e-05	0.00089835	0.0194765
Samar	373	0	0	0	0	0	0	0
Mindanao	374	0	0	0.0277531	0.0277531	0.000423094	0.00330318	0.45525
New Caledonia	375	0	0	0.0123657	0.0123657	0.00513589	0.00551966	1.08367
New Zealand (North Island I)	376	0	0	0.0142712	0.0142712	0.00118448	0.00362076	0.752145
New Zealand (North Island II)	377	0	0	0.0106801	0.0106801	0.000412758	0.00205862	0.0854409
New Zealand (North Island III)	378	0	0	0.0339674	0.0339674	0.00143076	0.00507212	1.07164
New Zealand (South Island I)	379	0	0	0.0203518	0.0203518	0.00172227	0.00506673	0.403012
New Zealand (South Island II)	380	0	0	0.0196176	0.0196176	0.0021896	0.0049132	1.09261
New Zealand (South Island III)	381	0	0	0.019768	0.019768	0.00241999	0.00542691	1.33099
New Zealand (South Island IV)	382	0	0	0	0	0	0	0
New Zealand (South Island V)	383	0	0	0.0138827	0.0138827	0.00049435	0.00230876	0.212571
Hawaii	384	0	0	0.0177538	0.0177538	0.00399164	0.00581818	0.175632
Fiji	385	0.011172	0	0.0111727	0.0111727	0.0100751	0.0030808	1.89412
Solomon Islands	386	0.011172	0	0.0129132	0.0129132	0.0087464	0.00429762	3.15745
Vanuatu	387	0.007537	0	0.0131137	0.0131137	0.00583131	0.00574935	0.66477
Cyprus	395	0.033392	0.0211597	0.0466776	0.0255179	0.0338558	0.00807151	2.70847
Internal Basins, Gulf of Aqaba	396	0.250148	0.020317	1.68074	1.66042	0.334671	0.321709	569.61
East Mediterranean Coast	397	0.030419	0.0154964	0.428542	0.413046	0.0691789	0.0877932	24.1434
Asi	398	0.042239	0.0154382	0.0670345	0.0515964	0.0417128	0.0132345	12.1384
Turkey (Mediterranean Sea Coast)	399	0.034716	0	0.0563201	0.0563201	0.0338046	0.0116923	36.8809
Turkey (Black Sea Coast)	400	0.032711	0	0.054027	0.054027	0.0294896	0.0113085	48.8348
Western Transcaucasus	401	0.019458	0	0.0194583	0.0194583	0.0112984	0.00960176	0.350249
Northern Caucasus	402	0.046281	0	0.0875792	0.0875792	0.0452756	0.0180429	109.205
Sea of Azov	403	0.023552	0	0.0447104	0.0447104	0.0248259	0.0106828	48.6835
Black Sea Coast (West of Dniepr)	405	0.014561	0	0.0429007	0.0429007	0.0164882	0.013638	21.7644
Lower Dniepr	406	0.012418	0	0.0409214	0.0409214	0.0179219	0.0128989	32.9405
Upper Dniepr, Bug	407	0.010132	0	0.0238964	0.0238964	0.0102937	0.0102494	62.277
Don	408	0.031746	0	0.0639554	0.0639554	0.0286648	0.0155874	151.493
Lower Volga	409	0.039351	0	0.118952	0.118952	0.0437473	0.0224351	125.599
Kama	410	0	0	0.034695	0.034695	0.00339636	0.00706246	27.3984
Upper Volga	411	0	0	0.026182	0.026182	0.00279135	0.0059226	40.2039
Neman	412	0	0	0.0207905	0.0207905	0.00360394	0.00678408	7.0421
Western Dvina, Rivers between Western Dvina and Neman	413	0	0	0.0194583	0.0194583	0.0014683	0.00433633	3.85723
Karelia, North-West Russia, Estonia	414	0	0	0	0	0	0	0
Kola Peninsula	415	0	0	0	0	0	0	0
Russia (Northern District)	416	0	0	0.0194583	0.0194583	0.00193866	0.00480994	48.6662
Rivers between Volga and Ural	417	0.052657	0.0340267	0.127357	0.0933307	0.0565182	0.0164937	63.3004
Turkey (Aegean Sea Coast)	418	0	0	0.0441646	0.0441646	0.0119479	0.01638	6.3085
Black Sea Coast (West)	419	0.021995	0	0.0460249	0.0460249	0.0226107	0.00988316	8.75035
Marica(BU)/Meric(TU)/Evros(GR)	420	0.026008	0	0.0356893	0.0356893	0.0231893	0.00809469	18.7137
Mesta(BU)/Nestos(GR), Struma(BU)/Strimon	421	0.028709	0.0194583	0.0391726	0.0197144	0.0298358	0.00484241	6.83239
Vardar(YG)/Axios(GR)	422	0.028952	0.00973824	0.0396221	0.0298838	0.0274708	0.009358	2.69214
Greece (South)	423	0.028398	0.0192979	0.0491286	0.0298307	0.0298775	0.00620466	9.17238
Greece (North)	424	0.027864	0	0.0396881	0.0396881	0.0258182	0.00964281	11.7731
Albania/Greece (Adriatic Coast)	425	0.019458	0	0.0223136	0.0223136	0.0179252	0.00373698	6.66819
Yugoslavia (Adriatic Coast)	426	0.011172	0.0111727	0.0194583	0.0082856	0.012757	0.0022442	1.30122
Wisla	427	0	0	0.0307176	0.0307176	0.00542293	0.00925643	17.7493
Odra(PL)/Oder(DL)	428	0	0	0.0367933	0.0367933	0.00563028	0.010432	11.5083
Baltic Sea Coast (East)	429	0	0	0.0277531	0.0277531	0.00606355	0.00903119	2.3466
Finland (Gulf of Finland)	430	0	0	0	0	0	0	0
Finland (Gulf of Bothnia)	431	0	0	0	0	0	0	0
Sicily	432	0.028413	0	0.0439874	0.0439874	0.0270075	0.00962697	9.69569
Italy (Adriatic Sea/Ionian Sea)	433	0.014543	0	0.0404166	0.0404166	0.014633	0.0101746	14.8817
Italy (Ligurian Sea/Tyrrhenian Sea)	434	0.01068	0	0.0264738	0.0264738	0.00961853	0.00610533	11.5038
Corsica, Sardinia	435	0.014137	0	0.0325588	0.0325588	0.0121739	0.00807442	5.62435
Venetian Coast	436	0.01068	0	0.015625	0.015625	0.0081032	0.00500163	3.50869
Po	437	0	0	0.0140459	0.0140459	0.004012	0.00522404	3.8114
Velika Morava	438	0.013175	0	0.0300667	0.0300667	0.0173479	0.00642678	2.89709
Drava(YG/HU)/Drau(OS)	439	0	0	0.0246213	0.0246213	0.00435953	0.00783336	2.11873
Sava	440	0.011172	0	0.0274351	0.0274351	0.0109697	0.00711612	10.0921
Tisza(HU)/Tisa(RS/YU)	441	0.017528	0	0.032532	0.032532	0.0155915	0.00745735	29.6862
Inn	442	0	0	0.00888541	0.00888541	0.000356605	0.00174397	0.106625
Danube/Donau(DL)/Duna(HU)/Dunav(YG/BU)/Dunarea(RO)	443	0.015054	0	0.0507253	0.0507253	0.0131051	0.010935	79.05
Baltic Sea Coast (West)	444	0	0	0.0281947	0.0281947	0.0034625	0.00772897	2.74922
Elbe(DL)/Labe(CZ)	445	0	0	0.0351234	0.0351234	0.00341364	0.0071665	8.32587
Rhone	446	0.01068	0	0.0326655	0.0326655	0.00870261	0.00801722	10.0689
North Sea Coast	447	0	0	0.0194583	0.0194583	0.00241589	0.00451204	2.25644
Weser	448	0	0	0.0194583	0.0194583	0.00252595	0.00508318	1.96014
Mosel(DL)/Moselle(FR)	449	0.008885	0	0.0111727	0.0111727	0.00541664	0.00527158	2.72999
Rhine/Rhein(DL) (except Mosel)	450	0	0	0.0235034	0.0235034	0.00273177	0.00536347	5.49632
Denmark	451	0	0	0.0128813	0.0128813	0.00389787	0.00525609	3.00136
Sweden	452	0	0	0.0126073	0.0126073	0.00138005	0.00357978	11.5151
Norway	453	0	0	0	0	0	0	0
Common to Norway-Finland-USSR	454	0	0	0	0	0	0	0
Common to Norway-Sweden	455	0	0	0.0106801	0.0106801	0.00167047	0.00366433	1.84587
France (Mediterranean Sea Coast)	456	0.01068	0	0.035485	0.035485	0.011287	0.011246	2.58471
Spain (South-East Coast)	457	0.023925	0	0.0808008	0.0808008	0.0250909	0.0119402	36.8586
Ebro	458	0.018891	0	0.0632665	0.0632665	0.0200418	0.0112503	24.4711
Garonne	459	0.01068	0	0.0239335	0.0239335	0.00795312	0.00630816	6.4977
Dordogne	460	0.008885	0	0.0194583	0.0194583	0.00506716	0.00509689	1.84951
Loire	461	0.008885	0	0.0231368	0.0231368	0.00614161	0.00583619	11.9086
Seine	462	0	0	0.0124315	0.0124315	0.00452253	0.00517607	4.92504
Meuse(FR)/Maas(NL)	463	0	0	0.0128813	0.0128813	0.00341448	0.00500581	1.62529
Escaut(FR)/Schelde(BX)	464	0	0	0.00948695	0.00948695	4.87761e-05	0.000678496	0.0189739
France (Atlantic Ocean Coast)	465	0.008885	0	0.0194583	0.0194583	0.0072264	0.00493086	4.88505
English Channel Coast	466	0	0	0.0194583	0.0194583	0.00432688	0.00490456	4.85908
Guadalquivir	467	0.024536	0	0.0697284	0.0697284	0.0230867	0.0100092	19.0234
Guadiana	468	0.026522	0	0.0623832	0.0623832	0.0239992	0.0127968	21.3113
Spain/Portugal (South Coast)	469	0	0	0.0744125	0.0744125	0.0166383	0.0208703	6.0397
Portugal (West Coast)	470	0	0	0.0216653	0.0216653	0.00673414	0.00733344	0.760958
Tajo(SP)/Tejo(PO)	471	0.023191	0	0.120219	0.120219	0.0217862	0.0174336	18.5183
Duero(SP)/Douro(PO)	472	0.017522	0	0.0812438	0.0812438	0.015472	0.0156743	15.2244
Mino(SP)/Minho(PO), Limia(SP)/Lima(PO)	473	0.010669	0.0106692	0.0106692	0	0.0106692	0	0.0106692
Spain (North and West Coast)	474	0.010669	0.0106692	0.0194583	0.00878911	0.0115368	0.00262115	1.75359
Central England	475	0	0	0.0277531	0.0277531	0.00241331	0.00782003	0.388544
Wales (except Severn)	476	0	0	0.0194583	0.0194583	9.80266e-05	0.00137761	0.0389166
South England	477	0	0	0.0194583	0.0194583	0.00260637	0.00568548	1.51951
East England	478	0	0	0.028267	0.028267	0.00521612	0.00959058	2.31074
North England	479	0	0	0.0277531	0.0277531	0.00285345	0.00714847	2.61376
Scotland	480	0	0	0.0106801	0.0106801	0.000635627	0.00252677	0.865089
Ireland (except Shannon)	481	0	0	0.0106801	0.0106801	0.0002962	0.00175377	0.373804
Shannon	482	0	0	0	0	0	0	0
Iceland	483	0	0	0	0	0	0	0
Kura	484	0.035282	0.0105725	0.0773814	0.0668089	0.0376935	0.0114753	42.8952
Euphrates-Tigris	485	0.038769	0.0239719	0.0429753	0.0190033	0.0370264	0.00481655	4.29507
Greenland	486	0.013297	0.0121548	2.88379	2.87164	0.354227	0.783426	4944.66

## Sheet: #5.Midpoint CFs subcountry - II
		Units are dS/m*m3 soil/g salt in soil (electrical conductivity per g salt in 1 m3 soil)
SUB-COUNTRY REGION	ID	MEDIAN	MIN	MAX	RANGE	MEAN	STD	SUM
Medjerda	1	0.032401	0.00436584	0.0698996	0.0655338	0.0325089	0.0110127	10.793
Chott Melhir, Chott Rharsa	2	0.098712	0.0259838	1.0423	1.01631	0.193487	0.236857	248.244
Chott Djerid	3	0.97633	0.0353196	8.68159	8.64627	1.29491	1.04762	9430.84
Mediterranean Sea Coast (Western Part)	4	0.047186	0	0.178277	0.178277	0.0499091	0.0270138	118.285
Chott el Hodna	5	0.031656	0.0143872	0.0721652	0.057778	0.0318445	0.00798869	9.87178
Chott ech Chergui	6	0.04743	0.0170781	0.0737584	0.0566803	0.0459175	0.0117489	26.7699
Tafna	7	0.044121	0.028709	0.0677688	0.0390598	0.0448905	0.00958838	3.68102
Moulouya	8	0.050788	0.0296439	0.0754658	0.0458219	0.0521734	0.00987916	35.1127
North-West Coast	9	0.35489	0.0191828	2.7061	2.68692	0.394914	0.332346	1832.4
Oued Guir, Oued Daoura, Oued Dra	10	0.308126	0.0535127	5.60982	5.55631	1.03118	1.43631	2674.88
Atui	11	0.487739	0.341303	1.67368	1.33238	0.641469	0.365052	158.443
Senegal	12	0.033199	0	1.07132	1.07132	0.133093	0.204941	449.188
Gambia	13	0.017901	0	0.0468817	0.0468817	0.0174501	0.0155122	9.07403
Geba(GW)/Kayanga(SG)	14	0	0	0.025543	0.025543	0.00341583	0.00837936	0.382573
Corubal(GW)/Koliba(GN)	15	0	0	0	0	0	0	0
South-West Coast	16	0	0	0.205537	0.205537	0.0131962	0.036354	22.9085
Kolenta(GN)/Great Scarcies(SL)	17	0	0	0	0	0	0	0
Little Scarcies	18	0	0	0	0	0	0	0
Moa	19	0	0	0	0	0	0	0
Mano	20	0	0	0	0	0	0	0
Lofa	21	0	0	0	0	0	0	0
Saint Paul	22	0	0	0	0	0	0	0
Saint John	23	0	0	0	0	0	0	0
Cestos	24	0	0	0	0	0	0	0
Cavally	25	0	0	0	0	0	0	0
Gulf of Guinea	26	0	0	0.0265006	0.0265006	0.000455273	0.0028853	2.08925
Sassandra	27	0	0	0.0216774	0.0216774	8.40064e-05	0.00134411	0.0647689
Komoe	28	0	0	0.0522699	0.0522699	0.00212581	0.00734447	1.86434
Bia	29	0	0	0	0	0	0	0
Tano	30	0	0	0	0	0	0	0
Volta	31	0	0	0.129028	0.129028	0.00924557	0.0161959	39.0163
Mono	32	0	0	0.0222966	0.0222966	0.00217531	0.00570197	0.478568
Oueme	33	0	0	0.0184923	0.0184923	0.000949716	0.00338341	0.586925
Niger (except Benue)	34	0	0	1.30989	1.30989	0.0680105	0.143542	1122.17
Benue	35	0	0	0.0742973	0.0742973	0.00719639	0.0133441	19.6749
Cross	36	0	0	0	0	0	0	0
Lake Chad	37	0.165435	0	9.29611	9.29611	0.772699	1.16589	17303.1
Sanaga	38	0	0	0.0133547	0.0133547	7.91259e-05	0.00102491	0.120192
Nyong	39	0	0	0.0118371	0.0118371	8.74664e-05	0.00101376	0.0355114
Ntem	40	0	0	0.0118371	0.0118371	6.08592e-05	0.000846578	0.0236742
Benito	41	0	0	0	0	0	0	0
Utamboni, M'Bei	42	0	0	0	0	0	0	0
Ogooue	43	0	0	0	0	0	0	0
Nyanga	44	0	0	0	0	0	0	0
Kouilou	45	0	0	0	0	0	0	0
Chiloango	46	0	0	0	0	0	0	0
Zaire(ZR)/Congo(CG)	47	0	0	0.0261556	0.0261556	0.000188981	0.00186777	3.06054
Sangha	48	0	0	0	0	0	0	0
Oubangui	49	0	0	0	0	0	0	0
Kwa	50	0	0	0.0167979	0.0167979	0.00113593	0.0039585	11.867
Ruki	51	0	0	0	0	0	0	0
Lomami	52	0	0	0	0	0	0	0
Lake Tanganyika	53	0	0	0.0247536	0.0247536	0.00152848	0.00476014	3.73408
Angola Coast	54	0	0	0.603202	0.603202	0.00971795	0.0303371	43.9543
Cunene	55	0	0	0.175621	0.175621	0.00768542	0.0189302	7.84681
Etosha	56	0.040447	0	0.135454	0.135454	0.0497138	0.0319889	70.345
Okavango(NM)/Cubango(AN)	57	0.069752	0	0.149131	0.149131	0.0631554	0.0498698	545.852
Namibia Coast	58	0.157677	0	10	10	0.307847	0.682973	865.972
Orange (Oranje)	59	0.114138	0	0.564952	0.564952	0.116467	0.0721028	1390.38
Cape Coast	60	0.026065	0	0.247562	0.247562	0.0377233	0.0396074	182.656
Mediterranean Sea Coast (Eastern Part)	61	4.48777	0.0262041	10	9.9738	5.00402	4.00664	105640
Nile	62	2.15971	0.0434726	10	9.95653	3.68077	3.54943	33572.3
Blue Nile/Bahr al-Azraq(SU)/Abbay(ET)	63	0.022328	0	0.194959	0.194959	0.0309758	0.0346264	120.961
Atbara	64	0.042845	0	0.915264	0.915264	0.125554	0.194984	227.378
Sobat	65	0.020772	0	0.0375442	0.0375442	0.0164664	0.01095	46.2048
Bahr el Ghazel	66	0	0	0	0	0	0	0
Lake Mobutu-Sese Seko (Lake Albert)	67	0	0	0.0213863	0.0213863	0.00303258	0.0062243	2.10158
Lake Victoria	68	0	0	0.0284235	0.0284235	0.00661076	0.0100112	9.90954
Kagera	69	0	0	0.0159281	0.0159281	0.000591192	0.00275592	0.360627
Mara	70	0.015089	0	0.0200087	0.0200087	0.0128136	0.00625964	1.96048
Victoria Nile	71	0	0	0.0132979	0.0132979	5.23538e-05	0.000832739	0.0398936
White Nile, Bahr el Jebel	72	0.026656	0	0.393302	0.393302	0.056295	0.0767764	601.006
Gash	73	0.102048	0	0.671986	0.671986	0.119633	0.107085	69.8659
Baraka	74	0.166854	0	0.388281	0.388281	0.171759	0.0991804	138.781
Read Sea Coast, Gulf of Aden	75	0.179471	0	10	10	0.629483	1.10272	1709.67
Awash	76	0.030996	0	0.0962662	0.0962662	0.0319171	0.0208782	31.183
Wabi Shebelli	77	0.045236	0	0.194329	0.194329	0.0547303	0.0348985	375.231
Ogaden	78	0.155423	0.0239575	0.441492	0.417534	0.140274	0.0659334	244.918
Juba	79	0.042734	0	0.222044	0.222044	0.0519014	0.0389158	127.055
Lake Turkana (Lake Rudolf)	80	0.052153	0	0.12559	0.12559	0.048281	0.0319449	25.9752
Omo	81	0	0	0.0785838	0.0785838	0.0123158	0.0159593	11.9833
Chewabahir (Lake Stephanie)	82	0.018618	0	0.0854665	0.0854665	0.0188565	0.0183995	11.163
Lake Natron	83	0.021506	0	0.043878	0.043878	0.0200965	0.0118203	4.11978
Umba	84	0	0	0.00726124	0.00726124	0.00029821	0.0014155	0.0140159
Great Ruaha	85	0	0	0.0420295	0.0420295	0.00740255	0.0103532	17.8105
Great Rift Valley	86	0	0	0.048361	0.048361	0.0115423	0.0136211	14.4972
Ruvuma	87	0	0	0.0222674	0.0222674	0.000776912	0.00339434	1.38446
Lake Rukwa	88	0	0	0.0248359	0.0248359	0.00354027	0.00802537	2.65875
Zambezi (except Shire)	89	0	0	0.0819809	0.0819809	0.00932702	0.0147858	123.863
Shire	90	0	0	0.0286536	0.0286536	0.0056598	0.00883826	7.06909
Pungue, Buzi	91	0	0	0.0456768	0.0456768	0.00335701	0.00789002	2.24584
Save(MZ)/Sabi(ZW)	92	0	0	0.103988	0.103988	0.0166877	0.0289566	22.0778
Limpopo	93	0.042874	0	0.145939	0.145939	0.0566744	0.0356311	286.036
Incomati	94	0.02261	0	0.061923	0.061923	0.0189784	0.0136032	11.3491
Umbeluzi	95	0.025237	0	0.0678125	0.0678125	0.0346772	0.0196993	3.67578
Maputo	96	0.017082	0	0.0687303	0.0687303	0.0138796	0.0125792	5.28815
East Coast, South West Indian Ocean	97	0	0	0.681319	0.681319	0.0468782	0.100093	694.923
Nadym, Pur, Taz, Chatanga, Anabar, Olenok	98	0.010775	0	0.0202169	0.0202169	0.00909305	0.0055311	457.58
Jana, Indigirka, Kolyma	99	0.015945	0	0.0236182	0.0236182	0.0149218	0.00479044	288.901
Lake Chany, Lake Kulundinskoe	100	0.025613	0	0.0574621	0.0574621	0.0250189	0.00929645	51.589
Arabian Sea	101	0.173945	0.0390399	0.576765	0.537725	0.211566	0.0747925	151.27
Korea (Southern Part)	102	0	0	0.0107759	0.0107759	0.00359195	0.00507979	1.76724
Mongolia (Internal Basins)	103	0.132187	0	1.84119	1.84119	0.188246	0.167355	4719.52
Shikoku	104	0.010775	0	0.0134698	0.0134698	0.00650618	0.00552431	1.03448
Kyushu	105	0	0	0.0134698	0.0134698	0.00265065	0.00481359	0.824353
Honshu (Japan Sea Coast)	106	0	0	0.0134698	0.0134698	0.00383401	0.00569591	2.74515
Honshu (Pacific Coast)	107	0	0	0.0134698	0.0134698	0.00324515	0.00516424	3.94935
Hokkaido	108	0	0	0.0134698	0.0134698	0.00283069	0.00520195	1.50593
Xi	109	0	0	0.0126918	0.0126918	0.0003087	0.00174919	1.29098
Han	110	0	0	0.0170064	0.0170064	0.00369045	0.00579132	2.66082
Yangtze/Chang(CI),Siang	111	0	0	0.020256	0.020256	0.00393112	0.00573554	63.9789
Yellow River/Hwang(CI)	112	0.021933	0	0.205177	0.205177	0.0364786	0.0360389	314.664
Liao	113	0.0241	0.00856268	0.0298812	0.0213185	0.0223763	0.00559278	44.2156
Han	114	0	0	0	0	0	0	0
Tumen	115	0.0157	0	0.0163525	0.0163525	0.0146298	0.00338633	1.56539
Red River/Hongha(VN)	116	0	0	0.0156053	0.0156053	0.001824	0.00449696	3.40723
Ma	117	0	0	0.0127033	0.0127033	3.32546e-05	0.000649104	0.0127033
Ca	118	0	0	0	0	0	0	0
Vietnam (Middle Part)	119	0	0	0.0132979	0.0132979	0.000587069	0.00272555	0.264768
Vietnam (Southern Part)	120	0	0	0.0139073	0.0139073	0.00108498	0.00332417	1.08172
Mekong	121	0	0	0.0155167	0.0155167	0.000780282	0.00285359	6.62849
Gulf of Thailand,Pakchan	122	0	0	0.019086	0.019086	0.000815059	0.00322154	1.28698
Chao Phraya	123	0	0	0.0193735	0.0193735	0.00163079	0.00481541	3.65949
Tenannerim Coast	124	0	0	0.0127033	0.0127033	3.85531e-05	0.000698759	0.0254065
Salween	125	0	0	0.0156572	0.0156572	0.00097061	0.00325645	1.80145
Sittang	126	0	0	0.0154649	0.0154649	0.000391345	0.00227956	0.163191
Irrawaddy	127	0	0	0.0210398	0.0210398	0.00162266	0.00470957	7.89263
Kaladan, Arakan Coast	128	0	0	0.00976562	0.00976562	0.000149984	0.00114136	0.175781
Karnaphuli	129	0	0	0	0	0	0	0
Sri Lanka	130	0.012703	0	0.0361096	0.0361096	0.00965056	0.00759225	7.18002
Godavari	131	0.017658	0	0.0561807	0.0561807	0.0171723	0.0101411	59.3989
Mahanadi	132	0	0	0.0171986	0.0171986	0.00304144	0.00606422	4.78114
India (East Coast)	133	0.021247	0	0.0540884	0.0540884	0.0181476	0.0147085	141.479
India (West Coast)	134	0.02433	0	0.338228	0.338228	0.0490982	0.0721507	338.041
Meghna	135	0	0	0.00976562	0.00976562	1.02044e-05	0.000315513	0.00976562
Kosi	136	0	0	0.0134698	0.0134698	0.00557071	0.0058636	2.95248
Gandak	137	0	0	0.0134698	0.0134698	0.00533637	0.00602716	2.92433
Ghaghra	138	0.011259	0	0.0164514	0.0164514	0.00783278	0.00655038	11.8353
Yamuna	139	0.021038	0	0.110047	0.110047	0.0207738	0.0137663	84.1962
Ganges/Ganga(IN)	140	0	0	0.0208791	0.0208791	0.00676573	0.0073068	32.4958
Ulungur	141	0.107136	0	0.211143	0.211143	0.107405	0.0295282	107.082
Char Us Nuur	142	0.055182	0	0.143686	0.143686	0.0605513	0.0245493	112.625
Uvs Nuur	143	0.021532	0	0.0618846	0.0618846	0.0239362	0.0104975	21.1596
Khuram	144	0.060228	0.0467674	0.0660267	0.0192593	0.0593495	0.00441804	2.90813
Gomal	145	0.106993	0.0652347	0.115332	0.0500977	0.103023	0.0114667	7.41766
Kabul	146	0.02561	0.0112793	0.0487181	0.0374389	0.0271661	0.00991617	8.04115
Sutlej	147	0.07449	0	0.577152	0.577152	0.104641	0.106388	279.287
Ravi	148	0.026781	0	0.165107	0.165107	0.0517633	0.0492711	22.517
Chenab	149	0.024455	0	0.282094	0.282094	0.0521477	0.0544647	36.5034
Jhelum	150	0.01881	0	0.17359	0.17359	0.0317476	0.0305311	14.3499
Indus	151	0.235116	0	0.671255	0.671255	0.235154	0.160075	993.762
Pishin Lora	152	0.364441	0.101295	0.732337	0.631042	0.346876	0.125452	160.95
Dasht	153	0.075145	0.0566481	0.0999193	0.0432712	0.0759031	0.0116106	3.56745
Helmand	154	0.368096	0.0470658	1.3039	1.25683	0.408083	0.253051	413.388
Daryachech, Sistan	155	0.325051	0.0904812	1.56648	1.476	0.380705	0.273877	466.744
Iran (Central Basin)	156	0.17879	0.0249259	1.72351	1.69858	0.259916	0.247079	2035.15
Iran (Persian Gulf Coast)	157	0.10054	0.0496437	0.261299	0.211655	0.11101	0.035723	220.022
Karun	158	0.084102	0.0362672	0.249206	0.212939	0.089096	0.0368328	89.0069
Lake Rezayeh	159	0.04051	0	0.055795	0.055795	0.0400851	0.0104544	15.4328
Caspian Sea (South Coast)	160	0.047762	0	0.267553	0.267553	0.0552701	0.0375983	70.6905
Tarim	161	0.413421	0	1.3322	1.3322	0.43518	0.187302	3450.55
Ural, Emba	162	0.057808	0	0.15216	0.15216	0.0624166	0.025585	459.948
Atrek, Harirud(AH)/Tedzen(RS), Murgab	163	0.109329	0	0.327413	0.327413	0.121109	0.0528493	818.573
Amu Darya	164	0.099286	0	0.281582	0.281582	0.101144	0.0600915	319.716
Syr Darya	165	0.064924	0	0.246775	0.246775	0.0886003	0.0670122	321.087
Chu, Talas, Asse, Lake Issykkul	166	0.06957	0	0.186071	0.186071	0.0846456	0.0551508	188.59
Lake Balkhash, Lake Alakol	167	0.050268	0	0.218551	0.218551	0.0579312	0.0365726	360.622
Central Kazakhstan	168	0.10636	0	0.277783	0.277783	0.105429	0.0478086	1783.22
Ob (Lower part), Tobol	169	0	0	0.0773508	0.0773508	0.00900136	0.0125881	128.575
Irtish	170	0.024755	0	0.117369	0.117369	0.0242731	0.0183078	434.706
Ob (Upper and middle part)	171	0	0	0.0514922	0.0514922	0.00332774	0.00661396	64.8843
Yenisey	172	0.010775	0	0.0225506	0.0225506	0.00723003	0.00605865	144.384
Angara	173	0	0	0.0208795	0.0208795	0.00305843	0.00641592	18.5555
Lake Baikal	174	0.020547	0	0.0390884	0.0390884	0.0203589	0.00866319	36.8496
Japan Sea Coast	175	0.010717	0	0.0153201	0.0153201	0.00878387	0.00490969	2.45948
Sakhalin, Kuril Islands	176	0	0	0.00944109	0.00944109	0.00051569	0.0021454	0.368202
Lena	177	0.015787	0	0.0292997	0.0292997	0.0159582	0.00361899	518.608
Kamchatka	178	0	0	0	0	0	0	0
Okhotsk Sea, Bering Sea	179	0.009084	0	0.0181738	0.0181738	0.00666732	0.00629115	55.2454
Bo Hai Coast	180	0.019205	0.00876523	0.0309445	0.0221793	0.0199349	0.00396256	66.5229
Korea (Northern Part)	181	0.010775	0	0.0154045	0.0154045	0.00903646	0.00434938	4.05737
Yalu(CI)/Amnok(KR)	182	0.011281	0.00924556	0.0112816	0.00203603	0.0107936	0.000768296	0.809523
South-East Coast	183	0	0	0.0134698	0.0134698	0.000782677	0.0026591	3.62614
Arabian Peninsula	184	0.505243	0	2.68097	2.68097	0.655597	0.493734	18508.8
Amur(RS)/Heilong(CI)	185	0.013904	0	0.0426774	0.0426774	0.0150787	0.00998336	284.038
Brahmaputra(IN)/Jamuna(BW)	186	0	0	0.0134698	0.0134698	0.00120333	0.00342463	3.53658
Euphrates-Tigris (see also VI.)	187	0.138709	0	0.537902	0.537902	0.180707	0.143964	1516.31
Caleufu, Corcovado, Palena,Manso,Futaleu	188	0.010775	0	0.0194547	0.0194547	0.00910627	0.00526076	2.33121
Gallegos, Chico	189	0.010926	0	0.0562835	0.0562835	0.020086	0.0161592	3.0129
Lago Fagnano	190	0	0	0	0	0	0	0
Chile (Southern Part)	191	0	0	0.0733783	0.0733783	0.00921672	0.0150413	26.6179
Chile (Northern Part)	192	0.18776	0	10	10	0.661615	1.09022	2033.8
Puna Endorheic Basins,Salinas Grandes	193	0.039187	0.0151223	0.18938	0.174258	0.0459118	0.0287164	188.468
Laguna Merin	194	0.01085	0	0.011057	0.011057	0.00992286	0.00243713	2.91732
Uruguay	195	0.010179	0	0.0154936	0.0154936	0.0063788	0.00537044	24.5584
Paraguay (Lower Part)	196	0.020338	0	0.122614	0.122614	0.0214656	0.0164027	132.25
Paraguay (Middle Part)	197	0.014118	0	0.0561569	0.0561569	0.0167998	0.0144544	77.5477
Paraguay (Upper Part)	198	0	0	0.0144784	0.0144784	0.00582342	0.00592877	16.6957
Parana (between Paraguay and Uruguay)	199	0.014978	0	0.0738869	0.0738869	0.0173617	0.00804549	108.18
Parana (between Iguazu and Paraguay)	200	0	0	0.0138089	0.0138089	0.00324725	0.00514492	5.14365
Parana (between Paranapanema and Iguazu)	201	0	0	0	0	0	0	0
Parana (between Tiete and Paranapanema)	202	0	0	0	0	0	0	0
Parana (between Grande and Tiete)	203	0	0	0	0	0	0	0
Grande	204	0	0	0	0	0	0	0
Paranaiba	205	0	0	0	0	0	0	0
Rio de la Plata	206	0.012309	0	0.0181389	0.0181389	0.0122846	0.000966462	26.4979
Laguna Blanca,Cancosa,Todos los Santos,Lauca, Cosa Pilla	207	0.126617	0	0.444272	0.444272	0.129927	0.102029	122.002
Lago Titicaca, Lago de Poopo	208	0.035111	0	0.174755	0.174755	0.0357293	0.0374074	22.831
Brazil (South East)	209	0	0	0.0355114	0.0355114	0.00337023	0.00745642	9.65909
Brazil (East)	210	0	0	0.0504259	0.0504259	0.00480656	0.0106813	31.2378
Sao Francisco	211	0	0	0.0598274	0.0598274	0.00545766	0.0139056	36.3152
Brazil (North and North East)	212	0	0	0.0582856	0.0582856	0.00498269	0.0118972	66.9026
Tocantins	213	0	0	0.0109649	0.0109649	3.78415e-05	0.000643037	0.317982
Tumbes	214	0.028781	0.0216824	0.0443865	0.0227041	0.0302576	0.00661992	0.937986
Chira	215	0.039529	0.0127985	2.60863	2.59583	0.202909	0.455665	20.6967
Peru (Pacific Ocean)	216	0.293977	0	10	10	1.20571	2.12314	1215.36
Ecuador (Pacific Ocean)	217	0	0	0.0847399	0.0847399	0.00743611	0.0105594	7.3097
Mira	218	0	0	0.011404	0.011404	0.00131465	0.00310829	0.157758
Patia	219	0	0	0.0109456	0.0109456	0.00305721	0.00447895	0.593098
Colombia (Pacific Ocean)	220	0	0	0.0134698	0.0134698	0.00163104	0.00412583	0.753541
Amazon (d/s Xingu confluence - mouth)	221	0	0	0	0	0	0	0
Amazon (d/s Tapajos confluence - d/s Xingu confluence)	222	0	0	0	0	0	0	0
Amazon (d/s Trombetas confluence - d/s Tapajos confluence)	223	0	0	0	0	0	0	0
Amazon (d/s Madeira confluence - d/s Trombetas confluence)	224	0	0	0	0	0	0	0
Amazon (d/s Negro confluence - d/s Madeira confluence)	225	0	0	0	0	0	0	0
Amazon (d/s Purus confluence - d/s Negro confluence)	226	0	0	0	0	0	0	0
Amazon (u/s Lago Coari - d/s Purus confluence)	227	0	0	0	0	0	0	0
Amazon (d/s Jutai confluence - u/s Lago Coari	228	0	0	0	0	0	0	0
Amazon (d/s Javari confluence - d/s Jutai confluence)	229	0	0	0	0	0	0	0
Amazon (headwaters - d/s Javari confluence)	230	0	0	0.0232059	0.0232059	0.0012804	0.00433954	9.26242
Caqueta(CO)/Japura(BZ)	231	0	0	0	0	0	0	0
Putumayo(CO)/Ica(BZ)	232	0	0	0	0	0	0	0
Napo	233	0	0	0	0	0	0	0
Negro	234	0	0	0	0	0	0	0
Mamore	235	0	0	0.0463228	0.0463228	0.00508699	0.0106797	34.1388
Beni	236	0	0	0.0419848	0.0419848	0.000437054	0.00374326	0.95234
Oyapock(FG)/Oiapoque(BZ)	237	0	0	0.0134698	0.0134698	0.000104566	0.00112071	0.03252
French Guiana (Atlantic Ocean)	238	0	0	0.0134698	0.0134698	0.00060571	0.0027914	0.282866
Maroni(FG)/Marowijne(SM)	239	0	0	0.0134698	0.0134698	3.48538e-05	0.000682116	0.0267677
Suriname (Atlantic Ocean)	240	0	0	0.0137404	0.0137404	0.00102555	0.00356521	0.791723
Courantijn(SM)/Corentyne(GY)	241	0	0	0.0134698	0.0134698	0.00021409	0.00168461	0.161638
Guyana (Atlantic Ocean)	242	0	0	0.0134698	0.0134698	0.00261796	0.00533008	0.835129
Essequibo, Amacuro, Barima	243	0	0	0.0134698	0.0134698	0.00012061	0.00107914	0.202625
Orinoco	244	0	0	0.0205852	0.0205852	0.000605708	0.00258903	6.39143
Venezuela (Caribbean Sea Coast)	245	0.00558	0	0.0782585	0.0782585	0.0125788	0.0151245	25.4846
Catatumbo	246	0	0	0.0134698	0.0134698	0.00522066	0.00577842	1.18509
Magdalena	247	0	0	0.0298722	0.0298722	0.00614177	0.0068548	13.0758
Colombia (Caribbean Sea Coast)	248	0	0	0.0453929	0.0453929	0.00634139	0.0107351	6.36042
Lago San Martin(AG)/Lago O'Higgins(CH)	249	0.011475	0.0107759	0.0177334	0.00695751	0.0125258	0.00209831	0.375773
Lago Pueyrredon(AG)/Lago Cochrane(CH)	250	0.012016	0	0.027541	0.027541	0.01207	0.00662222	0.748341
Patagonia (Internal Basins)	251	0.2175	0.0149589	0.448581	0.433622	0.21918	0.103462	101.919
Lago Buenos Airea(AG)/Lago General Carrera(CH), Baker	252	0.032951	0	0.10092	0.10092	0.0300745	0.0308422	2.58641
Patagonia (Atlantic Ocean)	253	0.117249	0	0.471059	0.471059	0.122036	0.0822628	634.1
Argentina (Atlantic Ocean)	254	0.049097	0	0.503654	0.503654	0.0815686	0.0786126	1021.4
Alaska (Arctic Ocean)	255	0.012148	0	0.0246085	0.0246085	0.0103614	0.00741459	91.7089
Alaska (Pacific Ocean)	256	0	0	0.0355114	0.0355114	0.00130144	0.00578371	11.0974
Yukon	257	0.010775	0	0.0342838	0.0342838	0.00974767	0.0102695	184.026
Stikine	258	0.010775	0	0.0131719	0.0131719	0.00790389	0.00545296	3.48562
Canada (Pacific Ocean/South+North)	259	0	0	0.0156962	0.0156962	0.00101219	0.00351846	2.61853
Fraser	260	0.01302	0	0.0534967	0.0534967	0.0116262	0.00870895	43.6562
Mackenzie	261	0.010775	0	0.0304224	0.0304224	0.00831414	0.00827553	298.17
Canada (Arctic Ocean)	262	0.021186	0	0.0613151	0.0613151	0.0220706	0.00850954	1082.01
Nelson	263	0.018361	0	0.0631036	0.0631036	0.0157178	0.0111142	298.842
Hudson Bay	264	0	0	0.0243822	0.0243822	0.00650874	0.00742815	304.231
Columbia (except Snake)	265	0.010775	0	0.128954	0.128954	0.0162213	0.0215626	103.249
Snake	266	0.029987	0	0.148566	0.148566	0.0332645	0.0246249	145.998
USA (Internal Basins)	267	0.089586	0	1.06715	1.06715	0.128869	0.1335	1125.93
Upper Mississippi	268	0.01217	0	0.0216594	0.0216594	0.00798203	0.00709824	56.8161
Upper Missouri	269	0.033848	0	0.106328	0.106328	0.0358956	0.0114675	252.633
Middle Missouri	270	0.02761	0.0138737	0.0625063	0.0486326	0.0282504	0.00852681	189.108
Lower Missouri	271	0.025303	0	0.0874889	0.0874889	0.0273455	0.016705	220.87
Ohio	272	0	0	0.0150696	0.0150696	0.00174001	0.00423752	13.1579
Arkansas	273	0.030076	0	0.107762	0.107762	0.0324981	0.0225307	197.491
Red	274	0.011034	0	0.0455248	0.0455248	0.0136768	0.0148418	44.3403
Lower Mississippi	275	0	0	0.0143356	0.0143356	0.00203324	0.0044112	6.99029
St.John, St.Croix	276	0	0	0.0130208	0.0130208	0.00149635	0.00415266	1.48438
Lake Superior	277	0	0	0.0130208	0.0130208	0.000468525	0.00240113	0.980154
Lake Michigan	278	0	0	0.0156553	0.0156553	0.000740631	0.00315095	1.41312
Lake Huron	279	0	0	0.0149148	0.0149148	0.00238101	0.00492972	5.59776
Lake Erie	280	0	0	0.0149562	0.0149562	0.0050304	0.00612892	6.77594
Lake Ontario	281	0	0	0.0136106	0.0136106	0.00446743	0.00604456	4.02516
St.Lawrence	282	0	0	0.0134698	0.0134698	0.00158646	0.00404807	7.13591
Canada (Atlantic Ocean)	283	0	0	0.0130208	0.0130208	0.000396355	0.00223691	4.55729
USA (Pacific Ocean/North)	284	0	0	0.0234657	0.0234657	0.000229499	0.0020343	0.354576
USA (Pacific Ocean/South)	285	0.019284	0	0.103167	0.103167	0.01986	0.0196444	68.8944
USA (Atlantic Ocean/North)	286	0	0	0.0145369	0.0145369	0.000857605	0.00317839	4.69882
USA (Atlantic Ocean/South)	287	0	0	0.0127033	0.0127033	8.62504e-05	0.000986077	0.442292
USA (Gulf of Mexico/East)	288	0	0	0.0116604	0.0116604	0.000518998	0.00231012	2.52544
USA (Gulf of Mexico/West)	289	0.02383	0	0.0971078	0.0971078	0.0237693	0.0154524	161.322
Grande(US)/Bravo(MX)	290	0.054447	0.0185152	0.321846	0.30333	0.0700908	0.0401067	490.636
Colorado	291	0.070892	0.0147454	0.980841	0.966095	0.10525	0.105747	982.926
Concepcion, Yagui	292	0.039819	0	0.432308	0.432308	0.0655598	0.0529755	80.9664
Tijuana	293	0.051077	0.0338704	0.0645336	0.0306632	0.049919	0.00689612	2.44603
Mexico (Pacific Ocean/North)	294	0.082778	0	1.05039	1.05039	0.127503	0.145549	560.122
Mexico (Pacific Ocean/South)	295	0.009674	0	0.0470529	0.0470529	0.0101604	0.0116135	47.2153
Mexico (Internal Basins)	296	0.073027	0	0.198532	0.198532	0.0812588	0.0386525	272.217
Mexico (Gulf of Mexico/North)	297	0.020353	0	0.0635669	0.0635669	0.0178647	0.0119507	31.8527
Mexico (Gulf of Mexico/South)	298	0.012703	0	0.0336088	0.0336088	0.0102661	0.00754031	20.3167
Hondo	299	0.010862	0	0.0131082	0.0131082	0.00958333	0.00360495	0.795417
Candelaria	300	0.010566	0	0.011882	0.011882	0.00968258	0.00308013	1.31683
Usumacinta-Grijalva	301	0	0	0.0194435	0.0194435	0.00429745	0.00584917	5.75859
Coatan, Suchiate	302	0.007512	0	0.0127033	0.0127033	0.00530109	0.00425505	0.100721
Lempa	303	0	0	0.014621	0.014621	0.000939724	0.00333924	0.199222
Paz	304	0	0	0.0132979	0.0132979	0.000857927	0.00326689	0.0265957
Motagua	305	0.010738	0	0.0185879	0.0185879	0.00687655	0.00628398	1.31342
Honduras (Caribbean Sea),Goascoran	306	0	0	0.0215986	0.0215986	0.00125426	0.00380452	1.06738
Coco	307	0	0	0.0170495	0.0170495	0.000435207	0.00235993	0.124034
Choluteca, Negro	308	0	0	0.0172506	0.0172506	0.00619465	0.0069945	0.997338
Nicaragua (Pacific Ocean)	309	0	0	0.00967492	0.00967492	0.00271557	0.00387663	0.228108
Nicaragua (Caribbean Sea)	310	0	0	0.0172089	0.0172089	0.000784107	0.00266229	0.635127
San Juan	311	0	0	0.0182587	0.0182587	0.00395508	0.00592303	1.52271
Costa Rica (Pacific Ocean)	312	0	0	0.0132979	0.0132979	0.00489528	0.00582333	1.48817
Costa Rica (Caribbean Sea)	313	0	0	0.0132979	0.0132979	0.00152974	0.00358606	0.156034
Sixaola	314	0	0	0	0	0	0	0
Panama (Pacific Ocean)	315	0	0	0.0151088	0.0151088	0.00155639	0.00390903	0.949395
Panama (Caribbean Sea)	316	0	0	0	0	0	0	0
Bahamas	317	0.012894	0	0.0196832	0.0196832	0.012408	0.00465997	1.35247
Cuba (North)	318	0.010225	0	0.020087	0.020087	0.00679499	0.00629605	3.34993
Cuba (South)	319	0	0	0.0194348	0.0194348	0.00524456	0.00598296	3.86
Dominican Republic	320	0.0112	0	0.0249034	0.0249034	0.00920601	0.00669474	5.00807
Haiti	321	0.0112	0	0.0266145	0.0266145	0.00836627	0.00687951	2.60191
Jamaica	322	0	0	0.0222051	0.0222051	0.00584319	0.00669171	0.601849
Puerto Rico	323	0.010775	0	0.0201468	0.0201468	0.0088414	0.00521703	0.769201
Trinidad and Tobago	324	0	0	0.0134698	0.0134698	0.00279562	0.0054627	0.148168
Barbados	325	0	0	0	0	0	0	0
Guadeloupe, Martinique	326	0	0	0.0153157	0.0153157	0.00457551	0.00584635	0.105237
El Salvador (Pacific Ocean)	327	0	0	0.016223	0.016223	0.00553443	0.00621266	0.730545
Nacaome	328	0.011387	0	0.0166561	0.0166561	0.007573	0.00736972	0.333212
Guatemala (Pacific Ocean)	329	0.007512	0	0.0149436	0.0149436	0.00529306	0.00556982	1.19094
Dulce	330	0.012703	0	0.0132979	0.0132979	0.0107946	0.00460554	0.14033
Belize, Sarstun	331	0	0	0.0132979	0.0132979	0.00446206	0.00522567	1.04858
Changuinola	332	0	0	0	0	0	0	0
Australia (North-East Coast)	333	0.023889	0	0.0759744	0.0759744	0.0217545	0.0175543	114.429
Australia (South-East Coast)	334	0.013363	0	0.0479649	0.0479649	0.0120112	0.0099971	43.0362
Tasmania	335	0.010179	0	0.0216453	0.0216453	0.00654039	0.00658893	6.17413
Murray	336	0.045384	0	0.168986	0.168986	0.0522748	0.0329854	743.714
South Australian Gulf	337	0.078758	0	0.282409	0.282409	0.0806623	0.0735675	1170.73
Australia (South-West Coast)	338	0.046034	0	0.160483	0.160483	0.0456651	0.0361244	162.751
Australia (Indian Ocean Coast)	339	0.099921	0	0.295931	0.295931	0.0937415	0.0782776	947.164
Australia (Timor Sea Coast)	340	0.031178	0	0.180145	0.180145	0.0319733	0.0326743	121.083
Australia (Gulf of Carpentaria)	341	0.021591	0	0.122173	0.122173	0.0271484	0.0285632	172.284
Lake Eyre	342	0.094758	0	0.312315	0.312315	0.090782	0.0683639	1269.13
Bulloo-Bancannia	343	0.131325	0	0.265567	0.265567	0.129742	0.0581513	205.771
Australia (Western Plateau)	344	0	0	0.272379	0.272379	0.0425442	0.0678714	544.268
Golok	345	0	0	0	0	0	0	0
Perak	346	0	0	0.0134698	0.0134698	0.000639517	0.00286447	0.215517
Kelantan	347	0	0	0	0	0	0	0
Pahang	348	0	0	0	0	0	0	0
Trengganu	349	0	0	0.0132979	0.0132979	0.000234668	0.00175086	0.0398936
Langat, Klang, Selangor	350	0	0	0	0	0	0	0
Kerian	351	0	0	0.0134698	0.0134698	0.000766575	0.00312058	0.0942888
Semberong, Johor	352	0	0	0.0134698	0.0134698	0.00101826	0.00355819	0.255583
Sarawak	353	0	0	0	0	0	0	0
Sabah	354	0	0	0.0113636	0.0113636	0.000114064	0.00113277	0.0909091
Singapore	355	0	0	0	0	0	0	0
Sembakung,Borneo (indon.Part)	356	0	0	0.0284091	0.0284091	0.00221091	0.0074051	13.5197
Sumatra	357	0	0	0.0284091	0.0284091	0.000700409	0.00386389	3.47963
Java	358	0	0	0.0182738	0.0182738	0.00545595	0.0059323	6.68354
Bali, Lombok	359	0.007512	0	0.0138887	0.0138887	0.00606838	0.00515146	0.612907
Sumbawa	360	0.007512	0	0.0154758	0.0154758	0.00638187	0.00607498	2.06773
Timor	361	0.015067	0	0.0239756	0.0239756	0.0116711	0.0073113	1.76234
Sulawesi	362	0	0	0.0151081	0.0151081	0.00210163	0.0046474	5.30031
Tami	363	0	0	0.0134698	0.0134698	0.00112249	0.00372286	0.0404095
Sepik	364	0	0	0.0134698	0.0134698	0.00380377	0.00606362	3.43481
Fly	365	0	0	0.0134698	0.0134698	0.00296757	0.00558267	1.89925
New Guinea (Irian Jaya)	366	0	0	0.0146805	0.0146805	0.00215423	0.00487861	8.97023
New Guinea (Eastern Part)	367	0	0	0.0146377	0.0146377	0.00304812	0.00554481	8.12628
Luzon	368	0	0	0.0284091	0.0284091	0.00121112	0.0041601	1.50179
Palawan	369	0	0	0	0	0	0	0
Mindoro	370	0	0	0	0	0	0	0
Panay	371	0	0	0.00967492	0.00967492	0.00181405	0.00377624	0.232198
Negros	372	0	0	0.00967492	0.00967492	8.30465e-05	0.000892509	0.0193498
Samar	373	0	0	0	0	0	0	0
Mindanao	374	0	0	0.0284091	0.0284091	0.000432004	0.00337823	0.464836
New Caledonia	375	0	0	0.0124766	0.0124766	0.00516244	0.00554785	1.08927
New Zealand (North Island I)	376	0	0	0.0149233	0.0149233	0.00120943	0.00370096	0.767989
New Zealand (North Island II)	377	0	0	0.0107759	0.0107759	0.000416458	0.00207708	0.0862069
New Zealand (North Island III)	378	0	0	0.0355114	0.0355114	0.00149346	0.00529324	1.1186
New Zealand (South Island I)	379	0	0	0.0205343	0.0205343	0.00173771	0.00511216	0.406625
New Zealand (South Island II)	380	0	0	0.0197935	0.0197935	0.00225404	0.00505875	1.12476
New Zealand (South Island III)	381	0	0	0.0203934	0.0203934	0.00246046	0.0055179	1.35325
New Zealand (South Island IV)	382	0	0	0	0	0	0	0
New Zealand (South Island V)	383	0	0	0.0140072	0.0140072	0.000498783	0.00232946	0.214477
Hawaii	384	0	0	0.0177125	0.0177125	0.0040017	0.00583502	0.176075
Fiji	385	0.0112	0	0.0112007	0.0112007	0.0101209	0.00309272	1.90273
Solomon Islands	386	0.0112	0	0.0134698	0.0134698	0.00881461	0.00435841	3.18207
Vanuatu	387	0.007512	0	0.0132979	0.0132979	0.00589182	0.00582506	0.671667
Cyprus	395	0.033412	0.0213494	0.0472953	0.0259459	0.034083	0.00812645	2.72664
Internal Basins, Gulf of Aqaba	396	0.241066	0.0202631	1.72046	1.7002	0.319774	0.313125	544.255
East Mediterranean Coast	397	0.030588	0.0154018	0.428542	0.41314	0.0692788	0.0878636	24.1783
Asi	398	0.041874	0.0153378	0.0664552	0.0511174	0.0409624	0.0127132	11.9201
Turkey (Mediterranean Sea Coast)	399	0.033861	0	0.0554631	0.0554631	0.0326396	0.0109936	35.6098
Turkey (Black Sea Coast)	400	0.031223	0	0.0532048	0.0532048	0.0283565	0.0108769	46.9583
Western Transcaucasus	401	0.01929	0	0.0192901	0.0192901	0.0112007	0.00951878	0.347222
Northern Caucasus	402	0.04548	0	0.0868224	0.0868224	0.0446961	0.0176229	107.807
Sea of Azov	403	0.023348	0	0.044324	0.044324	0.0248506	0.0103791	48.732
Black Sea Coast (West of Dniepr)	405	0.014989	0	0.0425299	0.0425299	0.0166141	0.0134696	21.9306
Lower Dniepr	406	0.012789	0	0.0405677	0.0405677	0.0180097	0.0126863	33.1018
Upper Dniepr, Bug	407	0.010624	0	0.0236899	0.0236899	0.0102335	0.0101622	61.9128
Don	408	0.031379	0	0.0634027	0.0634027	0.0286231	0.0152539	151.273
Lower Volga	409	0.038858	0	0.117924	0.117924	0.0433109	0.0220888	124.345
Kama	410	0	0	0.0343952	0.0343952	0.0034303	0.0070797	27.6722
Upper Volga	411	0	0	0.0259558	0.0259558	0.00285704	0.00601411	41.15
Neman	412	0	0	0.0206108	0.0206108	0.00366592	0.00685575	7.16321
Western Dvina, Rivers between Western Dvina and Neman	413	0	0	0.0192901	0.0192901	0.00151849	0.00446576	3.98906
Karelia, North-West Russia, Estonia	414	0	0	0	0	0	0	0
Kola Peninsula	415	0	0	0	0	0	0	0
Russia (Northern District)	416	0	0	0.0192901	0.0192901	0.00197291	0.00487816	49.5258
Rivers between Volga and Ural	417	0.053108	0.0329956	0.126257	0.0932612	0.0561935	0.0159638	62.9367
Turkey (Aegean Sea Coast)	418	0	0	0.0437829	0.0437829	0.0118548	0.0162403	6.25933
Black Sea Coast (West)	419	0.022545	0	0.0456271	0.0456271	0.0226498	0.0097438	8.76547
Marica(BU)/Meric(TU)/Evros(GR)	420	0.025783	0	0.0353809	0.0353809	0.0229738	0.00802643	18.5399
Mesta(BU)/Nestos(GR), Struma(BU)/Strimon	421	0.028501	0.0192901	0.0388341	0.019544	0.0295948	0.00479464	6.77721
Vardar(YG)/Axios(GR)	422	0.028952	0.00967492	0.0392796	0.0296047	0.0273732	0.00928471	2.68257
Greece (South)	423	0.028199	0.0192979	0.0487041	0.0294061	0.0296756	0.0061357	9.11042
Greece (North)	424	0.027623	0	0.0393451	0.0393451	0.0257027	0.0094338	11.7204
Albania/Greece (Adriatic Coast)	425	0.01929	0	0.0221207	0.0221207	0.0178698	0.00349147	6.64757
Yugoslavia (Adriatic Coast)	426	0.0112	0.0112007	0.0192901	0.0080894	0.0127168	0.00220739	1.29712
Wisla	427	0	0	0.0314437	0.0314437	0.00539137	0.00920027	17.646
Odra(PL)/Oder(DL)	428	0	0	0.037663	0.037663	0.00562782	0.0104494	11.5033
Baltic Sea Coast (East)	429	0	0	0.0284091	0.0284091	0.00609818	0.00910846	2.35999
Finland (Gulf of Finland)	430	0	0	0	0	0	0	0
Finland (Gulf of Bothnia)	431	0	0	0	0	0	0	0
Sicily	432	0.028812	0	0.0436073	0.0436073	0.0272883	0.00969613	9.79649
Italy (Adriatic Sea/Ionian Sea)	433	0.014794	0	0.0400673	0.0400673	0.0147257	0.01014	14.976
Italy (Ligurian Sea/Tyrrhenian Sea)	434	0.010775	0	0.026245	0.026245	0.00967685	0.00612391	11.5735
Corsica, Sardinia	435	0.014316	0	0.0322774	0.0322774	0.0123012	0.00813718	5.68316
Venetian Coast	436	0.010775	0	0.015625	0.015625	0.00817585	0.00504613	3.54014
Po	437	0	0	0.0146876	0.0146876	0.00408192	0.00531738	3.87783
Velika Morava	438	0.013203	0	0.0298069	0.0298069	0.0172582	0.00632802	2.88212
Drava(YG/HU)/Drau(OS)	439	0	0	0.0244085	0.0244085	0.00438067	0.00780366	2.12901
Sava	440	0.0112	0	0.027198	0.027198	0.0109937	0.00704971	10.1142
Tisza(HU)/Tisa(RS/YU)	441	0.017638	0	0.0322508	0.0322508	0.0156931	0.00745979	29.8796
Inn	442	0	0	0.00944109	0.00944109	0.000378907	0.00185303	0.113293
Danube/Donau(DL)/Duna(HU)/Dunav(YG/BU)/Dunarea(RO)	443	0.015249	0	0.050287	0.050287	0.0132214	0.0109315	79.7513
Baltic Sea Coast (West)	444	0	0	0.0288611	0.0288611	0.0034987	0.00779452	2.77797
Elbe(DL)/Labe(CZ)	445	0	0	0.0359536	0.0359536	0.00346276	0.00724013	8.44566
Rhone	446	0.010775	0	0.0323832	0.0323832	0.00876296	0.00797151	10.1387
North Sea Coast	447	0	0	0.0192901	0.0192901	0.00247274	0.00460385	2.30954
Weser	448	0	0	0.0192901	0.0192901	0.00254288	0.00509983	1.97328
Mosel(DL)/Moselle(FR)	449	0.009441	0	0.0112007	0.0112007	0.00549531	0.00533731	2.76964
Rhine/Rhein(DL) (except Mosel)	450	0	0	0.0233003	0.0233003	0.00276302	0.00540325	5.55919
Denmark	451	0	0	0.0134698	0.0134698	0.00397537	0.00536687	3.06103
Sweden	452	0	0	0.0127203	0.0127203	0.00138908	0.00360411	11.5905
Norway	453	0	0	0	0	0	0	0
Common to Norway-Finland-USSR	454	0	0	0	0	0	0	0
Common to Norway-Sweden	455	0	0	0.0107759	0.0107759	0.00167232	0.00367014	1.84792
France (Mediterranean Sea Coast)	456	0.010775	0	0.0351783	0.0351783	0.0112438	0.0111587	2.57483
Spain (South-East Coast)	457	0.024081	0	0.0801025	0.0801025	0.025103	0.0116933	36.8763
Ebro	458	0.019014	0	0.0627197	0.0627197	0.0200807	0.0111014	24.5185
Garonne	459	0.010779	0	0.0237266	0.0237266	0.00803162	0.00632802	6.56184
Dordogne	460	0.009441	0	0.0192901	0.0192901	0.00524758	0.00523694	1.91537
Loire	461	0.009441	0	0.0229368	0.0229368	0.00632577	0.00594009	12.2657
Seine	462	0	0	0.0124627	0.0124627	0.00465193	0.00530479	5.06595
Meuse(FR)/Maas(NL)	463	0	0	0.0134698	0.0134698	0.00345892	0.00506471	1.64645
Escaut(FR)/Schelde(BX)	464	0	0	0.00976562	0.00976562	5.02089e-05	0.000698427	0.0195312
France (Atlantic Ocean Coast)	465	0.009441	0	0.0192901	0.0192901	0.00739917	0.00500261	5.00184
English Channel Coast	466	0	0	0.0192901	0.0192901	0.0044563	0.00503736	5.00442
Guadalquivir	467	0.02471	0	0.0713765	0.0713765	0.0231945	0.0100749	19.1123
Guadiana	468	0.02667	0	0.061844	0.061844	0.0240262	0.012731	21.3352
Spain/Portugal (South Coast)	469	0	0	0.0761713	0.0761713	0.0166772	0.0210602	6.05381
Portugal (West Coast)	470	0	0	0.0214781	0.0214781	0.00677543	0.0073665	0.765624
Tajo(SP)/Tejo(PO)	471	0.023378	0	0.12306	0.12306	0.0217991	0.0174876	18.5293
Duero(SP)/Douro(PO)	472	0.017636	0	0.0831641	0.0831641	0.0155319	0.0158471	15.2834
Mino(SP)/Minho(PO), Limia(SP)/Lima(PO)	473	0.010738	0.0107388	0.0107388	0	0.0107388	0	0.0107388
Spain (North and West Coast)	474	0.010738	0.0107388	0.0192901	0.00855129	0.0115837	0.00255	1.76072
Central England	475	0	0	0.0284091	0.0284091	0.00247036	0.00800487	0.397727
Wales (except Severn)	476	0	0	0.0192901	0.0192901	9.71795e-05	0.00136571	0.0385802
South England	477	0	0	0.0192901	0.0192901	0.00257035	0.00561193	1.49851
East England	478	0	0	0.0289351	0.0289351	0.0052843	0.0097573	2.34095
North England	479	0	0	0.0284091	0.0284091	0.00290062	0.00729302	2.65697
Scotland	480	0	0	0.0107759	0.0107759	0.000641326	0.00254942	0.872845
Ireland (except Shannon)	481	0	0	0.0107759	0.0107759	0.000298855	0.00176949	0.377155
Shannon	482	0	0	0	0	0	0	0
Iceland	483	0	0	0	0	0	0	0
Kura	484	0.034326	0.0101288	0.0767127	0.0665839	0.0367615	0.011319	41.8346
Euphrates-Tigris	485	0.038434	0.0237648	0.0426039	0.0188391	0.0367065	0.00477493	4.25795
Greenland	486	0.01362	0.0124502	2.95388	2.94143	0.362836	0.802466	5064.83

## Sheet: #6.Damage CFs subcountry - FI
		Units are %crop diversity loss*m3 soil/g salt in soil (CDL per g salt in 1 m3 soil)
SUB-COUNTRY REGION	ID	MEDIAN	MIN	MAX	RANGE	MEAN	STD	SUM
Medjerda	1	0.007827	0.00115368	0.0161134	0.0149597	0.00771708	0.00266376	2.56207
Chott Melhir, Chott Rharsa	2	0.02028	0	0.30151	0.30151	0.0504919	0.0745077	64.781
Chott Djerid	3	0.298319	0	2.65732	2.65732	0.39395	0.32269	2869.14
Mediterranean Sea Coast (Western Part)	4	0.010751	0	0.0399031	0.0399031	0.0110732	0.00630415	26.2436
Chott el Hodna	5	0.009069	0	0.0166357	0.0166357	0.00778843	0.00373721	2.41441
Chott ech Chergui	6	0.012821	0	0.0184811	0.0184811	0.0121168	0.00435769	7.06409
Tafna	7	0.011078	0.00631322	0.0163323	0.0100191	0.0108986	0.00254973	0.893682
Moulouya	8	0.012524	0	0.0186295	0.0186295	0.0127959	0.00257093	8.61162
North-West Coast	9	0.109583	0	0.788024	0.788024	0.11832	0.102451	549.003
Oued Guir, Oued Daoura, Oued Dra	10	0.081222	0	1.71709	1.71709	0.31038	0.442194	805.125
Atui	11	0.150318	0	0.508847	0.508847	0.187003	0.118023	46.1898
Senegal	12	0.010305	0	0.327916	0.327916	0.0408697	0.0628532	137.935
Gambia	13	0.004272	0	0.015017	0.015017	0.00518991	0.00490124	2.69875
Geba(GW)/Kayanga(SG)	14	0	0	0.00643684	0.00643684	0.000860789	0.0021116	0.0964084
Corubal(GW)/Koliba(GN)	15	0	0	0	0	0	0	0
South-West Coast	16	0	0	0.0642532	0.0642532	0.00368344	0.0107307	6.39445
Kolenta(GN)/Great Scarcies(SL)	17	0	0	0	0	0	0	0
Little Scarcies	18	0	0	0	0	0	0	0
Moa	19	0	0	0	0	0	0	0
Mano	20	0	0	0	0	0	0	0
Lofa	21	0	0	0	0	0	0	0
Saint Paul	22	0	0	0	0	0	0	0
Saint John	23	0	0	0	0	0	0	0
Cestos	24	0	0	0	0	0	0	0
Cavally	25	0	0	0	0	0	0	0
Gulf of Guinea	26	0	0	0.00670017	0.00670017	0.000111497	0.000707176	0.511661
Sassandra	27	0	0	0.00535432	0.00535432	2.07496e-05	0.000331996	0.0159979
Komoe	28	0	0	0.0123493	0.0123493	0.00052625	0.00179786	0.461522
Bia	29	0	0	0	0	0	0	0
Tano	30	0	0	0	0	0	0	0
Volta	31	0	0	0.0403356	0.0403356	0.00246769	0.00455621	10.4137
Mono	32	0	0	0.00441918	0.00441918	0.000466778	0.00115046	0.102691
Oueme	33	0	0	0.00355057	0.00355057	0.000204277	0.000681375	0.126243
Niger (except Benue)	34	0	0	0.39986	0.39986	0.0206306	0.0439741	340.404
Benue	35	0	0	0.0232262	0.0232262	0.00168478	0.00315875	4.6062
Cross	36	0	0	0	0	0	0	0
Lake Chad	37	0.051444	0	2.84542	2.84542	0.235662	0.35642	5277.18
Sanaga	38	0	0	0.00348151	0.00348151	2.06278e-05	0.000267189	0.0313336
Nyong	39	0	0	0.00276007	0.00276007	2.03946e-05	0.000236378	0.00828021
Ntem	40	0	0	0.00276007	0.00276007	1.41906e-05	0.000197397	0.00552014
Benito	41	0	0	0	0	0	0	0
Utamboni, M'Bei	42	0	0	0	0	0	0	0
Ogooue	43	0	0	0	0	0	0	0
Nyanga	44	0	0	0	0	0	0	0
Kouilou	45	0	0	0	0	0	0	0
Chiloango	46	0	0	0	0	0	0	0
Zaire(ZR)/Congo(CG)	47	0	0	0.00712565	0.00712565	4.89577e-05	0.000490955	0.79287
Sangha	48	0	0	0	0	0	0	0
Oubangui	49	0	0	0	0	0	0	0
Kwa	50	0	0	0.00524655	0.00524655	0.000341584	0.00120222	3.56853
Ruki	51	0	0	0	0	0	0	0
Lomami	52	0	0	0	0	0	0	0
Lake Tanganyika	53	0	0	0.00473569	0.00473569	0.000348067	0.00107349	0.850328
Angola Coast	54	0	0	0.180834	0.180834	0.00250408	0.00867479	11.326
Cunene	55	0	0	0.0535839	0.0535839	0.00191796	0.0052214	1.95823
Etosha	56	0.009721	0	0.0423443	0.0423443	0.0136283	0.0109227	19.2841
Okavango(NM)/Cubango(AN)	57	0.021805	0	0.0466199	0.0466199	0.0193279	0.0158355	167.051
Namibia Coast	58	0.030658	0	3.2	3.2	0.071258	0.209802	200.449
Orange (Oranje)	59	0.030879	0	0.113618	0.113618	0.0331856	0.0214053	396.169
Cape Coast	60	0.006562	0	0.0611105	0.0611105	0.00936536	0.00980038	45.3471
Mediterranean Sea Coast (Eastern Part)	61	1.36696	0	3.2	3.2	1.54573	1.25216	32631.9
Nile	62	0.646188	0	3.2	3.2	1.105	1.07751	10078.7
Blue Nile/Bahr al-Azraq(SU)/Abbay(ET)	63	0.00535	0	0.0599848	0.0599848	0.00665573	0.00727154	25.9906
Atbara	64	0.010786	0	0.28015	0.28015	0.0337295	0.0566045	61.0842
Sobat	65	0.004203	0	0.00740685	0.00740685	0.00325961	0.00214351	9.14647
Bahr el Ghazel	66	0	0	0	0	0	0	0
Lake Mobutu-Sese Seko (Lake Albert)	67	0	0	0.00464785	0.00464785	0.000663391	0.0013552	0.45973
Lake Victoria	68	0	0	0.00572159	0.00572159	0.00138681	0.00210258	2.07882
Kagera	69	0	0	0.0039244	0.0039244	0.000131831	0.000619553	0.0804172
Mara	70	0.003277	0	0.00428004	0.00428004	0.00279655	0.00138431	0.427872
Victoria Nile	71	0	0	0.00327843	0.00327843	1.29072e-05	0.000205302	0.00983529
White Nile, Bahr el Jebel	72	0.005265	0	0.122951	0.122951	0.0158607	0.0239426	169.329
Gash	73	0.026776	0	0.205686	0.205686	0.0305872	0.0283475	17.8629
Baraka	74	0.048023	0	0.119591	0.119591	0.0494935	0.0284492	39.9907
Read Sea Coast, Gulf of Aden	75	0.045759	0	3.12	3.12	0.188198	0.344604	511.146
Awash	76	0.007191	0	0.0240448	0.0240448	0.00767483	0.00511082	7.49831
Wabi Shebelli	77	0.011097	0	0.0594817	0.0594817	0.0148483	0.0119689	101.8
Ogaden	78	0.029784	0.00504321	0.135135	0.130092	0.0350941	0.0183661	61.2744
Juba	79	0.011294	0	0.0694133	0.0694133	0.0150892	0.0122881	36.9383
Lake Turkana (Lake Rudolf)	80	0.012135	0	0.0373269	0.0373269	0.0122957	0.00924266	6.61507
Omo	81	0	0	0.0245181	0.0245181	0.00288456	0.00411087	2.80668
Chewabahir (Lake Stephanie)	82	0.004741	0	0.0266655	0.0266655	0.00528408	0.00552365	3.12818
Lake Natron	83	0.005242	0	0.010506	0.010506	0.00484356	0.00284069	0.99293
Umba	84	0	0	0.00243652	0.00243652	0.000100065	0.000474974	0.00470306
Great Ruaha	85	0	0	0.00992768	0.00992768	0.00178986	0.00249896	4.30641
Great Rift Valley	86	0	0	0.0148797	0.0148797	0.00270544	0.00342786	3.39804
Ruvuma	87	0	0	0.00525973	0.00525973	0.000188897	0.000821455	0.336615
Lake Rukwa	88	0	0	0.00603076	0.00603076	0.000865277	0.00195924	0.649823
Zambezi (except Shire)	89	0	0	0.0256281	0.0256281	0.00258926	0.00430982	34.3853
Shire	90	0	0	0.00676821	0.00676821	0.00133254	0.0020595	1.66435
Pungue, Buzi	91	0	0	0.014094	0.014094	0.000734267	0.00172405	0.491225
Save(MZ)/Sabi(ZW)	92	0	0	0.0320864	0.0320864	0.00473796	0.00876672	6.26832
Limpopo	93	0.010395	0	0.0456222	0.0456222	0.0161831	0.0117909	81.676
Incomati	94	0.005585	0	0.0191069	0.0191069	0.00488542	0.00376305	2.92148
Umbeluzi	95	0.006415	0	0.0209242	0.0209242	0.00979152	0.00657347	1.0379
Maputo	96	0.004375	0	0.0212074	0.0212074	0.00352326	0.00325873	1.34236
East Coast, South West Indian Ocean	97	0	0	0.207121	0.207121	0.00996744	0.0221228	147.757
Nadym, Pur, Taz, Chatanga, Anabar, Olenok	98	0.00315	0	0.00550397	0.00550397	0.00257007	0.00167443	129.331
Jana, Indigirka, Kolyma	99	0.004832	0	0.00754985	0.00754985	0.00451088	0.00169356	87.3351
Lake Chany, Lake Kulundinskoe	100	0.005828	0	0.0124621	0.0124621	0.00545709	0.0023208	11.2525
Arabian Sea	101	0.050363	0	0.17654	0.17654	0.055616	0.0332701	39.7654
Korea (Southern Part)	102	0	0	0.00263799	0.00263799	0.000879329	0.00124356	0.43263
Mongolia (Internal Basins)	103	0.024765	0	0.277782	0.277782	0.0382385	0.0417468	958.679
Shikoku	104	0.002637	0	0.00318168	0.00318168	0.00158401	0.00134167	0.251857
Kyushu	105	0	0	0.00318168	0.00318168	0.000643681	0.00116686	0.200185
Honshu (Japan Sea Coast)	106	0	0	0.00318168	0.00318168	0.000919985	0.00136322	0.65871
Honshu (Pacific Coast)	107	0	0	0.00318168	0.00318168	0.000791345	0.00125647	0.963066
Hokkaido	108	0	0	0.00318168	0.00318168	0.000678383	0.00124387	0.3609
Xi	109	0	0	0.00312703	0.00312703	6.135e-05	0.000349931	0.256566
Han	110	0	0	0.00435644	0.00435644	0.000929493	0.00146504	0.670164
Yangtze/Chang(CI),Siang	111	0	0	0.0049907	0.0049907	0.000907246	0.001354	14.7654
Yellow River/Hwang(CI)	112	0.005235	0	0.0640152	0.0640152	0.00905753	0.00962625	78.1303
Liao	113	0.00549	0	0.00673655	0.00673655	0.00496305	0.00142726	9.80698
Han	114	0	0	0	0	0	0	0
Tumen	115	0.003986	0	0.00415231	0.00415231	0.00369463	0.000872244	0.395325
Red River/Hongha(VN)	116	0	0	0.00409148	0.00409148	0.000439444	0.00109192	0.820881
Ma	117	0	0	0.00325413	0.00325413	8.51867e-06	0.000166278	0.00325413
Ca	118	0	0	0	0	0	0	0
Vietnam (Middle Part)	119	0	0	0.00409148	0.00409148	0.000177727	0.000826739	0.0801549
Vietnam (Southern Part)	120	0	0	0.004279	0.004279	0.000246695	0.000784812	0.245955
Mekong	121	0	0	0.00361516	0.00361516	0.000175054	0.000645427	1.48708
Gulf of Thailand,Pakchan	122	0	0	0.00538381	0.00538381	0.000209906	0.000832094	0.331442
Chao Phraya	123	0	0	0.00457618	0.00457618	0.000379319	0.00112599	0.851191
Tenannerim Coast	124	0	0	0.00325413	0.00325413	9.87597e-06	0.000178998	0.00650826
Salween	125	0	0	0.00355923	0.00355923	0.000220641	0.000740264	0.40951
Sittang	126	0	0	0.00396158	0.00396158	9.90416e-05	0.000577424	0.0413003
Irrawaddy	127	0	0	0.00538966	0.00538966	0.00038415	0.00116486	1.8685
Kaladan, Arakan Coast	128	0	0	0.00221995	0.00221995	2.65181e-05	0.000241175	0.0310792
Karnaphuli	129	0	0	0	0	0	0	0
Sri Lanka	130	0.003254	0	0.0112883	0.0112883	0.00246843	0.00210646	1.83651
Godavari	131	0.003589	0	0.0121923	0.0121923	0.00355861	0.00211521	12.3092
Mahanadi	132	0	0	0.00440569	0.00440569	0.000733311	0.00148629	1.15276
India (East Coast)	133	0.004667	0	0.0138556	0.0138556	0.00412079	0.00340486	32.1257
India (West Coast)	134	0.004529	0	0.103527	0.103527	0.0129115	0.0225585	88.8957
Meghna	135	0	0	0.00221995	0.00221995	2.31969e-06	7.17231e-05	0.00221995
Kosi	136	0	0	0.00318168	0.00318168	0.00134588	0.00141251	0.713314
Gandak	137	0	0	0.00318168	0.00318168	0.00126391	0.00142827	0.692625
Ghaghra	138	0.002746	0	0.00402738	0.00402738	0.00190136	0.00159056	2.87295
Yamuna	139	0.004814	0	0.033684	0.033684	0.00490779	0.00413778	19.8913
Ganges/Ganga(IN)	140	0	0	0.0051113	0.0051113	0.00159139	0.00174941	7.64343
Ulungur	141	0.03257	0	0.0658766	0.0658766	0.0312796	0.0106882	31.1858
Char Us Nuur	142	0.012715	0	0.0384074	0.0384074	0.0143826	0.00684747	26.7516
Uvs Nuur	143	0.005011	0	0.0156474	0.0156474	0.00558123	0.00261987	4.93381
Khuram	144	0.015396	0.0129152	0.0168789	0.0039637	0.0152181	0.00103967	0.745685
Gomal	145	0.032736	0.0198314	0.0359837	0.0161523	0.031744	0.00374265	2.28557
Kabul	146	0.006182	0.00276122	0.0123974	0.0096362	0.00660252	0.00233006	1.95435
Sutlej	147	0.021739	0	0.176659	0.176659	0.0313567	0.0330991	83.6911
Ravi	148	0.006536	0	0.0515134	0.0515134	0.0148979	0.015736	6.4806
Chenab	149	0.005983	0	0.0863453	0.0863453	0.0150322	0.0170835	10.5226
Jhelum	150	0.004604	0	0.0531337	0.0531337	0.0089631	0.00971737	4.05132
Indus	151	0.072624	0	0.205462	0.205462	0.071568	0.0499149	302.447
Pishin Lora	152	0.112617	0	0.224159	0.224159	0.106411	0.0407696	49.3745
Dasht	153	0.017082	0.0128774	0.0227139	0.00983652	0.0172545	0.00263936	0.810961
Helmand	154	0.101729	0	0.407612	0.407612	0.110787	0.0887321	112.227
Daryachech, Sistan	155	0.065428	0	0.4897	0.4897	0.086512	0.0995013	106.064
Iran (Central Basin)	156	0.030773	0	0.527542	0.527542	0.061674	0.0856897	482.907
Iran (Persian Gulf Coast)	157	0.02627	0	0.0794349	0.0794349	0.0261722	0.0171284	51.8733
Karun	158	0.019506	0	0.0762786	0.0762786	0.0195528	0.0156928	19.5332
Lake Rezayeh	159	0.010536	0	0.0173987	0.0173987	0.00963769	0.00495035	3.71051
Caspian Sea (South Coast)	160	0.011502	0	0.0818946	0.0818946	0.0132247	0.0117845	16.9144
Tarim	161	0.118229	0	0.410319	0.410319	0.120682	0.064789	956.891
Ural, Emba	162	0.013218	0	0.0384733	0.0384733	0.0143982	0.00673787	106.1
Atrek, Harirud(AH)/Tedzen(RS), Murgab	163	0.029147	0	0.0995336	0.0995336	0.031405	0.0208371	212.266
Amu Darya	164	0.025806	0	0.0880256	0.0880256	0.0284928	0.019719	90.0658
Syr Darya	165	0.018344	0	0.0760068	0.0760068	0.0254252	0.0212482	92.1408
Chu, Talas, Asse, Lake Issykkul	166	0.019724	0	0.0573183	0.0573183	0.0249632	0.0176285	55.6179
Lake Balkhash, Lake Alakol	167	0.013114	0	0.0681879	0.0681879	0.0156672	0.0117115	97.5283
Central Kazakhstan	168	0.015596	0	0.0855573	0.0855573	0.0210439	0.0187199	355.936
Ob (Lower part), Tobol	169	0	0	0.0167754	0.0167754	0.00200642	0.00279295	28.6597
Irtish	170	0.005634	0	0.0366193	0.0366193	0.00543977	0.00433208	97.4208
Ob (Upper and middle part)	171	0	0	0.0111673	0.0111673	0.000792908	0.00157816	15.4601
Yenisey	172	0.003523	0	0.00543787	0.00543787	0.00230272	0.00194829	45.9854
Angara	173	0	0	0.00507371	0.00507371	0.000767422	0.00160459	4.65595
Lake Baikal	174	0.004663	0	0.00864584	0.00864584	0.00457157	0.00189124	8.27454
Japan Sea Coast	175	0.002541	0	0.00389015	0.00389015	0.00210298	0.00119101	0.588835
Sakhalin, Kuril Islands	176	0	0	0.00223912	0.00223912	0.000122305	0.00050882	0.0873259
Lena	177	0.005243	0	0.00774171	0.00774171	0.00520146	0.00113411	169.037
Kamchatka	178	0	0	0	0	0	0	0
Okhotsk Sea, Bering Sea	179	0.002212	0	0.00467566	0.00467566	0.0016648	0.00158325	13.7945
Bo Hai Coast	180	0.004748	0	0.00668469	0.00668469	0.00469862	0.00114752	15.6793
Korea (Northern Part)	181	0.002637	0	0.0039116	0.0039116	0.00221429	0.00106971	0.994215
Yalu(CI)/Amnok(KR)	182	0.002864	0.00231205	0.00286468	0.000552626	0.00271316	0.000212161	0.203487
South-East Coast	183	0	0	0.00409148	0.00409148	0.000162623	0.000564897	0.753434
Arabian Peninsula	184	0.150686	0	0.820609	0.820609	0.19531	0.155105	5513.99
Amur(RS)/Heilong(CI)	185	0.003267	0	0.0106489	0.0106489	0.00333635	0.00230422	62.8468
Brahmaputra(IN)/Jamuna(BW)	186	0	0	0.00318168	0.00318168	0.00028744	0.000819122	0.844785
Euphrates-Tigris (see also VI.)	187	0.01766	0	0.180254	0.180254	0.0431379	0.0479389	361.971
Caleufu, Corcovado, Palena,Manso,Futaleu	188	0.002637	0	0.00476261	0.00476261	0.00222926	0.00128786	0.570691
Gallegos, Chico	189	0.002747	0	0.0132946	0.0132946	0.0046368	0.00368413	0.69552
Lago Fagnano	190	0	0	0	0	0	0	0
Chile (Southern Part)	191	0	0	0.018797	0.018797	0.00230306	0.0037725	6.65124
Chile (Northern Part)	192	0.040541	0	2.47999	2.47999	0.147554	0.268527	453.582
Puna Endorheic Basins,Salinas Grandes	193	0.009415	0	0.0590866	0.0590866	0.0122013	0.0100038	50.0862
Laguna Merin	194	0.002747	0	0.00279997	0.00279997	0.00246881	0.000617689	0.725831
Uruguay	195	0.002044	0	0.00365971	0.00365971	0.00149725	0.00128372	5.76443
Paraguay (Lower Part)	196	0.004546	0	0.0382557	0.0382557	0.00531722	0.00491341	32.7594
Paraguay (Middle Part)	197	0.003148	0	0.0143558	0.0143558	0.00386729	0.00351917	17.8514
Paraguay (Upper Part)	198	0	0	0.00343276	0.00343276	0.0013807	0.00140568	3.95847
Parana (between Paraguay and Uruguay)	199	0.003605	0	0.02476	0.02476	0.00406524	0.00261227	25.3305
Parana (between Iguazu and Paraguay)	200	0	0	0.00326178	0.00326178	0.000783121	0.00123994	1.24046
Parana (between Paranapanema and Iguazu)	201	0	0	0	0	0	0	0
Parana (between Tiete and Paranapanema)	202	0	0	0	0	0	0	0
Parana (between Grande and Tiete)	203	0	0	0	0	0	0	0
Grande	204	0	0	0	0	0	0	0
Paranaiba	205	0	0	0	0	0	0	0
Rio de la Plata	206	0.002286	0	0.00558097	0.00558097	0.00252804	0.000612076	5.45298
Laguna Blanca,Cancosa,Todos los Santos,Lauca, Cosa Pilla	207	0.017101	0	0.138613	0.138613	0.0296718	0.0345506	27.8618
Lago Titicaca, Lago de Poopo	208	0.008903	0	0.0545235	0.0545235	0.00940509	0.0107124	6.00985
Brazil (South East)	209	0	0	0.0108696	0.0108696	0.000891754	0.00216805	2.55577
Brazil (East)	210	0	0	0.0129174	0.0129174	0.00122919	0.00273456	7.98848
Sao Francisco	211	0	0	0.0153257	0.0153257	0.00138809	0.00353823	9.23638
Brazil (North and North East)	212	0	0	0.0149308	0.0149308	0.00125555	0.00310475	16.8582
Tocantins	213	0	0	0.00316896	0.00316896	1.09365e-05	0.000185844	0.0918997
Tumbes	214	0.007551	0.00445726	0.0112752	0.00681797	0.00778914	0.00186628	0.241463
Chira	215	0.007718	0.00324097	0.798467	0.795226	0.0557853	0.138456	5.6901
Peru (Pacific Ocean)	216	0.077792	0	3.2	3.2	0.347119	0.632304	349.896
Ecuador (Pacific Ocean)	217	0	0	0.0187434	0.0187434	0.00174322	0.00247352	1.71359
Mira	218	0	0	0.00286063	0.00286063	0.000283113	0.000755784	0.0339736
Patia	219	0	0	0.00242103	0.00242103	0.000510792	0.00098673	0.0990937
Colombia (Pacific Ocean)	220	0	0	0.00318168	0.00318168	0.00031679	0.000952664	0.146357
Amazon (d/s Xingu confluence - mouth)	221	0	0	0	0	0	0	0
Amazon (d/s Tapajos confluence - d/s Xingu confluence)	222	0	0	0	0	0	0	0
Amazon (d/s Trombetas confluence - d/s Tapajos confluence)	223	0	0	0	0	0	0	0
Amazon (d/s Madeira confluence - d/s Trombetas confluence)	224	0	0	0	0	0	0	0
Amazon (d/s Negro confluence - d/s Madeira confluence)	225	0	0	0	0	0	0	0
Amazon (d/s Purus confluence - d/s Negro confluence)	226	0	0	0	0	0	0	0
Amazon (u/s Lago Coari - d/s Purus confluence)	227	0	0	0	0	0	0	0
Amazon (d/s Jutai confluence - u/s Lago Coari	228	0	0	0	0	0	0	0
Amazon (d/s Javari confluence - d/s Jutai confluence)	229	0	0	0	0	0	0	0
Amazon (headwaters - d/s Javari confluence)	230	0	0	0.00587645	0.00587645	0.000299963	0.00102397	2.16993
Caqueta(CO)/Japura(BZ)	231	0	0	0	0	0	0	0
Putumayo(CO)/Ica(BZ)	232	0	0	0	0	0	0	0
Napo	233	0	0	0	0	0	0	0
Negro	234	0	0	0	0	0	0	0
Mamore	235	0	0	0.0118418	0.0118418	0.0012707	0.00274309	8.52768
Beni	236	0	0	0.0107329	0.0107329	0.000111801	0.000957311	0.243615
Oyapock(FG)/Oiapoque(BZ)	237	0	0	0.00318168	0.00318168	2.0461e-05	0.000254326	0.00636336
French Guiana (Atlantic Ocean)	238	0	0	0.00318168	0.00318168	0.000143073	0.000659351	0.0668152
Maroni(FG)/Marowijne(SM)	239	0	0	0.00409148	0.00409148	9.47026e-06	0.000186785	0.00727316
Suriname (Atlantic Ocean)	240	0	0	0.00409148	0.00409148	0.000265634	0.000930851	0.205069
Courantijn(SM)/Corentyne(GY)	241	0	0	0.00318168	0.00318168	5.05697e-05	0.000397919	0.0381801
Guyana (Atlantic Ocean)	242	0	0	0.00318168	0.00318168	0.000618383	0.00125901	0.197264
Essequibo, Amacuro, Barima	243	0	0	0.00318168	0.00318168	1.51508e-05	0.000219033	0.0254534
Orinoco	244	0	0	0.00508143	0.00508143	0.000136279	0.000603298	1.43802
Venezuela (Caribbean Sea Coast)	245	0	0	0.0197875	0.0197875	0.0030458	0.00384144	6.17079
Catatumbo	246	0	0	0.00336066	0.00336066	0.00123353	0.00138465	0.280011
Magdalena	247	0	0	0.00705605	0.00705605	0.00148392	0.00165727	3.15926
Colombia (Caribbean Sea Coast)	248	0	0	0.0139664	0.0139664	0.00162071	0.00293254	1.62557
Lago San Martin(AG)/Lago O'Higgins(CH)	249	0.002809	0.00263799	0.00434122	0.00170323	0.00304049	0.000472256	0.0912147
Lago Pueyrredon(AG)/Lago Cochrane(CH)	250	0.002941	0	0.0060917	0.0060917	0.00281939	0.00147057	0.174802
Patagonia (Internal Basins)	251	0.072885	0.00330871	0.150322	0.147014	0.0731558	0.0351837	34.0174
Lago Buenos Airea(AG)/Lago General Carrera(CH), Baker	252	0.007947	0	0.023838	0.023838	0.00713401	0.00731442	0.613525
Patagonia (Atlantic Ocean)	253	0.032233	0	0.157855	0.157855	0.0383329	0.0288947	199.178
Argentina (Atlantic Ocean)	254	0.012739	0	0.165373	0.165373	0.024468	0.0259583	306.388
Alaska (Arctic Ocean)	255	0.002958	0	0.00599231	0.00599231	0.00252306	0.0018055	22.3316
Alaska (Pacific Ocean)	256	0	0	0.0108696	0.0108696	0.000356371	0.00164868	3.03878
Yukon	257	0.002637	0	0.00839286	0.00839286	0.00242508	0.00256328	45.7832
Stikine	258	0.002637	0	0.00322456	0.00322456	0.00193491	0.00133491	0.853297
Canada (Pacific Ocean/South+North)	259	0	0	0.00500709	0.00500709	0.000322888	0.00112239	0.835311
Fraser	260	0.004153	0	0.0116021	0.0116021	0.00349615	0.00245507	13.128
Mackenzie	261	0.002637	0	0.00757983	0.00757983	0.00225867	0.00233008	81.0026
Canada (Arctic Ocean)	262	0.006205	0	0.0180778	0.0180778	0.00648278	0.00251216	317.818
Nelson	263	0.00448	0	0.0136855	0.0136855	0.00380224	0.00262265	72.292
Hudson Bay	264	0	0	0.00766499	0.00766499	0.00196903	0.00224704	92.0364
Columbia (except Snake)	265	0.002515	0	0.0331913	0.0331913	0.00404799	0.00546462	25.7654
Snake	266	0.007273	0	0.0451642	0.0451642	0.00837087	0.00673884	36.7397
USA (Internal Basins)	267	0.027243	0	0.35761	0.35761	0.0402802	0.0458214	351.928
Upper Mississippi	268	0.003071	0	0.00578022	0.00578022	0.0020471	0.00184241	14.5712
Upper Missouri	269	0.008481	0	0.0268848	0.0268848	0.00916573	0.00327277	64.5084
Middle Missouri	270	0.006128	0.0034904	0.0158046	0.0123142	0.00677502	0.00249173	45.352
Lower Missouri	271	0.005795	0	0.0221214	0.0221214	0.00681738	0.00438274	55.064
Ohio	272	0	0	0.00463661	0.00463661	0.000439261	0.00107319	3.32169
Arkansas	273	0.006913	0	0.0361118	0.0361118	0.00852461	0.00692784	51.8041
Red	274	0.002626	0	0.0104457	0.0104457	0.00314676	0.00337532	10.2018
Lower Mississippi	275	0	0	0.00364018	0.00364018	0.000496332	0.00107967	1.70639
St.John, St.Croix	276	0	0	0.00415365	0.00415365	0.000477334	0.0013247	0.473516
Lake Superior	277	0	0	0.00415365	0.00415365	0.000145638	0.000751402	0.304674
Lake Michigan	278	0	0	0.00481682	0.00481682	0.000215795	0.000929037	0.411737
Lake Huron	279	0	0	0.00458897	0.00458897	0.000700958	0.00147486	1.64795
Lake Erie	280	0	0	0.0044802	0.0044802	0.00140291	0.00175775	1.88972
Lake Ontario	281	0	0	0.00434179	0.00434179	0.00136653	0.00187761	1.23124
St.Lawrence	282	0	0	0.00415365	0.00415365	0.000411139	0.0010644	1.8493
Canada (Atlantic Ocean)	283	0	0	0.00415365	0.00415365	0.000126437	0.000713575	1.45378
USA (Pacific Ocean/North)	284	0	0	0.00443916	0.00443916	4.5787e-05	0.000403762	0.070741
USA (Pacific Ocean/South)	285	0.004855	0	0.024369	0.024369	0.00495609	0.00479621	17.1927
USA (Atlantic Ocean/North)	286	0	0	0.00372386	0.00372386	0.000217785	0.000808244	1.19325
USA (Atlantic Ocean/South)	287	0	0	0.00325413	0.00325413	2.05029e-05	0.000234492	0.105139
USA (Gulf of Mexico/East)	288	0	0	0.00257127	0.00257127	0.00011481	0.000510937	0.558666
USA (Gulf of Mexico/West)	289	0.005444	0	0.0295208	0.0295208	0.00560128	0.0039945	38.0159
Grande(US)/Bravo(MX)	290	0.014085	0.00379267	0.0985127	0.0947201	0.0201078	0.0138385	140.755
Colorado	291	0.019757	0.00348755	0.328686	0.325198	0.0328486	0.0362129	306.773
Concepcion, Yagui	292	0.008621	0	0.144869	0.144869	0.0187161	0.0189162	23.1143
Tijuana	293	0.013483	0.00965307	0.0166652	0.0070121	0.0132551	0.00154743	0.649502
Mexico (Pacific Ocean/North)	294	0.022003	0	0.351991	0.351991	0.0396918	0.0479312	174.366
Mexico (Pacific Ocean/South)	295	0.001889	0	0.013374	0.013374	0.00242508	0.00284917	11.2693
Mexico (Internal Basins)	296	0.018134	0	0.0649466	0.0649466	0.0223331	0.0135445	74.8158
Mexico (Gulf of Mexico/North)	297	0.00408	0	0.0195582	0.0195582	0.00394822	0.00290455	7.03968
Mexico (Gulf of Mexico/South)	298	0.003076	0	0.0103407	0.0103407	0.00255434	0.00199436	5.05504
Hondo	299	0.002124	0	0.00322962	0.00322962	0.00190449	0.000735187	0.158072
Candelaria	300	0.00232	0	0.00277519	0.00277519	0.00217273	0.000699228	0.295492
Usumacinta-Grijalva	301	0	0	0.00475987	0.00475987	0.00103687	0.00142184	1.3894
Coatan, Suchiate	302	0.001884	0	0.00325413	0.00325413	0.00127361	0.00101784	0.0241986
Lempa	303	0	0	0.00449857	0.00449857	0.000275289	0.000992443	0.0583614
Paz	304	0	0	0.00409148	0.00409148	0.000263967	0.00100515	0.00818296
Motagua	305	0.002571	0	0.00445062	0.00445062	0.00166284	0.00151624	0.317602
Honduras (Caribbean Sea),Goascoran	306	0	0	0.00510176	0.00510176	0.00030297	0.000913443	0.257827
Coco	307	0	0	0.0041738	0.0041738	0.000107395	0.000580939	0.0306076
Choluteca, Negro	308	0	0	0.00422305	0.00422305	0.00142637	0.0016609	0.229645
Nicaragua (Pacific Ocean)	309	0	0	0.00215257	0.00215257	0.000636378	0.000900702	0.0534558
Nicaragua (Caribbean Sea)	310	0	0	0.00421282	0.00421282	0.000192338	0.000649519	0.155794
San Juan	311	0	0	0.00446983	0.00446983	0.000873682	0.00133882	0.336368
Costa Rica (Pacific Ocean)	312	0	0	0.00409148	0.00409148	0.00123431	0.00147355	0.37523
Costa Rica (Caribbean Sea)	313	0	0	0.00409148	0.00409148	0.000397566	0.000950731	0.0405517
Sixaola	314	0	0	0	0	0	0	0
Panama (Pacific Ocean)	315	0	0	0.00387035	0.00387035	0.000393214	0.00098936	0.23986
Panama (Caribbean Sea)	316	0	0	0	0	0	0	0
Bahamas	317	0.003675	0	0.00500653	0.00500653	0.00343311	0.00122743	0.374209
Cuba (North)	318	0.002177	0	0.00618035	0.00618035	0.00161704	0.00157436	0.797203
Cuba (South)	319	0	0	0.00475775	0.00475775	0.00117245	0.00135869	0.862923
Dominican Republic	320	0.00264	0	0.0059137	0.0059137	0.00220664	0.00162575	1.20041
Haiti	321	0.002759	0	0.00628655	0.00628655	0.00205499	0.00168544	0.639103
Jamaica	322	0	0	0.00524502	0.00524502	0.00142855	0.00162758	0.147141
Puerto Rico	323	0.002637	0	0.00475882	0.00475882	0.00212508	0.00127245	0.184882
Trinidad and Tobago	324	0	0	0.00318168	0.00318168	0.000660348	0.00129033	0.0349985
Barbados	325	0	0	0	0	0	0	0
Guadeloupe, Martinique	326	0	0	0.00361768	0.00361768	0.00104495	0.00136218	0.0240339
El Salvador (Pacific Ocean)	327	0	0	0.00499148	0.00499148	0.00138323	0.00161493	0.182587
Nacaome	328	0.002226	0	0.00410375	0.00410375	0.00175201	0.00176053	0.0770886
Guatemala (Pacific Ocean)	329	0.001884	0	0.00459782	0.00459782	0.00141765	0.00159192	0.318971
Dulce	330	0.003254	0	0.00409148	0.00409148	0.00281791	0.00122179	0.0366328
Belize, Sarstun	331	0	0	0.00409148	0.00409148	0.0010277	0.00124599	0.241509
Changuinola	332	0	0	0	0	0	0	0
Australia (North-East Coast)	333	0.005234	0	0.0254595	0.0254595	0.00568005	0.0056094	29.8771
Australia (South-East Coast)	334	0.00349	0	0.0160733	0.0160733	0.00300989	0.00250955	10.7844
Tasmania	335	0.002413	0	0.00554478	0.00554478	0.00167493	0.0017157	1.58113
Murray	336	0.009417	0	0.0566284	0.0566284	0.0141051	0.0113852	200.673
South Australian Gulf	337	0.018262	0	0.0946371	0.0946371	0.0221557	0.0231847	321.568
Australia (South-West Coast)	338	0.010587	0	0.0537789	0.0537789	0.0120809	0.0122463	43.0563
Australia (Indian Ocean Coast)	339	0.023774	0	0.0991685	0.0991685	0.0273488	0.0256381	276.332
Australia (Timor Sea Coast)	340	0.006003	0	0.0563154	0.0563154	0.00890684	0.010489	33.7302
Australia (Gulf of Carpentaria)	341	0.004719	0	0.0409411	0.0409411	0.00707733	0.00849443	44.9127
Lake Eyre	342	0.021894	0	0.104659	0.104659	0.0219638	0.0198229	307.055
Bulloo-Bancannia	343	0.043333	0	0.0889932	0.0889932	0.0390476	0.0225676	61.9295
Australia (Western Plateau)	344	0	0	0.0912759	0.0912759	0.011995	0.0214826	153.453
Golok	345	0	0	0	0	0	0	0
Perak	346	0	0	0.00318168	0.00318168	0.000151059	0.000676611	0.0509068
Kelantan	347	0	0	0	0	0	0	0
Pahang	348	0	0	0	0	0	0	0
Trengganu	349	0	0	0.00409148	0.00409148	7.22026e-05	0.000538704	0.0122744
Langat, Klang, Selangor	350	0	0	0	0	0	0	0
Kerian	351	0	0	0.00318168	0.00318168	0.000181071	0.000737105	0.0222717
Semberong, Johor	352	0	0	0.00409148	0.00409148	0.000248094	0.000870324	0.0622715
Sarawak	353	0	0	0	0	0	0	0
Sabah	354	0	0	0.0026877	0.0026877	2.69781e-05	0.00026792	0.0215016
Singapore	355	0	0	0	0	0	0	0
Sembakung,Borneo (indon.Part)	356	0	0	0.00888099	0.00888099	0.000676611	0.00229602	4.13748
Sumatra	357	0	0	0.00888099	0.00888099	0.000202255	0.00116071	1.0048
Java	358	0	0	0.00431642	0.00431642	0.00122997	0.00139213	1.50671
Bali, Lombok	359	0.001884	0	0.00409148	0.00409148	0.00146491	0.00128803	0.147956
Sumbawa	360	0.001884	0	0.00396437	0.00396437	0.00158794	0.00153015	0.514494
Timor	361	0.00385	0	0.00566322	0.00566322	0.0027884	0.00182242	0.421049
Sulawesi	362	0	0	0.00380814	0.00380814	0.000519145	0.00115301	1.30928
Tami	363	0	0	0.00318168	0.00318168	0.00026514	0.000879369	0.00954503
Sepik	364	0	0	0.00318168	0.00318168	0.00089848	0.00143227	0.811328
Fly	365	0	0	0.00318168	0.00318168	0.000700963	0.00131867	0.448617
New Guinea (Irian Jaya)	366	0	0	0.00346764	0.00346764	0.00052419	0.00118662	2.18273
New Guinea (Eastern Part)	367	0	0	0.00345755	0.00345755	0.00072433	0.00131513	1.93107
Luzon	368	0	0	0.00888099	0.00888099	0.000280638	0.00111442	0.347991
Palawan	369	0	0	0	0	0	0	0
Mindoro	370	0	0	0	0	0	0	0
Panay	371	0	0	0.00188922	0.00188922	0.000354228	0.000737385	0.0453412
Negros	372	0	0	0.00188922	0.00188922	1.62165e-05	0.00017428	0.00377844
Samar	373	0	0	0	0	0	0	0
Mindanao	374	0	0	0.00888099	0.00888099	0.000130829	0.00104674	0.140772
New Caledonia	375	0	0	0.00305433	0.00305433	0.00126857	0.00136336	0.267667
New Zealand (North Island I)	376	0	0	0.00409148	0.00409148	0.000320756	0.000994574	0.20368
New Zealand (North Island II)	377	0	0	0.00263799	0.00263799	0.000101951	0.00050848	0.0211039
New Zealand (North Island III)	378	0	0	0.0108696	0.0108696	0.00040729	0.00153412	0.30506
New Zealand (South Island I)	379	0	0	0.00502689	0.00502689	0.000425402	0.00125148	0.099544
New Zealand (South Island II)	380	0	0	0.00484554	0.00484554	0.000545013	0.00122292	0.271961
New Zealand (South Island III)	381	0	0	0.0048234	0.0048234	0.000596716	0.00133732	0.328194
New Zealand (South Island IV)	382	0	0	0	0	0	0	0
New Zealand (South Island V)	383	0	0	0.00342904	0.00342904	0.000122105	0.000570264	0.052505
Hawaii	384	0	0	0.00445619	0.00445619	0.000933412	0.00136925	0.0410701
Fiji	385	0.002759	0	0.00275965	0.00275965	0.00248855	0.000760957	0.467847
Solomon Islands	386	0.002759	0	0.00367075	0.00367075	0.00226762	0.0011637	0.818609
Vanuatu	387	0.001802	0	0.00409148	0.00409148	0.00162557	0.00171255	0.185315
Cyprus	395	0.007493	0.00522645	0.0112493	0.00602286	0.00769113	0.00160724	0.615291
Internal Basins, Gulf of Aqaba	396	0.067791	0	0.537835	0.537835	0.0996285	0.104915	169.568
East Mediterranean Coast	397	0.007294	0	0.130277	0.130277	0.019081	0.0271579	6.65926
Asi	398	0.00959	0.002995	0.0168927	0.0138977	0.00967538	0.00350862	2.81553
Turkey (Mediterranean Sea Coast)	399	0.008464	0	0.0149498	0.0149498	0.00784944	0.00311947	8.56374
Turkey (Black Sea Coast)	400	0.007572	0	0.0141585	0.0141585	0.00695048	0.00273157	11.51
Western Transcaucasus	401	0.004806	0	0.0048062	0.0048062	0.00279069	0.00237163	0.0865115
Northern Caucasus	402	0.010076	0	0.0216321	0.0216321	0.0101104	0.0048134	24.3863
Sea of Azov	403	0.005256	0	0.00961274	0.00961274	0.00558864	0.00212711	10.9593
Black Sea Coast (West of Dniepr)	405	0.003539	0	0.00922364	0.00922364	0.0037463	0.00294591	4.94511
Lower Dniepr	406	0.00303	0	0.0096214	0.0096214	0.00414069	0.00280272	7.61058
Upper Dniepr, Bug	407	0.00247	0	0.00590241	0.00590241	0.00258127	0.00257486	15.6167
Don	408	0.007098	0	0.014673	0.014673	0.0064527	0.00332825	34.1025
Lower Volga	409	0.008251	0	0.0293812	0.0293812	0.010144	0.00577067	29.1234
Kama	410	0	0	0.00856967	0.00856967	0.000834375	0.00173894	6.7309
Upper Volga	411	0	0	0.00646696	0.00646696	0.000684405	0.00145724	9.85749
Neman	412	0	0	0.00523919	0.00523919	0.000901337	0.00170028	1.76121
Western Dvina, Rivers between Western Dvina and Neman	413	0	0	0.00490349	0.00490349	0.000365346	0.00108045	0.959765
Karelia, North-West Russia, Estonia	414	0	0	0	0	0	0	0
Kola Peninsula	415	0	0	0	0	0	0	0
Russia (Northern District)	416	0	0	0.0048062	0.0048062	0.000556435	0.0013597	13.9682
Rivers between Volga and Ural	417	0.014817	0	0.0314573	0.0314573	0.0138173	0.00510403	15.4753
Turkey (Aegean Sea Coast)	418	0	0	0.0103345	0.0103345	0.00277407	0.00382831	1.46471
Black Sea Coast (West)	419	0.005234	0	0.0107698	0.0107698	0.00547028	0.00246997	2.117
Marica(BU)/Meric(TU)/Evros(GR)	420	0.00662	0	0.00899371	0.00899371	0.00562544	0.00221541	4.53973
Mesta(BU)/Nestos(GR), Struma(BU)/Strimon	421	0.007373	0.00490349	0.00964807	0.00474458	0.00754881	0.00116004	1.72868
Vardar(YG)/Axios(GR)	422	0.008685	0.00188922	0.00992887	0.00803965	0.00749557	0.00272701	0.734566
Greece (South)	423	0.007429	0.00563136	0.0132584	0.00762706	0.00782711	0.00159211	2.40292
Greece (North)	424	0.006897	0	0.00993654	0.00993654	0.00654245	0.0023292	2.98336
Albania/Greece (Adriatic Coast)	425	0.004903	0	0.00562302	0.00562302	0.00454807	0.0007607	1.69188
Yugoslavia (Adriatic Coast)	426	0.002759	0.00275965	0.0046875	0.00192785	0.00329928	0.000759933	0.336527
Wisla	427	0	0	0.00982965	0.00982965	0.00137488	0.00236835	4.49998
Odra(PL)/Oder(DL)	428	0	0	0.0117739	0.0117739	0.0014736	0.00283273	3.01203
Baltic Sea Coast (East)	429	0	0	0.00888099	0.00888099	0.00163788	0.00258579	0.633858
Finland (Gulf of Finland)	430	0	0	0	0	0	0	0
Finland (Gulf of Bothnia)	431	0	0	0	0	0	0	0
Sicily	432	0.00879	0	0.0125766	0.0125766	0.0077933	0.00307259	2.7978
Italy (Adriatic Sea/Ionian Sea)	433	0.003742	0	0.010185	0.010185	0.00381293	0.00267977	3.87775
Italy (Ligurian Sea/Tyrrhenian Sea)	434	0.002637	0	0.0066714	0.0066714	0.00241756	0.00156704	2.89141
Corsica, Sardinia	435	0.003491	0	0.00788064	0.00788064	0.00300545	0.00198405	1.38852
Venetian Coast	436	0.002637	0	0.0046875	0.0046875	0.002034	0.00129341	0.880724
Po	437	0	0	0.00346934	0.00346934	0.000992743	0.00129212	0.943106
Velika Morava	438	0.003201	0	0.00703561	0.00703561	0.00394608	0.00165384	0.658996
Drava(YG/HU)/Drau(OS)	439	0	0	0.00576137	0.00576137	0.00105949	0.00189102	0.514911
Sava	440	0.002759	0	0.00641982	0.00641982	0.00270061	0.00173359	2.48456
Tisza(HU)/Tisa(RS/YU)	441	0.004239	0	0.00761248	0.00761248	0.00378576	0.00190476	7.20808
Inn	442	0	0	0.00223912	0.00223912	8.98645e-05	0.000439479	0.0268695
Danube/Donau(DL)/Duna(HU)/Dunav(YG/BU)/Dunarea(RO)	443	0.00364	0	0.0131069	0.0131069	0.00317613	0.0026665	19.1584
Baltic Sea Coast (West)	444	0	0	0.0090223	0.0090223	0.000937956	0.0021761	0.744737
Elbe(DL)/Labe(CZ)	445	0	0	0.0112395	0.0112395	0.000855325	0.00186364	2.08614
Rhone	446	0.002637	0	0.00764373	0.00764373	0.00211942	0.00191578	2.45216
North Sea Coast	447	0	0	0.0048062	0.0048062	0.000575346	0.00108166	0.537373
Weser	448	0	0	0.00455324	0.00455324	0.000612119	0.00122377	0.475004
Mosel(DL)/Moselle(FR)	449	0.002239	0	0.00275965	0.00275965	0.00134135	0.00130439	0.676039
Rhine/Rhein(DL) (except Mosel)	450	0	0	0.00580534	0.00580534	0.000649845	0.00129806	1.30749
Denmark	451	0	0	0.00318168	0.00318168	0.000982458	0.0013239	0.756493
Sweden	452	0	0	0.003114	0.003114	0.000325927	0.000852903	2.71953
Norway	453	0	0	0	0	0	0	0
Common to Norway-Finland-USSR	454	0	0	0	0	0	0	0
Common to Norway-Sweden	455	0	0	0.00263799	0.00263799	0.000353887	0.000790132	0.391045
France (Mediterranean Sea Coast)	456	0.002637	0	0.00894221	0.00894221	0.00259678	0.00277699	0.594663
Spain (South-East Coast)	457	0.005771	0	0.0199578	0.0199578	0.00602068	0.00293253	8.84438
Ebro	458	0.004552	0	0.0156268	0.0156268	0.00468499	0.00251001	5.72037
Garonne	459	0.002637	0	0.00560043	0.00560043	0.0019512	0.00152563	1.59413
Dordogne	460	0.002239	0	0.00455324	0.00455324	0.00126245	0.00126179	0.460794
Loire	461	0.002239	0	0.00541401	0.00541401	0.00151385	0.00142133	2.93535
Seine	462	0	0	0.00307058	0.00307058	0.00112634	0.00128733	1.22659
Meuse(FR)/Maas(NL)	463	0	0	0.00318168	0.00318168	0.000845337	0.00123861	0.402381
Escaut(FR)/Schelde(BX)	464	0	0	0.00221995	0.00221995	1.14136e-05	0.000158768	0.00443989
France (Atlantic Ocean Coast)	465	0.002239	0	0.00455324	0.00455324	0.00179618	0.00121811	1.21422
English Channel Coast	466	0	0	0.00455324	0.00455324	0.00103358	0.00117388	1.16071
Guadalquivir	467	0.005922	0	0.0223131	0.0223131	0.00546122	0.00272299	4.50004
Guadiana	468	0.006491	0	0.0154086	0.0154086	0.0058605	0.00324063	5.20413
Spain/Portugal (South Coast)	469	0	0	0.023812	0.023812	0.00423902	0.00608182	1.53877
Portugal (West Coast)	470	0	0	0.00545966	0.00545966	0.00171447	0.00187494	0.193735
Tajo(SP)/Tejo(PO)	471	0.005646	0	0.03847	0.03847	0.00521914	0.00468425	4.43627
Duero(SP)/Douro(PO)	472	0.004155	0	0.025998	0.025998	0.00381638	0.00443103	3.75532
Mino(SP)/Minho(PO), Limia(SP)/Lima(PO)	473	0.002571	0.00257127	0.00257127	0	0.00257127	0	0.00257127
Spain (North and West Coast)	474	0.002571	0.00257127	0.00490349	0.00233222	0.00280318	0.000695056	0.426083
Central England	475	0	0	0.00888099	0.00888099	0.00077226	0.00250241	0.124334
Wales (except Severn)	476	0	0	0.0048062	0.0048062	2.42126e-05	0.000340271	0.00961239
South England	477	0	0	0.0048062	0.0048062	0.000652634	0.00142046	0.380485
East England	478	0	0	0.00904543	0.00904543	0.00152195	0.00293802	0.674225
North England	479	0	0	0.00888099	0.00888099	0.000826091	0.00220145	0.756699
Scotland	480	0	0	0.00263799	0.00263799	0.000157	0.000624111	0.213677
Ireland (except Shannon)	481	0	0	0.00263799	0.00263799	7.31613e-05	0.000433181	0.0923295
Shannon	482	0	0	0	0	0	0	0
Iceland	483	0	0	0	0	0	0	0
Kura	484	0.008508	0	0.0186372	0.0186372	0.00892377	0.00299319	10.1553
Euphrates-Tigris	485	0.008917	0.00551355	0.00988431	0.00437076	0.00851608	0.00110781	0.987865
Greenland	486	0.004015	0.00367075	0.870905	0.867235	0.106977	0.236595	1493.29

## Sheet: #7.Damage CFs subcountry - II
		Units are %crop diversity loss*m3 soil/g salt in soil (CDL per g salt in 1 m3 soil)
SUB-COUNTRY REGION	ID	MEDIAN	MIN	MAX	RANGE	MEAN	STD	SUM
Medjerda	1	0.007719	0.00110019	0.0168458	0.0157456	0.00773406	0.00272339	2.56771
Chott Melhir, Chott Rharsa	2	0.0194	0	0.312931	0.312931	0.0514616	0.0775589	66.0252
Chott Djerid	3	0.30134	0	2.76074	2.76074	0.404728	0.336531	2947.63
Mediterranean Sea Coast (Western Part)	4	0.010549	0	0.0417169	0.0417169	0.0111085	0.00646269	26.3272
Chott el Hodna	5	0.00909	0	0.0173918	0.0173918	0.00773798	0.00380223	2.39877
Chott ech Chergui	6	0.01269	0	0.0184182	0.0184182	0.0120388	0.00432521	7.01862
Tafna	7	0.010853	0.00671792	0.0163323	0.00961437	0.0108331	0.00237916	0.888313
Moulouya	8	0.01229	0	0.0182627	0.0182627	0.0125724	0.00251102	8.46121
North-West Coast	9	0.109801	0	0.814536	0.814536	0.119562	0.104627	554.768
Oued Guir, Oued Daoura, Oued Dra	10	0.084928	0	1.78392	1.78392	0.322376	0.459447	836.245
Atui	11	0.150814	0	0.528651	0.528651	0.189631	0.123343	46.8388
Senegal	12	0.009987	0	0.340679	0.340679	0.0417221	0.065229	140.812
Gambia	13	0.004439	0	0.0145333	0.0145333	0.00507731	0.00474094	2.6402
Geba(GW)/Kayanga(SG)	14	0	0	0.00643684	0.00643684	0.000860789	0.0021116	0.0964084
Corubal(GW)/Koliba(GN)	15	0	0	0	0	0	0	0
South-West Coast	16	0	0	0.0653608	0.0653608	0.00371052	0.0108735	6.44146
Kolenta(GN)/Great Scarcies(SL)	17	0	0	0	0	0	0	0
Little Scarcies	18	0	0	0	0	0	0	0
Moa	19	0	0	0	0	0	0	0
Mano	20	0	0	0	0	0	0	0
Lofa	21	0	0	0	0	0	0	0
Saint Paul	22	0	0	0	0	0	0	0
Saint John	23	0	0	0	0	0	0	0
Cestos	24	0	0	0	0	0	0	0
Cavally	25	0	0	0	0	0	0	0
Gulf of Guinea	26	0	0	0.00649243	0.00649243	0.000106765	0.000675468	0.489946
Sassandra	27	0	0	0.00535432	0.00535432	2.07496e-05	0.000331996	0.0159979
Komoe	28	0	0	0.0129107	0.0129107	0.000528188	0.00181896	0.463221
Bia	29	0	0	0	0	0	0	0
Tano	30	0	0	0	0	0	0	0
Volta	31	0	0	0.0410309	0.0410309	0.00244136	0.00456108	10.3025
Mono	32	0	0	0.00425864	0.00425864	0.000448393	0.0011077	0.0986464
Oueme	33	0	0	0.00356901	0.00356901	0.000201204	0.000678185	0.124344
Niger (except Benue)	34	0	0	0.402135	0.402135	0.0210244	0.0451955	346.903
Benue	35	0	0	0.0236266	0.0236266	0.00166555	0.00314005	4.55362
Cross	36	0	0	0	0	0	0	0
Lake Chad	37	0.052331	0	2.95616	2.95616	0.241109	0.365197	5399.16
Sanaga	38	0	0	0.00332532	0.00332532	1.97024e-05	0.000255203	0.0299279
Nyong	39	0	0	0.00282907	0.00282907	2.09045e-05	0.000242288	0.00848722
Ntem	40	0	0	0.00282907	0.00282907	1.45454e-05	0.000202332	0.00565814
Benito	41	0	0	0	0	0	0	0
Utamboni, M'Bei	42	0	0	0	0	0	0	0
Ogooue	43	0	0	0	0	0	0	0
Nyanga	44	0	0	0	0	0	0	0
Kouilou	45	0	0	0	0	0	0	0
Chiloango	46	0	0	0	0	0	0	0
Zaire(ZR)/Congo(CG)	47	0	0	0.00725492	0.00725492	4.96991e-05	0.000498678	0.804877
Sangha	48	0	0	0	0	0	0	0
Oubangui	49	0	0	0	0	0	0	0
Kwa	50	0	0	0.00534174	0.00534174	0.000347722	0.00122399	3.63265
Ruki	51	0	0	0	0	0	0	0
Lomami	52	0	0	0	0	0	0	0
Lake Tanganyika	53	0	0	0.00477744	0.00477744	0.000349706	0.00107854	0.854332
Angola Coast	54	0	0	0.181564	0.181564	0.0025565	0.00885767	11.563
Cunene	55	0	0	0.0558476	0.0558476	0.00193749	0.00533147	1.97818
Etosha	56	0.009714	0	0.0430742	0.0430742	0.0137649	0.0111584	19.4773
Okavango(NM)/Cubango(AN)	57	0.022181	0	0.0474236	0.0474236	0.0197127	0.0160763	170.377
Namibia Coast	58	0.029228	0	3.18	3.18	0.0715344	0.216534	201.226
Orange (Oranje)	59	0.02993	0	0.115576	0.115576	0.0327495	0.0217346	390.963
Cape Coast	60	0.006372	0	0.0571869	0.0571869	0.00885391	0.00916617	42.8706
Mediterranean Sea Coast (Eastern Part)	61	1.38258	0	3.18	3.18	1.54891	1.24909	32699
Nile	62	0.644317	0	3.18	3.18	1.10057	1.07228	10038.3
Blue Nile/Bahr al-Azraq(SU)/Abbay(ET)	63	0.005416	0	0.0604373	0.0604373	0.0067069	0.00731505	26.1904
Atbara	64	0.010883	0	0.291054	0.291054	0.0340438	0.0577893	61.6534
Sobat	65	0.004243	0	0.00728625	0.00728625	0.00327814	0.00215336	9.19846
Bahr el Ghazel	66	0	0	0	0	0	0	0
Lake Mobutu-Sese Seko (Lake Albert)	67	0	0	0.00485516	0.00485516	0.000672086	0.00137331	0.465756
Lake Victoria	68	0	0	0.00573595	0.00573595	0.00139683	0.00211727	2.09384
Kagera	69	0	0	0.00393425	0.00393425	0.00013477	0.000633078	0.0822099
Mara	70	0.003308	0	0.00429078	0.00429078	0.00282357	0.0013952	0.432007
Victoria Nile	71	0	0	0.00331117	0.00331117	1.30361e-05	0.000207352	0.00993351
White Nile, Bahr el Jebel	72	0.005241	0	0.12507	0.12507	0.0160499	0.0242942	171.349
Gash	73	0.027114	0	0.213692	0.213692	0.0302656	0.0279711	17.6751
Baraka	74	0.048385	0	0.119202	0.119202	0.0495048	0.028397	39.9999
Read Sea Coast, Gulf of Aden	75	0.046026	0	3.11	3.11	0.188377	0.343927	511.632
Awash	76	0.007042	0	0.0239677	0.0239677	0.00745441	0.00493526	7.28295
Wabi Shebelli	77	0.011168	0	0.0617968	0.0617968	0.0149598	0.0120326	102.565
Ogaden	78	0.028098	0.00509183	0.140394	0.135302	0.034702	0.0182072	60.5896
Juba	79	0.011356	0	0.0706099	0.0706099	0.0152761	0.0124368	37.3959
Lake Turkana (Lake Rudolf)	80	0.012061	0	0.0372072	0.0372072	0.0122629	0.00916169	6.59746
Omo	81	0	0	0.0244396	0.0244396	0.00290628	0.00411937	2.82781
Chewabahir (Lake Stephanie)	82	0.004624	0	0.0265801	0.0265801	0.0052649	0.00553185	3.11682
Lake Natron	83	0.005255	0	0.0105746	0.0105746	0.00489018	0.0028559	1.00249
Umba	84	0	0	0.00230907	0.00230907	9.48309e-05	0.000450129	0.00445705
Great Ruaha	85	0	0	0.0104233	0.0104233	0.00181308	0.0025482	4.36227
Great Rift Valley	86	0	0	0.0149919	0.0149919	0.00275518	0.00349282	3.46051
Ruvuma	87	0	0	0.00552231	0.00552231	0.000192145	0.000839882	0.342402
Lake Rukwa	88	0	0	0.00615931	0.00615931	0.000886012	0.00200845	0.665395
Zambezi (except Shire)	89	0	0	0.0260699	0.0260699	0.00265378	0.00440562	35.2422
Shire	90	0	0	0.0071061	0.0071061	0.00136704	0.00212361	1.70743
Pungue, Buzi	91	0	0	0.0145252	0.0145252	0.000752807	0.00176916	0.503628
Save(MZ)/Sabi(ZW)	92	0	0	0.0330681	0.0330681	0.00483662	0.00900941	6.39885
Limpopo	93	0.010484	0	0.0464087	0.0464087	0.0165276	0.0121907	83.4146
Incomati	94	0.005619	0	0.0196915	0.0196915	0.00489381	0.00381089	2.9265
Umbeluzi	95	0.006359	0	0.0215644	0.0215644	0.00995959	0.00684841	1.05572
Maputo	96	0.004304	0	0.0218563	0.0218563	0.00350973	0.0032721	1.33721
East Coast, South West Indian Ocean	97	0	0	0.205077	0.205077	0.00969722	0.0216308	143.752
Nadym, Pur, Taz, Chatanga, Anabar, Olenok	98	0.00326	0	0.00518405	0.00518405	0.00254979	0.00161473	128.311
Jana, Indigirka, Kolyma	99	0.004706	0	0.00711102	0.00711102	0.00438249	0.00155058	84.8495
Lake Chany, Lake Kulundinskoe	100	0.005749	0	0.0122394	0.0122394	0.0052572	0.0024436	10.8403
Arabian Sea	101	0.050394	0	0.183411	0.183411	0.0558129	0.0327671	39.9062
Korea (Southern Part)	102	0	0	0.00266164	0.00266164	0.000887213	0.00125471	0.436509
Mongolia (Internal Basins)	103	0.024301	0	0.276881	0.276881	0.0377142	0.0415969	945.532
Shikoku	104	0.002661	0	0.00334052	0.00334052	0.00160804	0.00136579	0.255679
Kyushu	105	0	0	0.00334052	0.00334052	0.000655318	0.00119032	0.203804
Honshu (Japan Sea Coast)	106	0	0	0.00334052	0.00334052	0.000949164	0.00141055	0.679601
Honshu (Pacific Coast)	107	0	0	0.00334052	0.00334052	0.000806963	0.00128421	0.982074
Hokkaido	108	0	0	0.00334052	0.00334052	0.000700877	0.00128836	0.372866
Xi	109	0	0	0.00313487	0.00313487	6.07099e-05	0.000346497	0.253889
Han	110	0	0	0.0042856	0.0042856	0.000919302	0.00144688	0.662817
Yangtze/Chang(CI),Siang	111	0	0	0.00500322	0.00500322	0.000906194	0.00135168	14.7483
Yellow River/Hwang(CI)	112	0.005154	0	0.06381	0.06381	0.00882251	0.00931088	76.103
Liao	113	0.005259	0	0.00683737	0.00683737	0.00484078	0.00136947	9.56538
Han	114	0	0	0	0	0	0	0
Tumen	115	0.00394	0	0.00410447	0.00410447	0.0036733	0.000849372	0.393043
Red River/Hongha(VN)	116	0	0	0.00412234	0.00412234	0.000443064	0.00110049	0.827643
Ma	117	0	0	0.00320122	0.00320122	8.38016e-06	0.000163574	0.00320122
Ca	118	0	0	0	0	0	0	0
Vietnam (Middle Part)	119	0	0	0.00412234	0.00412234	0.000178724	0.000831711	0.0806046
Vietnam (Southern Part)	120	0	0	0.00431127	0.00431127	0.000245151	0.000781424	0.244416
Mekong	121	0	0	0.00379564	0.00379564	0.000181019	0.000669557	1.53775
Gulf of Thailand,Pakchan	122	0	0	0.00542441	0.00542441	0.000211065	0.000837746	0.333272
Chao Phraya	123	0	0	0.00480463	0.00480463	0.000393696	0.00117207	0.883454
Tenannerim Coast	124	0	0	0.00320122	0.00320122	9.71539e-06	0.000176087	0.00640244
Salween	125	0	0	0.00366379	0.00366379	0.000227123	0.000762009	0.42154
Sittang	126	0	0	0.00389717	0.00389717	9.80019e-05	0.000571094	0.0408668
Irrawaddy	127	0	0	0.00530202	0.00530202	0.000378511	0.0011476	1.84108
Kaladan, Arakan Coast	128	0	0	0.00228516	0.00228516	2.72971e-05	0.00024826	0.0319922
Karnaphuli	129	0	0	0	0	0	0	0
Sri Lanka	130	0.003201	0	0.0114828	0.0114828	0.00244612	0.0021035	1.81992
Godavari	131	0.003583	0	0.0121155	0.0121155	0.0035563	0.00211449	12.3012
Mahanadi	132	0	0	0.00433405	0.00433405	0.000724866	0.00146649	1.13949
India (East Coast)	133	0.004706	0	0.0136303	0.0136303	0.00409435	0.00336959	31.9195
India (West Coast)	134	0.004567	0	0.107556	0.107556	0.0131452	0.0233333	90.5048
Meghna	135	0	0	0.00228516	0.00228516	2.38783e-06	7.383e-05	0.00228516
Kosi	136	0	0	0.00334052	0.00334052	0.00137514	0.00144811	0.728826
Gandak	137	0	0	0.00334052	0.00334052	0.0013006	0.0014739	0.71273
Ghaghra	138	0.002767	0	0.00406349	0.00406349	0.00193007	0.00161497	2.91634
Yamuna	139	0.004823	0	0.0349949	0.0349949	0.00492866	0.00420558	19.9759
Ganges/Ganga(IN)	140	0	0	0.00515713	0.00515713	0.0016104	0.00176806	7.73476
Ulungur	141	0.032416	0	0.0656654	0.0656654	0.0310852	0.0107191	30.992
Char Us Nuur	142	0.012489	0	0.0382843	0.0382843	0.0140747	0.00676282	26.1789
Uvs Nuur	143	0.004919	0	0.0153474	0.0153474	0.00540846	0.00256118	4.78108
Khuram	144	0.014996	0.0125799	0.0164407	0.0038608	0.0148277	0.00100869	0.726555
Gomal	145	0.032517	0.0196357	0.0358684	0.0162327	0.0315412	0.00377785	2.27096
Kabul	146	0.006245	0.00278598	0.0120756	0.00928959	0.00659854	0.00234175	1.95317
Sutlej	147	0.021719	0	0.183534	0.183534	0.0320377	0.0343731	85.5087
Ravi	148	0.006241	0	0.0513483	0.0513483	0.0147916	0.0156915	6.43435
Chenab	149	0.005756	0	0.0897059	0.0897059	0.0150806	0.017305	10.5564
Jhelum	150	0.004588	0	0.0552017	0.0552017	0.00897131	0.00987753	4.05503
Indus	151	0.073852	0	0.213459	0.213459	0.073265	0.0517109	309.618
Pishin Lora	152	0.112648	0	0.232883	0.232883	0.107115	0.0417374	49.7015
Dasht	153	0.017584	0.0132557	0.0233811	0.0101255	0.0177613	0.00271689	0.834783
Helmand	154	0.102372	0	0.414639	0.414639	0.111713	0.0896271	113.166
Daryachech, Sistan	155	0.064782	0	0.498142	0.498142	0.0862675	0.100557	105.764
Iran (Central Basin)	156	0.030099	0	0.548075	0.548075	0.0618183	0.0873234	484.037
Iran (Persian Gulf Coast)	157	0.027446	0	0.0786511	0.0786511	0.0263257	0.0169217	52.1776
Karun	158	0.01795	0	0.0792474	0.0792474	0.0187185	0.0155856	18.6998
Lake Rezayeh	159	0.010142	0	0.0160068	0.0160068	0.00926226	0.00475644	3.56597
Caspian Sea (South Coast)	160	0.010845	0	0.085082	0.085082	0.0127582	0.0115712	16.3178
Tarim	161	0.12013	0	0.408987	0.408987	0.12228	0.0651827	969.556
Ural, Emba	162	0.012922	0	0.0377357	0.0377357	0.0140481	0.0066614	103.521
Atrek, Harirud(AH)/Tedzen(RS), Murgab	163	0.029414	0	0.0985514	0.0985514	0.0314341	0.0209489	212.463
Amu Darya	164	0.025961	0	0.0895431	0.0895431	0.0285048	0.0199166	90.1036
Syr Darya	165	0.018461	0	0.07576	0.07576	0.0253349	0.0212566	91.8137
Chu, Talas, Asse, Lake Issykkul	166	0.019366	0	0.0571346	0.0571346	0.0248309	0.0176054	55.3232
Lake Balkhash, Lake Alakol	167	0.012993	0	0.0679693	0.0679693	0.015471	0.011732	96.3072
Central Kazakhstan	168	0.01462	0	0.0852795	0.0852795	0.0205919	0.0187592	348.292
Ob (Lower part), Tobol	169	0	0	0.0164757	0.0164757	0.00199243	0.00277914	28.4599
Irtish	170	0.005575	0	0.0365019	0.0365019	0.0053447	0.00430101	95.7183
Ob (Upper and middle part)	171	0	0	0.0109678	0.0109678	0.000811182	0.00161135	15.8164
Yenisey	172	0.003437	0	0.00541215	0.00541215	0.00219324	0.00184665	43.799
Angara	173	0	0	0.00507371	0.00507371	0.000762008	0.00159316	4.6231
Lake Baikal	174	0.004695	0	0.00805221	0.00805221	0.00444775	0.00178273	8.05043
Japan Sea Coast	175	0.0027	0	0.00384533	0.00384533	0.00221236	0.00123576	0.61946
Sakhalin, Kuril Islands	176	0	0	0.00237915	0.00237915	0.000129954	0.00054064	0.092787
Lena	177	0.004986	0	0.00729172	0.00729172	0.00494803	0.00106282	160.801
Kamchatka	178	0	0	0	0	0	0	0
Okhotsk Sea, Bering Sea	179	0.002289	0	0.00457981	0.00457981	0.00171605	0.00162578	14.2192
Bo Hai Coast	180	0.004691	0	0.00659118	0.00659118	0.00463136	0.00113228	15.4548
Korea (Northern Part)	181	0.002661	0	0.00386654	0.00386654	0.00223242	0.0010762	1.00236
Yalu(CI)/Amnok(KR)	182	0.002831	0.00227441	0.00283168	0.00055727	0.00269138	0.000210841	0.201853
South-East Coast	183	0	0	0.00412234	0.00412234	0.000161483	0.000562049	0.748149
Arabian Peninsula	184	0.150561	0	0.852548	0.852548	0.197737	0.161037	5582.52
Amur(RS)/Heilong(CI)	185	0.00328	0	0.0108932	0.0108932	0.00330143	0.00221776	62.1891
Brahmaputra(IN)/Jamuna(BW)	186	0	0	0.00334052	0.00334052	0.000292194	0.000833164	0.858758
Euphrates-Tigris (see also VI.)	187	0.016652	0	0.169439	0.169439	0.0421212	0.047173	353.439
Caleufu, Corcovado, Palena,Manso,Futaleu	188	0.002661	0	0.00480531	0.00480531	0.00224925	0.00129941	0.575808
Gallegos, Chico	189	0.002723	0	0.0139583	0.0139583	0.00455499	0.00372716	0.683249
Lago Fagnano	190	0	0	0	0	0	0	0
Chile (Southern Part)	191	0	0	0.0184913	0.0184913	0.00231375	0.00378452	6.68212
Chile (Northern Part)	192	0.038767	0	2.48	2.48	0.146873	0.27023	451.487
Puna Endorheic Basins,Salinas Grandes	193	0.009605	0	0.0588972	0.0588972	0.0120677	0.00978624	49.5378
Laguna Merin	194	0.002723	0	0.0027753	0.0027753	0.00248813	0.000613588	0.731511
Uruguay	195	0.002021	0	0.00384242	0.00384242	0.00151359	0.00129973	5.82732
Paraguay (Lower Part)	196	0.004603	0	0.0381331	0.0381331	0.00526789	0.00471462	32.4555
Paraguay (Middle Part)	197	0.003296	0	0.0139831	0.0139831	0.00383499	0.00341698	17.7023
Paraguay (Upper Part)	198	0	0	0.00364856	0.00364856	0.0014675	0.00149405	4.20733
Parana (between Paraguay and Uruguay)	199	0.003599	0	0.0232744	0.0232744	0.00402469	0.00252563	25.0778
Parana (between Iguazu and Paraguay)	200	0	0	0.00342462	0.00342462	0.000812134	0.00128596	1.28642
Parana (between Paranapanema and Iguazu)	201	0	0	0	0	0	0	0
Parana (between Tiete and Paranapanema)	202	0	0	0	0	0	0	0
Parana (between Grande and Tiete)	203	0	0	0	0	0	0	0
Grande	204	0	0	0	0	0	0	0
Paranaiba	205	0	0	0	0	0	0	0
Rio de la Plata	206	0.002264	0	0.00562307	0.00562307	0.00238129	0.000771468	5.13645
Laguna Blanca,Cancosa,Todos los Santos,Lauca, Cosa Pilla	207	0.015841	0	0.138169	0.138169	0.0292961	0.0343631	27.5091
Lago Titicaca, Lago de Poopo	208	0.008672	0	0.0543488	0.0543488	0.00931194	0.0106629	5.95033
Brazil (South East)	209	0	0	0.0112926	0.0112926	0.000917984	0.00224738	2.63094
Brazil (East)	210	0	0	0.0127073	0.0127073	0.00121009	0.00269098	7.86434
Sao Francisco	211	0	0	0.0150765	0.0150765	0.00136715	0.00348371	9.09699
Brazil (North and North East)	212	0	0	0.014688	0.014688	0.00123774	0.00306219	16.6192
Tocantins	213	0	0	0.00267544	0.00267544	9.23334e-06	0.000156901	0.0775877
Tumbes	214	0.007544	0.00440545	0.0113603	0.00695482	0.00778672	0.00199854	0.241388
Chira	215	0.007629	0.00321241	0.829543	0.826331	0.0574323	0.143584	5.8581
Peru (Pacific Ocean)	216	0.080244	0	3.18	3.18	0.359105	0.650817	361.978
Ecuador (Pacific Ocean)	217	0	0	0.0174564	0.0174564	0.00173432	0.00241648	1.70483
Mira	218	0	0	0.0028396	0.0028396	0.000281032	0.000750228	0.0337238
Patia	219	0	0	0.0022548	0.0022548	0.00047572	0.000918979	0.0922898
Colombia (Pacific Ocean)	220	0	0	0.00334052	0.00334052	0.000332606	0.00100022	0.153664
Amazon (d/s Xingu confluence - mouth)	221	0	0	0	0	0	0	0
Amazon (d/s Tapajos confluence - d/s Xingu confluence)	222	0	0	0	0	0	0	0
Amazon (d/s Trombetas confluence - d/s Tapajos confluence)	223	0	0	0	0	0	0	0
Amazon (d/s Madeira confluence - d/s Trombetas confluence)	224	0	0	0	0	0	0	0
Amazon (d/s Negro confluence - d/s Madeira confluence)	225	0	0	0	0	0	0	0
Amazon (d/s Purus confluence - d/s Negro confluence)	226	0	0	0	0	0	0	0
Amazon (u/s Lago Coari - d/s Purus confluence)	227	0	0	0	0	0	0	0
Amazon (d/s Jutai confluence - u/s Lago Coari	228	0	0	0	0	0	0	0
Amazon (d/s Javari confluence - d/s Jutai confluence)	229	0	0	0	0	0	0	0
Amazon (headwaters - d/s Javari confluence)	230	0	0	0.00582468	0.00582468	0.000292816	0.000999354	2.11823
Caqueta(CO)/Japura(BZ)	231	0	0	0	0	0	0	0
Putumayo(CO)/Ica(BZ)	232	0	0	0	0	0	0	0
Napo	233	0	0	0	0	0	0	0
Negro	234	0	0	0	0	0	0	0
Mamore	235	0	0	0.0117643	0.0117643	0.00127848	0.00274328	8.57987
Beni	236	0	0	0.0104542	0.0104542	0.000109248	0.000934335	0.238051
Oyapock(FG)/Oiapoque(BZ)	237	0	0	0.00334052	0.00334052	2.14824e-05	0.000267022	0.00668103
French Guiana (Atlantic Ocean)	238	0	0	0.00334052	0.00334052	0.000150216	0.000692267	0.0701509
Maroni(FG)/Marowijne(SM)	239	0	0	0.00412234	0.00412234	9.71726e-06	0.000191214	0.00746286
Suriname (Atlantic Ocean)	240	0	0	0.00412234	0.00412234	0.000274627	0.000959997	0.212012
Courantijn(SM)/Corentyne(GY)	241	0	0	0.00334052	0.00334052	5.30943e-05	0.000417784	0.0400862
Guyana (Atlantic Ocean)	242	0	0	0.00334052	0.00334052	0.000649254	0.00132186	0.207112
Essequibo, Amacuro, Barima	243	0	0	0.00334052	0.00334052	1.59072e-05	0.000229968	0.0267241
Orinoco	244	0	0	0.00485511	0.00485511	0.000135432	0.000600787	1.42908
Venezuela (Caribbean Sea Coast)	245	0	0	0.0197642	0.0197642	0.00297058	0.0037044	6.0184
Catatumbo	246	0	0	0.00334052	0.00334052	0.00122729	0.00137828	0.278596
Magdalena	247	0	0	0.00740831	0.00740831	0.0015062	0.00169389	3.20669
Colombia (Caribbean Sea Coast)	248	0	0	0.0140718	0.0140718	0.00162108	0.00290857	1.62594
Lago San Martin(AG)/Lago O'Higgins(CH)	249	0.002834	0.00266164	0.00438014	0.00171851	0.00304893	0.000457127	0.091468
Lago Pueyrredon(AG)/Lago Cochrane(CH)	250	0.002905	0	0.00567344	0.00567344	0.00274622	0.00138444	0.170266
Patagonia (Internal Basins)	251	0.068512	0.00308153	0.141303	0.138222	0.0687732	0.0330654	31.9796
Lago Buenos Airea(AG)/Lago General Carrera(CH), Baker	252	0.008018	0	0.0250281	0.0250281	0.00712756	0.00740568	0.61297
Patagonia (Atlantic Ocean)	253	0.03291	0	0.148384	0.148384	0.0365064	0.0269624	189.687
Argentina (Atlantic Ocean)	254	0.012726	0	0.156636	0.156636	0.0238764	0.0249217	298.981
Alaska (Arctic Ocean)	255	0.003061	0	0.00620134	0.00620134	0.00261108	0.00186848	23.1106
Alaska (Pacific Ocean)	256	0	0	0.0112926	0.0112926	0.000365218	0.00169965	3.11421
Yukon	257	0.002661	0	0.00846811	0.00846811	0.00245878	0.00259751	46.4192
Stikine	258	0.002661	0	0.00325347	0.00325347	0.00195226	0.00134688	0.860947
Canada (Pacific Ocean/South+North)	259	0	0	0.0049914	0.0049914	0.000321876	0.00111887	0.832693
Fraser	260	0.00414	0	0.0113948	0.0113948	0.00348471	0.00244467	13.0851
Mackenzie	261	0.002661	0	0.00754475	0.00754475	0.00226542	0.00234752	81.2447
Canada (Arctic Ocean)	262	0.00634	0	0.0184559	0.0184559	0.00662017	0.00256412	324.554
Nelson	263	0.00446	0	0.0134411	0.0134411	0.00374238	0.00259274	71.1539
Hudson Bay	264	0	0	0.00764096	0.00764096	0.00198795	0.00226879	92.9209
Columbia (except Snake)	265	0.00248	0	0.0334416	0.0334416	0.00395341	0.00535633	25.1635
Snake	266	0.007028	0	0.0447185	0.0447185	0.00810942	0.006602	35.5922
USA (Internal Basins)	267	0.026442	0	0.336153	0.336153	0.03829	0.0430476	334.539
Upper Mississippi	268	0.003054	0	0.00582382	0.00582382	0.00204502	0.00184447	14.5565
Upper Missouri	269	0.008029	0	0.0263693	0.0263693	0.00906064	0.00343574	63.7688
Middle Missouri	270	0.005837	0.0029659	0.0155016	0.0125357	0.0066245	0.00254666	44.3444
Lower Missouri	271	0.005397	0	0.0216972	0.0216972	0.00661839	0.0043218	53.4568
Ohio	272	0	0	0.00467158	0.00467158	0.000438802	0.00107032	3.31822
Arkansas	273	0.006645	0	0.0339451	0.0339451	0.00836562	0.00671357	50.8379
Red	274	0.002665	0	0.0102759	0.0102759	0.00300044	0.00320395	9.72742
Lower Mississippi	275	0	0	0.00359824	0.00359824	0.000511517	0.00110963	1.7586
St.John, St.Croix	276	0	0	0.00414063	0.00414063	0.000475838	0.00132055	0.472031
Lake Superior	277	0	0	0.00414063	0.00414063	0.000145334	0.000749556	0.304038
Lake Michigan	278	0	0	0.00485315	0.00485315	0.00021648	0.000933171	0.413044
Lake Huron	279	0	0	0.00462358	0.00462358	0.000702792	0.00147661	1.65226
Lake Erie	280	0	0	0.00446616	0.00446616	0.00143145	0.00177849	1.92816
Lake Ontario	281	0	0	0.00432818	0.00432818	0.00136457	0.00187331	1.22947
St.Lawrence	282	0	0	0.00414063	0.00414063	0.000415744	0.00107538	1.87001
Canada (Atlantic Ocean)	283	0	0	0.00414063	0.00414063	0.000126041	0.000711338	1.44922
USA (Pacific Ocean/North)	284	0	0	0.00448195	0.00448195	4.60554e-05	0.00040612	0.0711557
USA (Pacific Ocean/South)	285	0.004726	0	0.0255855	0.0255855	0.00493297	0.00481958	17.1125
USA (Atlantic Ocean/North)	286	0	0	0.00366331	0.00366331	0.000215214	0.0007981	1.17915
USA (Atlantic Ocean/South)	287	0	0	0.00320122	0.00320122	2.17351e-05	0.000248491	0.111458
USA (Gulf of Mexico/East)	288	0	0	0.00261844	0.00261844	0.000117445	0.000522496	0.571486
USA (Gulf of Mexico/West)	289	0.005348	0	0.0292294	0.0292294	0.00556742	0.00402383	37.7861
Grande(US)/Bravo(MX)	290	0.014609	0.00374858	0.102347	0.0985983	0.0198116	0.013621	138.681
Colorado	291	0.020192	0.00353975	0.308965	0.305425	0.0315949	0.033945	295.065
Concepcion, Yagui	292	0.008468	0	0.136177	0.136177	0.0178311	0.0177192	22.0215
Tijuana	293	0.01332	0.0101273	0.0174838	0.00735655	0.0133418	0.00150602	0.653749
Mexico (Pacific Ocean/North)	294	0.021763	0	0.330872	0.330872	0.0385365	0.0458824	169.291
Mexico (Pacific Ocean/South)	295	0.001867	0	0.0134749	0.0134749	0.00237453	0.00278087	11.0344
Mexico (Internal Basins)	296	0.017381	0	0.0610498	0.0610498	0.0217097	0.0132741	72.7275
Mexico (Gulf of Mexico/North)	297	0.004033	0	0.0197058	0.0197058	0.00383448	0.00278968	6.83687
Mexico (Gulf of Mexico/South)	298	0.003082	0	0.0104187	0.0104187	0.002555	0.00199426	5.05635
Hondo	299	0.0021	0	0.00323772	0.00323772	0.00188894	0.000732237	0.156782
Candelaria	300	0.002463	0	0.00294874	0.00294874	0.00226588	0.00074585	0.30816
Usumacinta-Grijalva	301	0	0	0.00480254	0.00480254	0.00105022	0.00143748	1.4073
Coatan, Suchiate	302	0.00187	0	0.00320122	0.00320122	0.00126182	0.00100677	0.0239746
Lempa	303	0	0	0.0045325	0.0045325	0.000276902	0.000999001	0.0587033
Paz	304	0	0	0.00412234	0.00412234	0.000265957	0.00101274	0.00824468
Motagua	305	0.002588	0	0.00447968	0.00447968	0.00168773	0.00154213	0.322357
Honduras (Caribbean Sea),Goascoran	306	0	0	0.00535646	0.00535646	0.000310117	0.000941507	0.26391
Coco	307	0	0	0.00421122	0.00421122	0.000107334	0.000582298	0.0305901
Choluteca, Negro	308	0	0	0.00426091	0.00426091	0.00143468	0.00167354	0.230984
Nicaragua (Pacific Ocean)	309	0	0	0.00213674	0.00213674	0.000631027	0.000893147	0.0530063
Nicaragua (Caribbean Sea)	310	0	0	0.00425059	0.00425059	0.000189516	0.00064044	0.153508
San Juan	311	0	0	0.0045099	0.0045099	0.000872072	0.00133911	0.335748
Costa Rica (Pacific Ocean)	312	0	0	0.00412234	0.00412234	0.00122451	0.0014603	0.372251
Costa Rica (Caribbean Sea)	313	0	0	0.00412234	0.00412234	0.000393004	0.000942745	0.0400864
Sixaola	314	0	0	0	0	0	0	0
Panama (Pacific Ocean)	315	0	0	0.00380742	0.00380742	0.000387852	0.000976292	0.23659
Panama (Caribbean Sea)	316	0	0	0	0	0	0	0
Bahamas	317	0.003855	0	0.00525246	0.00525246	0.00360862	0.00129269	0.393339
Cuba (North)	318	0.002152	0	0.00622696	0.00622696	0.00161395	0.00157728	0.795679
Cuba (South)	319	0	0	0.0048004	0.0048004	0.00117144	0.00135927	0.86218
Dominican Republic	320	0.002721	0	0.00617604	0.00617604	0.00222561	0.00164348	1.21073
Haiti	321	0.002766	0	0.00660039	0.00660039	0.00207305	0.00170798	0.644717
Jamaica	322	0	0	0.00550687	0.00550687	0.00145318	0.00166422	0.149678
Puerto Rico	323	0.002661	0	0.0049964	0.0049964	0.00215019	0.00129706	0.187066
Trinidad and Tobago	324	0	0	0.00334052	0.00334052	0.000693315	0.00135475	0.0367457
Barbados	325	0	0	0	0	0	0	0
Guadeloupe, Martinique	326	0	0	0.00379828	0.00379828	0.00106575	0.00140059	0.0245121
El Salvador (Pacific Ocean)	327	0	0	0.00502913	0.00502913	0.00138548	0.00162133	0.182883
Nacaome	328	0.00222	0	0.00411405	0.00411405	0.00175752	0.001768	0.0773308
Guatemala (Pacific Ocean)	329	0.001867	0	0.0046325	0.0046325	0.00141911	0.00160036	0.3193
Dulce	330	0.003201	0	0.00412234	0.00412234	0.00277958	0.00120999	0.0361345
Belize, Sarstun	331	0	0	0.00412234	0.00412234	0.00102884	0.00124962	0.241778
Changuinola	332	0	0	0	0	0	0	0
Australia (North-East Coast)	333	0.00492	0	0.0239319	0.0239319	0.00532896	0.00532173	28.0303
Australia (South-East Coast)	334	0.003253	0	0.0151089	0.0151089	0.00275235	0.002282	9.86168
Tasmania	335	0.002565	0	0.00545462	0.00545462	0.00161958	0.00163192	1.52888
Murray	336	0.009356	0	0.0532307	0.0532307	0.0133971	0.0106328	190.601
South Australian Gulf	337	0.017138	0	0.0889588	0.0889588	0.02101	0.0221098	304.939
Australia (South-West Coast)	338	0.009185	0	0.0505521	0.0505521	0.0111127	0.0115999	39.6056
Australia (Indian Ocean Coast)	339	0.024095	0	0.0932184	0.0932184	0.0268376	0.0247812	271.167
Australia (Timor Sea Coast)	340	0.006061	0	0.0572862	0.0572862	0.00855452	0.0101697	32.396
Australia (Gulf of Carpentaria)	341	0.004777	0	0.0384846	0.0384846	0.00688501	0.00822309	43.6923
Lake Eyre	342	0.020931	0	0.0983793	0.0983793	0.020841	0.0186999	291.357
Bulloo-Bancannia	343	0.040947	0	0.0836536	0.0836536	0.0369179	0.0211451	58.5517
Australia (Western Plateau)	344	0	0	0.0857993	0.0857993	0.0115491	0.0207114	147.748
Golok	345	0	0	0	0	0	0	0
Perak	346	0	0	0.00334052	0.00334052	0.0001586	0.000710389	0.0534483
Kelantan	347	0	0	0	0	0	0	0
Pahang	348	0	0	0	0	0	0	0
Trengganu	349	0	0	0.00412234	0.00412234	7.27472e-05	0.000542768	0.012367
Langat, Klang, Selangor	350	0	0	0	0	0	0	0
Kerian	351	0	0	0.00334052	0.00334052	0.000190111	0.000773903	0.0233836
Semberong, Johor	352	0	0	0.00412234	0.00412234	0.000259097	0.000907782	0.0650335
Sarawak	353	0	0	0	0	0	0	0
Sabah	354	0	0	0.00277273	0.00277273	2.78316e-05	0.000276396	0.0221818
Singapore	355	0	0	0	0	0	0	0
Sembakung,Borneo (indon.Part)	356	0	0	0.00903409	0.00903409	0.000689003	0.00233642	4.21325
Sumatra	357	0	0	0.00903409	0.00903409	0.000203837	0.00117582	1.01266
Java	358	0	0	0.00453191	0.00453191	0.00123929	0.00141443	1.51814
Bali, Lombok	359	0.00187	0	0.00412234	0.00412234	0.00146848	0.00129925	0.148317
Sumbawa	360	0.00187	0	0.00389991	0.00389991	0.00156922	0.00151146	0.508429
Timor	361	0.003787	0	0.00594594	0.00594594	0.0027745	0.00182642	0.418949
Sulawesi	362	0	0	0.0037468	0.0037468	0.00052113	0.00115791	1.31429
Tami	363	0	0	0.00334052	0.00334052	0.000278376	0.00092327	0.0100216
Sepik	364	0	0	0.00334052	0.00334052	0.000943335	0.00150378	0.851832
Fly	365	0	0	0.00334052	0.00334052	0.000735958	0.0013845	0.471013
New Guinea (Irian Jaya)	366	0	0	0.00364075	0.00364075	0.000537325	0.00121659	2.23742
New Guinea (Eastern Part)	367	0	0	0.00363016	0.00363016	0.000756446	0.00137577	2.01669
Luzon	368	0	0	0.00903409	0.00903409	0.000282472	0.00113034	0.350265
Palawan	369	0	0	0	0	0	0	0
Mindoro	370	0	0	0	0	0	0	0
Panay	371	0	0	0.00186726	0.00186726	0.000350111	0.000728815	0.0448142
Negros	372	0	0	0.00186726	0.00186726	1.6028e-05	0.000172254	0.00373452
Samar	373	0	0	0	0	0	0	0
Mindanao	374	0	0	0.00903409	0.00903409	0.000132881	0.00106445	0.14298
New Caledonia	375	0	0	0.00308171	0.00308171	0.00127512	0.00137032	0.269051
New Zealand (North Island I)	376	0	0	0.00412234	0.00412234	0.000326781	0.00101275	0.207506
New Zealand (North Island II)	377	0	0	0.00266164	0.00266164	0.000102865	0.000513039	0.0212931
New Zealand (North Island III)	378	0	0	0.0112926	0.0112926	0.000423606	0.00159226	0.317281
New Zealand (South Island I)	379	0	0	0.00507196	0.00507196	0.000429216	0.0012627	0.100436
New Zealand (South Island II)	380	0	0	0.00488899	0.00488899	0.00056119	0.00125984	0.280034
New Zealand (South Island III)	381	0	0	0.00497599	0.00497599	0.000606699	0.00135972	0.333685
New Zealand (South Island IV)	382	0	0	0	0	0	0	0
New Zealand (South Island V)	383	0	0	0.00345978	0.00345978	0.000123199	0.000575377	0.0529757
Hawaii	384	0	0	0.00442812	0.00442812	0.000930922	0.00136455	0.0409606
Fiji	385	0.002766	0	0.00276658	0.00276658	0.00249987	0.000763901	0.469975
Solomon Islands	386	0.002766	0	0.00374751	0.00374751	0.00228392	0.00118371	0.824497
Vanuatu	387	0.001797	0	0.00412234	0.00412234	0.00163704	0.00172918	0.186623
Cyprus	395	0.007563	0.0052733	0.0113228	0.00604945	0.00773228	0.00161744	0.618583
Internal Basins, Gulf of Aqaba	396	0.063508	0	0.547107	0.547107	0.0947272	0.10187	161.226
East Mediterranean Coast	397	0.007219	0	0.128991	0.128991	0.0189941	0.0269308	6.62893
Asi	398	0.009506	0.00296019	0.0167467	0.0137865	0.00942201	0.00338107	2.7418
Turkey (Mediterranean Sea Coast)	399	0.00811	0	0.014854	0.014854	0.00748149	0.00291448	8.16231
Turkey (Black Sea Coast)	400	0.00714	0	0.0140677	0.0140677	0.00659121	0.00260041	10.9151
Western Transcaucasus	401	0.004783	0	0.00478395	0.00478395	0.00277778	0.00236066	0.0861111
Northern Caucasus	402	0.009937	0	0.0215319	0.0215319	0.00981847	0.00468763	23.6821
Sea of Azov	403	0.005181	0	0.00944102	0.00944102	0.00556348	0.00203129	10.91
Black Sea Coast (West of Dniepr)	405	0.003643	0	0.00905887	0.00905887	0.00376146	0.00288814	4.96512
Lower Dniepr	406	0.00312	0	0.00957687	0.00957687	0.00414926	0.00273597	7.62634
Upper Dniepr, Bug	407	0.002587	0	0.00587509	0.00587509	0.0025672	0.00255421	15.5315
Don	408	0.006996	0	0.0144829	0.0144829	0.00639418	0.00320995	33.7932
Lower Volga	409	0.007974	0	0.0292452	0.0292452	0.00994092	0.00575813	28.5404
Kama	410	0	0	0.00853	0.00853	0.000844562	0.00174797	6.81308
Upper Volga	411	0	0	0.00643703	0.00643703	0.000700315	0.00147966	10.0866
Neman	412	0	0	0.00519392	0.00519392	0.000913058	0.00171242	1.78412
Western Dvina, Rivers between Western Dvina and Neman	413	0	0	0.00486111	0.00486111	0.000375369	0.00110589	0.986094
Karelia, North-West Russia, Estonia	414	0	0	0	0	0	0	0
Kola Peninsula	415	0	0	0	0	0	0	0
Russia (Northern District)	416	0	0	0.00478395	0.00478395	0.00056575	0.00138042	14.202
Rivers between Volga and Ural	417	0.014568	0	0.0313117	0.0313117	0.0135137	0.00523503	15.1353
Turkey (Aegean Sea Coast)	418	0	0	0.0102452	0.0102452	0.00275109	0.00379454	1.45258
Black Sea Coast (West)	419	0.005374	0	0.0106767	0.0106767	0.0054749	0.00243222	2.11879
Marica(BU)/Meric(TU)/Evros(GR)	420	0.006563	0	0.00891599	0.00891599	0.0055692	0.00220014	4.49434
Mesta(BU)/Nestos(GR), Struma(BU)/Strimon	421	0.00731	0.00486111	0.00956469	0.00470358	0.00748668	0.00115237	1.71445
Vardar(YG)/Axios(GR)	422	0.008656	0.00186726	0.00984306	0.0079758	0.00745452	0.00271553	0.730543
Greece (South)	423	0.007365	0.00558269	0.0132142	0.00763153	0.00776986	0.00158239	2.38535
Greece (North)	424	0.006837	0	0.00985067	0.00985067	0.00651369	0.00227899	2.97024
Albania/Greece (Adriatic Coast)	425	0.004861	0	0.00557442	0.00557442	0.00453686	0.000696087	1.68771
Yugoslavia (Adriatic Coast)	426	0.002766	0.00276658	0.00467187	0.0019053	0.00328647	0.000750061	0.33522
Wisla	427	0	0	0.0099991	0.0099991	0.00136744	0.00235712	4.47562
Odra(PL)/Oder(DL)	428	0	0	0.0119768	0.0119768	0.00147296	0.00284206	3.01073
Baltic Sea Coast (East)	429	0	0	0.00903409	0.00903409	0.00164652	0.00260896	0.637203
Finland (Gulf of Finland)	430	0	0	0	0	0	0	0
Finland (Gulf of Bothnia)	431	0	0	0	0	0	0	0
Sicily	432	0.008857	0	0.0126715	0.0126715	0.00784333	0.00308662	2.81576
Italy (Adriatic Sea/Ionian Sea)	433	0.003795	0	0.010097	0.010097	0.00383127	0.00267271	3.89641
Italy (Ligurian Sea/Tyrrhenian Sea)	434	0.002661	0	0.00661375	0.00661375	0.00243035	0.0015712	2.9067
Corsica, Sardinia	435	0.003536	0	0.00781254	0.00781254	0.0030361	0.00200065	1.40268
Venetian Coast	436	0.002661	0	0.00467187	0.00467187	0.00205165	0.00130254	0.888363
Po	437	0	0	0.00364254	0.00364254	0.00101055	0.00131622	0.960022
Velika Morava	438	0.003229	0	0.00697481	0.00697481	0.0039222	0.00163614	0.655008
Drava(YG/HU)/Drau(OS)	439	0	0	0.00571158	0.00571158	0.00106532	0.00188517	0.517746
Sava	440	0.002766	0	0.00636434	0.00636434	0.00270632	0.00171712	2.48981
Tisza(HU)/Tisa(RS/YU)	441	0.004301	0	0.00754669	0.00754669	0.00379284	0.00192626	7.22157
Inn	442	0	0	0.00237915	0.00237915	9.54844e-05	0.000466964	0.0285498
Danube/Donau(DL)/Duna(HU)/Dunav(YG/BU)/Dunarea(RO)	443	0.003695	0	0.0133328	0.0133328	0.0032022	0.00266569	19.3157
Baltic Sea Coast (West)	444	0	0	0.00917784	0.00917784	0.000946674	0.00219432	0.751659
Elbe(DL)/Labe(CZ)	445	0	0	0.0114332	0.0114332	0.000866695	0.00188278	2.11387
Rhone	446	0.002661	0	0.00757767	0.00757767	0.00213492	0.0019062	2.4701
North Sea Coast	447	0	0	0.00478395	0.00478395	0.000588956	0.00110406	0.550085
Weser	448	0	0	0.00451389	0.00451389	0.000616214	0.0012281	0.478182
Mosel(DL)/Moselle(FR)	449	0.002379	0	0.00276658	0.00276658	0.00136099	0.00132107	0.685941
Rhine/Rhein(DL) (except Mosel)	450	0	0	0.00577847	0.00577847	0.000658528	0.00131117	1.32496
Denmark	451	0	0	0.00334052	0.00334052	0.00100297	0.00135456	0.772283
Sweden	452	0	0	0.00314191	0.00314191	0.000328198	0.000859355	2.73848
Norway	453	0	0	0	0	0	0	0
Common to Norway-Finland-USSR	454	0	0	0	0	0	0	0
Common to Norway-Sweden	455	0	0	0.00266164	0.00266164	0.000354501	0.000792541	0.391723
France (Mediterranean Sea Coast)	456	0.002661	0	0.00886493	0.00886493	0.00259254	0.00275583	0.593692
Spain (South-East Coast)	457	0.00581	0	0.0198654	0.0198654	0.00601836	0.00286781	8.84097
Ebro	458	0.004582	0	0.0155545	0.0155545	0.00468467	0.00248382	5.71998
Garonne	459	0.002669	0	0.00555203	0.00555203	0.00197092	0.00153194	1.61024
Dordogne	460	0.002379	0	0.00451389	0.00451389	0.00130789	0.00129822	0.47738
Loire	461	0.002379	0	0.00536722	0.00536722	0.00156	0.00144929	3.02484
Seine	462	0	0	0.00307828	0.00307828	0.00115889	0.00132033	1.26203
Meuse(FR)/Maas(NL)	463	0	0	0.00334052	0.00334052	0.000856522	0.00125365	0.407704
Escaut(FR)/Schelde(BX)	464	0	0	0.00228516	0.00228516	1.17489e-05	0.000163432	0.00457031
France (Atlantic Ocean Coast)	465	0.002379	0	0.00451389	0.00451389	0.0018397	0.00123816	1.24364
English Channel Coast	466	0	0	0.00451389	0.00451389	0.00106478	0.00120636	1.19574
Guadalquivir	467	0.005965	0	0.0226977	0.0226977	0.00548935	0.0027391	4.52322
Guadiana	468	0.006538	0	0.0153373	0.0153373	0.00587042	0.00322646	5.21293
Spain/Portugal (South Coast)	469	0	0	0.0242225	0.0242225	0.00425311	0.00613436	1.54388
Portugal (West Coast)	470	0	0	0.00541248	0.00541248	0.00172314	0.00188205	0.194715
Tajo(SP)/Tejo(PO)	471	0.005655	0	0.0391332	0.0391332	0.00522436	0.0047177	4.44071
Duero(SP)/Douro(PO)	472	0.004177	0	0.0264462	0.0264462	0.00382994	0.00448339	3.76866
Mino(SP)/Minho(PO), Limia(SP)/Lima(PO)	473	0.002588	0.00258806	0.00258806	0	0.00258806	0	0.00258806
Spain (North and West Coast)	474	0.002588	0.00258806	0.00486111	0.00227305	0.00281431	0.000677371	0.427775
Central England	475	0	0	0.00903409	0.00903409	0.000785573	0.00254555	0.126477
Wales (except Severn)	476	0	0	0.00478395	0.00478395	2.41005e-05	0.000338696	0.0095679
South England	477	0	0	0.00478395	0.00478395	0.000644419	0.0014044	0.375696
East England	478	0	0	0.00920136	0.00920136	0.00153795	0.00298102	0.681313
North England	479	0	0	0.00903409	0.00903409	0.000837149	0.0022363	0.766828
Scotland	480	0	0	0.00266164	0.00266164	0.000158408	0.000629707	0.215593
Ireland (except Shannon)	481	0	0	0.00266164	0.00266164	7.38172e-05	0.000437065	0.0931573
Shannon	482	0	0	0	0	0	0	0
Iceland	483	0	0	0	0	0	0	0
Kura	484	0.008105	0	0.0171463	0.0171463	0.00863708	0.00291423	9.82899
Euphrates-Tigris	485	0.008801	0.00544213	0.00975628	0.00431415	0.00840578	0.00109346	0.97507
Greenland	486	0.004099	0.00374751	0.889117	0.885369	0.109214	0.241542	1524.51

## Sheet: #8.Midpoint CFs country - FI
		Units are dS/m*m3 soil/g salt in soil (electrical conductivity per g salt in 1 m3 soil)
ISO_3DIGIT	COUNTRY	MEDIAN	MIN	MAX	RANGE	MEAN	STD	SUM
AFG	Afghanistan	0.18258	0.0154245	1.53031	1.51489	0.263422	0.247633	1145.36
AGO	Angola	0	0	0.594849	0.594849	0.00672666	0.0190001	96.8033
ALB	Albania	0.019458	0	0.0223136	0.0223136	0.0177969	0.00384972	6.13993
ARE	United Arab Emirates	0.412782	0.0776531	1.72067	1.64301	0.652153	0.483174	548.461
ARG	Argentina	0.029629	0	0.524993	0.524993	0.0652458	0.0756241	2332.67
ARM	Armenia	0.048147	0.023443	0.076298	0.052855	0.0474548	0.0152484	4.50821
ATG	Antigua and Barbuda	0.017275	0.0172754	0.0208359	0.00356048	0.0184623	0.00167843	0.0553868
AUS	Australia	0.040883	0	0.33225	0.33225	0.0622921	0.0667846	5653.7
AUT	Austria	0	0	0.0179646	0.0179646	0.00263485	0.0054393	2.68491
AZE	Azerbaijan	0.036615	0	0.0796261	0.0796261	0.0388036	0.0110292	28.9475
BDI	Burundi	0	0	0.0217982	0.0217982	0.00104279	0.00413367	0.307624
BEL	Belgium	0	0	0.0111727	0.0111727	0.000620864	0.00232354	0.343958
BEN	Benin	0	0	0.0562415	0.0562415	0.00150861	0.00684188	1.79072
BFA	Burkina Faso	0.019388	0	0.175809	0.175809	0.0199952	0.0233746	62.6651
BGD	Bangladesh	0	0	0.0128813	0.0128813	0.00206341	0.00389548	3.46033
BGR	Bulgaria	0.020477	0	0.0369258	0.0369258	0.020486	0.00881267	28.7828
BHR	Bahrain	0.537549	0.509929	0.559558	0.0496284	0.536523	0.0181642	2.68261
BHS	Bahamas	0.01225	0	0.0185247	0.0185247	0.0117685	0.00440379	1.28277
BIH	Bosnia and Herzegovina	0.011172	0	0.0232038	0.0232038	0.0135778	0.00421823	4.86083
BLR	Belarus	0	0	0.0237072	0.0237072	0.00806122	0.0100835	32.6963
BLZ	Belize	0	0	0.0131137	0.0131137	0.00406537	0.00518031	0.833402
BOL	Bolivia	0	0	0.399323	0.399323	0.0211427	0.0471149	216.29
BRA	Brazil	0	0	0.0608163	0.0608163	0.00186382	0.00718078	179.257
BRB	Barbados	0	0	0	0	0	0	0
BRN	Brunei Darussalam	0	0	0	0	0	0	0
BTN	Bhutan	0	0	0	0	0	0	0
BWA	Botswana	0.102796	0	0.281596	0.281596	0.0877225	0.0532694	629.409
CAF	Central African Republic	0	0	0.0335565	0.0335565	0.000813542	0.00381162	5.80625
CAN	Canada	0.013013	0	0.0636537	0.0636537	0.0116269	0.0107321	2140.06
CHE	Switzerland	0	0	0.0194583	0.0194583	0.00111313	0.00421999	0.35175
CHL	Chile	0.016241	0	10	10	0.366943	0.893507	1996.17
CHN	China	0.018087	0	1.84119	1.84119	0.0991247	0.175361	7423.05
CIV	C├┤te d'Ivoire	0	0	0.0472825	0.0472825	0.000706252	0.00399266	2.59124
CMR	Cameroon	0	0	0.0725818	0.0725818	0.0040277	0.011871	20.9722
COD	Congo DRC	0	0	0.0257934	0.0257934	0.000159144	0.00166082	4.26378
COG	Congo	0	0	0	0	0	0	0
COL	Colombia	0	0	0.0451988	0.0451988	0.00184914	0.00522343	21.4852
COM	Comoros	0	0	0	0	0	0	0
CRI	Costa Rica	0	0	0.0131137	0.0131137	0.00328255	0.00532172	1.96297
CUB	Cuba	0	0	0.0198088	0.0198088	0.00586347	0.00615105	7.20621
CUW	Curacao	0.050143	0.0501432	0.0501432	0	0.0501432	0	0.0501432
CYP	Cyprus	0.033392	0.0211597	0.0466776	0.0255179	0.0338558	0.00807151	2.70847
CZE	Czech Republic	0	0	0.0351234	0.0351234	0.00360605	0.00698503	4.73113
DEU	Germany	0	0	0.0266724	0.0266724	0.00238756	0.00556129	14.576
DJI	Djibouti	0.193895	0.058973	0.559737	0.500764	0.214859	0.136805	10.0984
DMA	Dominica	0	0	0.00973824	0.00973824	0.00478655	0.0047894	0.0287193
DNK	Denmark	0	0	0.0128813	0.0128813	0.00384774	0.00523993	3.1436
DOM	Dominican Republic	0.011172	0	0.0238153	0.0238153	0.00913031	0.0066351	4.96689
DZA	Algeria	1.0313	0	10	10	1.46029	1.56548	27679.8
ECU	Ecuador	0	0	0.0871785	0.0871785	0.0050628	0.00985896	11.1331
EGY	Egypt	5.25799	0.0453768	10	9.95462	5.44344	3.98678	55996.7
ERI	Eritrea	0.095469	0	0.395475	0.395475	0.0944348	0.0767469	123.521
ESP	Spain	0.023136	0	0.311817	0.311817	0.0232461	0.0200712	147.264
EST	Estonia	0	0	0	0	0	0	0
ETH	Ethiopia	0.024809	0	0.393599	0.393599	0.0333051	0.0388138	412.75
FIN	Finland	0	0	0	0	0	0	0
FJI	Fiji	0.011172	0	0.0111727	0.0111727	0.0100751	0.0030808	1.89412
FLK	Falkland Islands	0	0	0	0	0	0	0
FRA	France	0.008885	0	0.035485	0.035485	0.00644879	0.0064412	52.0869
GAB	Gabon	0	0	0	0	0	0	0
GBR	United Kingdom	0	0	0.028267	0.028267	0.00181798	0.00565834	7.78822
GEO	Georgia	0.02674	0	0.0419075	0.0419075	0.0248206	0.0100282	4.26915
GGY	Guernsey	0	0	0	0	0	0	0
GHA	Ghana	0	0	0.0326162	0.0326162	0.00148508	0.00544201	3.50181
GIN	Gibraltar	0	0	0.0243333	0.0243333	0.000619106	0.00316911	0.671111
GLP	Guadeloupe	0	0	0.0146465	0.0146465	0.00475596	0.00608245	0.0618275
GMB	Gambia	0.015465	0	0.0304216	0.0304216	0.0109737	0.0103794	1.24003
GNB	Guinea-Bissau	0	0	0	0	0	0	0
GNQ	Equatorial Guinea	0	0	0	0	0	0	0
GRC	Greece	0.02892	0	0.0535444	0.0535444	0.0281487	0.00838506	31.4984
GRL	Greenland	0.013485	0.0121548	2.88379	2.87164	0.365639	0.795436	5154.41
GTM	Guatemala	0	0	0.0184673	0.0184673	0.00449914	0.00539883	5.18301
GUF	French Guiana	0	0	0.0128813	0.0128813	0.000328186	0.00202972	0.309151
GUY	Guyana	0	0	0.0128813	0.0128813	0.00050416	0.00249801	1.0305
HND	Honduras	0	0	0.0206549	0.0206549	0.00186788	0.0045522	2.20783
HRV	Croatia	0.011172	0	0.0261998	0.0261998	0.0106467	0.00826828	5.67471
HTI	Haiti	0.011172	0	0.0254516	0.0254516	0.00829922	0.00679567	2.58106
HUN	Hungary	0.015325	0	0.0279189	0.0279189	0.0133329	0.00686252	20.6926
IDN	Indonesia	0	0	0.0277531	0.0277531	0.00209554	0.00571049	42.2691
IMN	Isle of Man	0	0	0	0	0	0	0
IND	India	0.015821	0	0.559384	0.559384	0.0298882	0.0605141	1067.67
IRL	Ireland	0	0	0.0106801	0.0106801	0.000299282	0.00176261	0.373804
IRN	Iran	0.120936	0	0.99217	0.99217	0.160088	0.133482	2061.61
IRQ	Iraq	0.226143	0	0.664759	0.664759	0.240339	0.148052	1383.15
ISL	Iceland	0	0	0	0	0	0	0
ISR	Israel	0.0552	0.0212599	0.428542	0.407282	0.107264	0.105483	20.1656
ITA	Italy	0.01068	0	0.0439874	0.0439874	0.0114007	0.00959344	48.1906
JAM	Jamaica	0	0	0.0212349	0.0212349	0.00575316	0.00655569	0.592575
JEY	Jersey	0	0	0	0	0	0	0
JOR	Jordan	0.449134	0.0328672	1.68074	1.64787	0.496141	0.341275	473.319
JPN	Japan	0	0	0.0128813	0.0128813	0.00327824	0.00518927	9.83472
KAZ	Kazakhstan	0.055622	0	0.262743	0.262743	0.0703888	0.0465971	3019.75
KEN	Kenya	0.024459	0	0.216916	0.216916	0.0356752	0.0386754	206.845
KGZ	Kyrgyzstan	0.033743	0	0.102021	0.102021	0.0348416	0.0164996	9.86019
KHM	Cambodia	0	0	0.0146363	0.0146363	0.00134982	0.00362449	2.88052
KNA	Saint Kitts and Nevis	0.017561	0.0175617	0.0175617	0	0.0175617	0	0.0175617
KOR	South Korea	0	0	0.0106801	0.0106801	0.00298211	0.00479127	1.83698
KWT	Kuwait	0.41288	0	0.60199	0.60199	0.319669	0.17658	70.3271
LAO	Laos	0	0	0.00973824	0.00973824	6.90483e-05	0.000813769	0.193059
LBN	Lebanon	0.022024	0.0154964	0.0339587	0.0184623	0.0221288	0.00328734	2.1465
LBR	Liberia	0	0	0	0	0	0	0
LBY	Libya	4.2936	0.0254563	10	9.97454	4.90147	4.0386	94274.8
LCA	Saint Lucia	0	0	0.00924283	0.00924283	0.00462141	0.00462141	0.0184857
LKA	Sri Lanka	0.012913	0	0.0352758	0.0352758	0.00974603	0.00761744	7.25105
LSO	Lesotho	0.024905	0	0.0299239	0.0299239	0.0243434	0.00397078	2.38566
LTU	Lithuania	0	0	0.0129468	0.0129468	0.00349183	0.00572604	4.59873
LUX	Luxembourg	0	0	0.0111727	0.0111727	0.00364064	0.00443149	0.17111
LVA	Latvia	0	0	0.0128813	0.0128813	0.00132531	0.00391347	1.7905
MAR	Morocco	0.175399	0.0173692	1.73696	1.71959	0.261765	0.267179	1311.97
MDA	Moldova	0.015663	0	0.0390191	0.0390191	0.0199659	0.00860322	9.76333
MDG	Madagascar	0	0	0.029785	0.029785	0.00229885	0.0060124	9.64369
MEX	Mexico	0.027177	0	1.11743	1.11743	0.0582001	0.0979844	1194.85
MKD	The Former Yugoslav Republic of Macedonia	0.028843	0.0195292	0.0358014	0.0162721	0.0283244	0.00272745	1.69947
MLI	Mali	0.204718	0	5.42972	5.42972	0.503498	0.686957	6643.65
MLT	Malta	0.048469	0.0484695	0.0484695	0	0.0484695	0	0.096939
MMR	Myanmar	0	0	0.0213875	0.0213875	0.00102994	0.00384595	8.30438
MNE	Montenegro	0.011172	0.0111727	0.0194583	0.0082856	0.0131454	0.00352898	0.276054
MNG	Mongolia	0.064681	0	0.559131	0.559131	0.108678	0.103028	1828.18
MOZ	Mozambique	0	0	0.12132	0.12132	0.0158101	0.0304499	138.718
MRT	Mauritania	0.6597	0	3.56121	3.56121	0.83761	0.678812	7365.1
MTQ	Martinique	0	0	0.0128813	0.0128813	0.00416006	0.00517651	0.0416006
MWI	Malawi	0	0	0.0279667	0.0279667	0.00399785	0.00836699	3.50611
MYS	Malaysia	0	0	0.0131137	0.0131137	0.000179678	0.00149737	0.668941
MYT	Mayotte	0	0	0	0	0	0	0
NAM	Namibia	0.115074	0	10	10	0.177341	0.38492	1581
NCL	New Caledonia	0	0	0.0123657	0.0123657	0.00513589	0.00551966	1.08367
NER	Niger	0.476375	0	10	10	1.05214	1.30124	13361.2
NGA	Nigeria	0	0	0.240198	0.240198	0.0143778	0.0357295	125.964
NIC	Nicaragua	0	0	0.0180965	0.0180965	0.00198971	0.00447837	2.79355
NLD	Netherlands	0	0	0.0128813	0.0128813	0.00435681	0.00521004	2.67508
NOR	Norway	0	0	0	0	0	0	0
NPL	Nepal	0	0	0.0154141	0.0154141	0.00247354	0.00508724	3.39864
NZL	New Zealand	0	0	0.0339674	0.0339674	0.00142198	0.00437701	4.99113
OMN	Oman	0.670027	0.166571	1.79713	1.63056	0.728088	0.318517	2380.85
PAK	Pakistan	0.185274	0	1.64857	1.64857	0.248168	0.250374	1585.79
PAN	Panama	0	0	0.0153585	0.0153585	0.00117966	0.00349827	0.997992
PER	Peru	0	0	10	10	0.126837	0.761999	1197.97
PHL	Philippines	0	0	0.0277531	0.0277531	0.000720981	0.00350218	2.39222
PNG	Palau	0	0	0.0139982	0.0139982	0.00319024	0.00541244	14.7517
POL	Papua New Guinea	0	0	0.0367933	0.0367933	0.00553791	0.00979955	29.5946
PRI	Poland	0.01068	0	0.0192665	0.0192665	0.00889435	0.00516653	0.791597
PRK	Puerto Rico	0.01068	0	0.0162952	0.0162952	0.00915771	0.00446414	4.52391
PRT	North Korea	0	0	0.0493558	0.0493558	0.0092134	0.0150308	5.96107
PRY	Portugal	0.014898	0	0.0576537	0.0576537	0.0165079	0.0145071	83.1835
PSE	Paraguay	0.032654	0.0263543	0.0959584	0.0696041	0.039968	0.0161465	2.39808
QAT	Palestinian Territory	0.600918	0.138421	1.29289	1.15447	0.636354	0.2754	75.0898
ROU	Romania	0.019809	0	0.0507253	0.0507253	0.0195072	0.00964549	55.2443
RUS	Russian Federation	0.009914	0	0.11707	0.11707	0.00925665	0.0106107	2476.8
RWA	Rwanda	0	0	0.01399	0.01399	0.00115003	0.00363446	0.302457
SAU	Saudi Arabia	0.525891	0	2.5644	2.5644	0.695744	0.511681	13432
SDN	Sudan	0.261391	0	10	10	1.43266	2.50971	27845.2
SEN	Senegal	0	0	0.216578	0.216578	0.0339138	0.0555662	60.9771
SGP	Singapore	0	0	0	0	0	0	0
SLB	Solomon Islands	0.011172	0	0.0121548	0.0121548	0.00929238	0.0044542	2.45319
SLE	Sierra Leone	0	0	0.0110894	0.0110894	0.000405261	0.00208084	0.121984
SLV	El Salvador	0	0	0.0159983	0.0159983	0.00329165	0.00545206	0.81633
SMR	San Marino	0.014618	0.014619	0.014619	0	0.014619	0	0.014619
SOM	Somalia	0.137525	0	4.31763	4.31763	0.169895	0.176569	1198.44
SPM	Saint Pierre and Miquelon	0	0	0	0	0	0	0
SRB	Serbia	0.015414	0	0.032532	0.032532	0.015312	0.00789314	10.9787
SSD	South Sudan	0.015679	0	0.0737746	0.0737746	0.0129352	0.0135141	95.8631
STP	Sao Tome and Principe	0.015625	0	0.015625	0.015625	0.0104167	0.0073657	0.09375
SUR	Suriname	0	0	0.0131401	0.0131401	0.000486703	0.00246404	0.803547
SVK	Slovakia	0.01068	0	0.040959	0.040959	0.0104028	0.00843224	4.97254
SVN	Slovenia	0.011172	0	0.015625	0.015625	0.00986627	0.00441876	1.79566
SWE	Sweden	0	0	0.0137619	0.0137619	0.00159296	0.00378838	14.3558
SWZ	Swaziland	0.021533	0	0.0323497	0.0323497	0.0151713	0.012654	3.21631
SXM	Sint Maarten	0.01898	0.0189809	0.0189809	0	0.0189809	0	0.0189809
SYR	Syria	0.087681	0.0158133	0.367576	0.351763	0.126585	0.0881841	285.448
TCA	Turks and Caicos Islands	0.01726	0.01699	0.0174762	0.000486236	0.0172423	0.000198933	0.0517269
TCD	Chad	0.149418	0	10	10	0.689181	1.37925	7066.86
TGO	Togo	0	0	0.0305357	0.0305357	0.00227364	0.00569532	1.2073
THA	Thailand	0	0	0.018527	0.018527	0.000835853	0.00335603	5.01512
TJK	Tajikistan	0.034412	0.0127141	0.192989	0.180275	0.0356217	0.0182044	13.5719
TKM	Turkmenistan	0.112504	0	0.327413	0.327413	0.12697	0.0534703	743.026
TLS	Timor-Leste	0	0	0.022928	0.022928	0.00602137	0.00824921	0.385368
TTO	Trinidad and Tobago	0	0	0.0128813	0.0128813	0.00267347	0.00522401	0.141694
TUN	Tunisia	0.079808	0.00445321	1.86145	1.857	0.203074	0.289348	323.497
TUR	Turkey	0.031895	0	0.0773814	0.0773814	0.0288092	0.01464	160.756
TZA	Tanzania	0	0	0.0464347	0.0464347	0.00609915	0.00975633	61.6075
UGA	Uganda	0	0	0.0201092	0.0201092	0.000486102	0.00265752	1.04415
UKR	Ukraine	0.016126	0	0.0447104	0.0447104	0.017383	0.0135955	111.912
URY	Uruguay	0.010903	0	0.014824	0.014824	0.0102605	0.00295952	16.9811
USA	United States	0.0136	0	1.13527	1.13527	0.0288282	0.0587748	4196.89
UZB	Uzbekistan	0.116982	0	0.277783	0.277783	0.112498	0.057886	662.162
VCT	Saint Vincent and the Grenadines	0	0	0.00924283	0.00924283	0.00462141	0.00462141	0.00924283
VEN	Venezuela	0	0	0.0794678	0.0794678	0.00335225	0.00902075	33.1269
VIR	US Virgin Islands	0.016639	0.0166391	0.0166391	0	0.0166391	0	0.0166391
VNM	Vietnam	0	0	0.0137147	0.0137147	0.000941782	0.00327909	3.55429
VUT	Vanuatu	0.007537	0	0.0131137	0.0131137	0.00583131	0.00574935	0.66477
YEM	Yemen	0.318549	0.0313756	2.03563	2.00426	0.383563	0.244396	1589.87
ZAF	South Africa	0.047109	0	0.557128	0.557128	0.0657013	0.0573241	988.477
ZMB	Zambia	0	0	0.0351281	0.0351281	0.00603344	0.00983482	49.2269
ZWE	Zimbabwe	0	0	0.110561	0.110561	0.0192526	0.02493	80.3988

## Sheet: #9.Midpoint CFs country - II
		Units are dS/m*m3 soil/g salt in soil (electrical conductivity per g salt in 1 m3 soil)
ISO_3DIGIT	COUNTRY	MEDIAN	MIN	MAX	RANGE	MEAN	STD	SUM
AFG	Afghanistan	0.183034	0.015024	1.56648	1.55146	0.264584	0.251437	1150.41
AGO	Angola	0	0	0.603202	0.603202	0.00690857	0.0195048	99.4212
ALB	Albania	0.01929	0	0.0221207	0.0221207	0.0177504	0.00359684	6.12388
ARE	United Arab Emirates	0.422392	0.0743944	1.79888	1.72449	0.671166	0.507084	564.45
ARG	Argentina	0.029508	0	0.503654	0.503654	0.0634776	0.0720238	2269.45
ARM	Armenia	0.047731	0.0232405	0.0756386	0.0523982	0.0469105	0.0150767	4.4565
ATG	Antigua and Barbuda	0.01743	0.0174303	0.0217879	0.00435758	0.0188828	0.00205418	0.0566485
AUS	Australia	0.041492	0	0.312315	0.312315	0.0606157	0.064213	5501.54
AUT	Austria	0	0	0.0187708	0.0187708	0.00269807	0.00554006	2.74933
AZE	Azerbaijan	0.035733	0	0.0784144	0.0784144	0.03768	0.010807	28.1092
BDI	Burundi	0	0	0.0221043	0.0221043	0.00105744	0.00419172	0.311944
BEL	Belgium	0	0	0.0112007	0.0112007	0.000646948	0.00241969	0.358409
BEN	Benin	0	0	0.0562415	0.0562415	0.00149728	0.00683054	1.77727
BFA	Burkina Faso	0.019648	0	0.179965	0.179965	0.0200516	0.0235423	62.8417
BGD	Bangladesh	0	0	0.0134698	0.0134698	0.00212627	0.00401295	3.56576
BGR	Bulgaria	0.020785	0	0.0366067	0.0366067	0.0204935	0.0086841	28.7933
BHR	Bahrain	0.537549	0.509929	0.559558	0.0496284	0.536523	0.0181642	2.68261
BHS	Bahamas	0.012894	0	0.0196832	0.0196832	0.012408	0.00465997	1.35247
BIH	Bosnia and Herzegovina	0.0112	0	0.0230032	0.0230032	0.0135709	0.00409966	4.85837
BLR	Belarus	0	0	0.0235023	0.0235023	0.00799156	0.00999641	32.4138
BLZ	Belize	0	0	0.0132979	0.0132979	0.0040693	0.0051891	0.834207
BOL	Bolivia	0	0	0.399323	0.399323	0.0209525	0.0464973	214.344
BRA	Brazil	0	0	0.0598274	0.0598274	0.00186266	0.00711725	179.145
BRB	Barbados	0	0	0	0	0	0	0
BRN	Brunei Darussalam	0	0	0	0	0	0	0
BTN	Bhutan	0	0	0	0	0	0	0
BWA	Botswana	0.105226	0	0.288252	0.288252	0.0899158	0.0544095	645.146
CAF	Central African Republic	0	0	0.0350896	0.0350896	0.000858539	0.00401823	6.12739
CAN	Canada	0.01302	0	0.0631036	0.0631036	0.0118052	0.0109126	2172.88
CHE	Switzerland	0	0	0.0192901	0.0192901	0.00110846	0.00419378	0.350274
CHL	Chile	0.01638	0	10	10	0.363215	0.886564	1975.89
CHN	China	0.018042	0	1.84119	1.84119	0.0992421	0.176034	7431.84
CIV	C├┤te d'Ivoire	0	0	0.0494317	0.0494317	0.000701353	0.00400544	2.57326
CMR	Cameroon	0	0	0.0742973	0.0742973	0.00397236	0.0117298	20.6841
COD	Congo DRC	0	0	0.0261556	0.0261556	0.000161884	0.00168986	4.33721
COG	Congo	0	0	0	0	0	0	0
COL	Colombia	0	0	0.0453929	0.0453929	0.00186804	0.0052599	21.7048
COM	Comoros	0	0	0	0	0	0	0
CRI	Costa Rica	0	0	0.0132979	0.0132979	0.00325625	0.00527501	1.94724
CUB	Cuba	0	0	0.020087	0.020087	0.0058665	0.00615755	7.20993
CUW	Curacao	0.048841	0.0488414	0.0488414	0	0.0488414	0	0.0488414
CYP	Cyprus	0.033412	0.0213494	0.0472953	0.0259459	0.034083	0.00812645	2.72664
CZE	Czech Republic	0	0	0.0359536	0.0359536	0.0037108	0.00716108	4.86856
DEU	Germany	0	0	0.0264419	0.0264419	0.00239814	0.00556333	14.6406
DJI	Djibouti	0.188861	0.0559101	0.585179	0.529269	0.217616	0.143821	10.228
DMA	Dominica	0	0	0.00967492	0.00967492	0.00476136	0.00476379	0.0285681
DNK	Denmark	0	0	0.0134698	0.0134698	0.00392234	0.00534749	3.20456
DOM	Dominican Republic	0.0112	0	0.0249034	0.0249034	0.00920601	0.00669474	5.00807
DZA	Algeria	1.04509	0	10	10	1.50592	1.63643	28544.8
ECU	Ecuador	0	0	0.0847399	0.0847399	0.00504643	0.00977556	11.0971
EGY	Egypt	5.30919	0.0434726	10	9.95653	5.45841	3.98942	56150.7
ERI	Eritrea	0.097777	0	0.401028	0.401028	0.095263	0.0774364	124.604
ESP	Spain	0.023284	0	0.319933	0.319933	0.0232942	0.0200848	147.569
EST	Estonia	0	0	0	0	0	0	0
ETH	Ethiopia	0.025173	0	0.41149	0.41149	0.0336267	0.0389071	416.736
FIN	Finland	0	0	0	0	0	0	0
FJI	Fiji	0.0112	0	0.0112007	0.0112007	0.0101209	0.00309272	1.90273
FLK	Falkland Islands	0	0	0	0	0	0	0
FRA	France	0.009441	0	0.0351783	0.0351783	0.00657053	0.00648324	53.0702
GAB	Gabon	0	0	0	0	0	0	0
GBR	United Kingdom	0	0	0.0289351	0.0289351	0.00183389	0.0057344	7.85639
GEO	Georgia	0.026257	0	0.0415453	0.0415453	0.0246364	0.00988773	4.23747
GGY	Guernsey	0	0	0	0	0	0	0
GHA	Ghana	0	0	0.0326162	0.0326162	0.00146391	0.00534934	3.45189
GIN	Gibraltar	0	0	0.0243333	0.0243333	0.00060901	0.00311992	0.660166
GLP	Guadeloupe	0	0	0.0153157	0.0153157	0.00486144	0.0062437	0.0631987
GMB	Gambia	0.016004	0	0.0304216	0.0304216	0.0111967	0.0104662	1.26523
GNB	Guinea-Bissau	0	0	0	0	0	0	0
GNQ	Equatorial Guinea	0	0	0	0	0	0	0
GRC	Greece	0.028716	0	0.0530816	0.0530816	0.0279742	0.00824424	31.3032
GRL	Greenland	0.013813	0.0124502	2.95388	2.94143	0.374525	0.814767	5279.68
GTM	Guatemala	0	0	0.0185879	0.0185879	0.00456124	0.0054716	5.25455
GUF	French Guiana	0	0	0.0134698	0.0134698	0.00034318	0.00212245	0.323276
GUY	Guyana	0	0	0.0134698	0.0134698	0.000527195	0.00261214	1.07759
HND	Honduras	0	0	0.0215986	0.0215986	0.00189393	0.00462765	2.23862
HRV	Croatia	0.0112	0	0.0259734	0.0259734	0.0106548	0.00817894	5.679
HTI	Haiti	0.0112	0	0.0266145	0.0266145	0.00836627	0.00687951	2.60191
HUN	Hungary	0.015238	0	0.0276776	0.0276776	0.0134336	0.00695619	20.849
IDN	Indonesia	0	0	0.0284091	0.0284091	0.00212447	0.00580966	42.8527
IMN	Isle of Man	0	0	0	0	0	0	0
IND	India	0.015921	0	0.58481	0.58481	0.030479	0.0630572	1088.77
IRL	Ireland	0	0	0.0107759	0.0107759	0.000301966	0.00177841	0.377155
IRN	Iran	0.116843	0	0.99217	0.99217	0.158161	0.136558	2036.79
IRQ	Iraq	0.225249	0	0.680471	0.680471	0.238099	0.14777	1370.26
ISL	Iceland	0	0	0	0	0	0	0
ISR	Israel	0.052551	0.0215772	0.428542	0.406965	0.107505	0.105489	20.2109
ITA	Italy	0.010775	0	0.0436073	0.0436073	0.0115005	0.0096439	48.6124
JAM	Jamaica	0	0	0.0222051	0.0222051	0.00584319	0.00669171	0.601849
JEY	Jersey	0	0	0	0	0	0	0
JOR	Jordan	0.423329	0.03278	1.72046	1.68768	0.473763	0.336364	451.969
JPN	Japan	0	0	0.0134698	0.0134698	0.00335309	0.00532073	10.0593
KAZ	Kazakhstan	0.05503	0	0.262743	0.262743	0.0696411	0.0460768	2987.67
KEN	Kenya	0.024496	0	0.222044	0.222044	0.035813	0.0388988	207.644
KGZ	Kyrgyzstan	0.032375	0	0.100469	0.100469	0.0337164	0.0162579	9.54173
KHM	Cambodia	0	0	0.015305	0.015305	0.00139218	0.00374371	2.9709
KNA	Saint Kitts and Nevis	0.017719	0.0177192	0.0177192	0	0.0177192	0	0.0177192
KOR	South Korea	0	0	0.0107759	0.0107759	0.00300884	0.00483423	1.85345
KWT	Kuwait	0.41288	0	0.616219	0.616219	0.318651	0.177192	70.1033
LAO	Laos	0	0	0.00967492	0.00967492	6.90382e-05	0.000813384	0.193031
LBN	Lebanon	0.022207	0.0155976	0.0323287	0.0167311	0.0219796	0.00294054	2.13202
LBR	Liberia	0	0	0	0	0	0	0
LBY	Libya	4.36557	0.0262041	10	9.9738	4.93903	4.05106	94997.2
LCA	Saint Lucia	0	0	0.00921829	0.00921829	0.00460914	0.00460914	0.0184366
LKA	Sri Lanka	0.012703	0	0.0361096	0.0361096	0.00965056	0.00759225	7.18002
LSO	Lesotho	0.025255	0	0.0303441	0.0303441	0.0246853	0.00402654	2.41916
LTU	Lithuania	0	0	0.0135383	0.0135383	0.00365137	0.00598766	4.80885
LUX	Luxembourg	0	0	0.0112007	0.0112007	0.00385405	0.0046853	0.18114
LVA	Latvia	0	0	0.0134698	0.0134698	0.00138587	0.00409228	1.87231
MAR	Morocco	0.180449	0.0191828	1.80136	1.78218	0.265283	0.271114	1329.6
MDA	Moldova	0.016123	0	0.0386819	0.0386819	0.0202072	0.008317	9.88132
MDG	Madagascar	0	0	0.0296402	0.0296402	0.00230286	0.00601955	9.6605
MEX	Mexico	0.026749	0	1.05039	1.05039	0.0569522	0.0939882	1169.23
MKD	The Former Yugoslav Republic of Macedonia	0.028843	0.0193605	0.035492	0.0161315	0.0283006	0.00271859	1.69804
MLI	Mali	0.2063	0	5.67653	5.67653	0.519429	0.714792	6853.87
MLT	Malta	0.04805	0.0480506	0.0480506	0	0.0480506	0	0.0961013
MMR	Myanmar	0	0	0.0210398	0.0210398	0.00101458	0.0037913	8.18054
MNE	Montenegro	0.0112	0.0112007	0.0192901	0.0080894	0.0131268	0.00344542	0.275662
MNG	Mongolia	0.063684	0	0.559131	0.559131	0.107759	0.103153	1812.73
MOZ	Mozambique	0	0	0.125818	0.125818	0.0163199	0.0315408	143.191
MRT	Mauritania	0.681327	0	3.69326	3.69326	0.868624	0.711457	7637.81
MTQ	Martinique	0	0	0.0134698	0.0134698	0.0042038	0.00526215	0.042038
MWI	Malawi	0	0	0.0286536	0.0286536	0.0041495	0.00868122	3.63911
MYS	Malaysia	0	0	0.0134698	0.0134698	0.000186997	0.00155864	0.696192
MYT	Mayotte	0	0	0	0	0	0	0
NAM	Namibia	0.115909	0	10	10	0.178309	0.398316	1589.63
NCL	New Caledonia	0	0	0.0124766	0.0124766	0.00516244	0.00554785	1.08927
NER	Niger	0.493289	0	10	10	1.0805	1.3355	13721.2
NGA	Nigeria	0	0	0.245875	0.245875	0.0145152	0.0364107	127.167
NIC	Nicaragua	0	0	0.0182587	0.0182587	0.00198811	0.00448244	2.7913
NLD	Netherlands	0	0	0.0134698	0.0134698	0.00450106	0.00539528	2.76365
NOR	Norway	0	0	0	0	0	0	0
NPL	Nepal	0	0	0.0161183	0.0161183	0.0025853	0.00531756	3.5522
NZL	New Zealand	0	0	0.0355114	0.0355114	0.00145727	0.00449328	5.11502
OMN	Oman	0.670027	0.163365	1.87882	1.71546	0.72861	0.319145	2382.55
PAK	Pakistan	0.186948	0	1.72351	1.72351	0.253145	0.257583	1617.59
PAN	Panama	0	0	0.0151088	0.0151088	0.00116726	0.00346038	0.987505
PER	Peru	0	0	10	10	0.131663	0.788408	1243.55
PHL	Philippines	0	0	0.0284091	0.0284091	0.000728463	0.00356131	2.41704
PNG	Palau	0	0	0.0146377	0.0146377	0.00331054	0.0056302	15.3079
POL	Papua New Guinea	0	0	0.037663	0.037663	0.00552406	0.0097929	29.5206
PRI	Poland	0.010775	0	0.0201468	0.0201468	0.00899202	0.00525287	0.800289
PRK	Puerto Rico	0.010775	0	0.0161717	0.0161717	0.00922784	0.00448425	4.55855
PRT	North Korea	0	0	0.0489292	0.0489292	0.00917564	0.0149305	5.93664
PRY	Portugal	0.015515	0	0.0561569	0.0561569	0.0165416	0.0142075	83.3533
PSE	Paraguay	0.032123	0.0267477	0.0959584	0.0692107	0.0394042	0.0160704	2.36425
QAT	Palestinian Territory	0.600918	0.132612	1.35166	1.21905	0.643745	0.293555	75.962
ROU	Romania	0.020228	0	0.050287	0.050287	0.019674	0.00951954	55.7169
RUS	Russian Federation	0.010298	0	0.116058	0.116058	0.00914366	0.0104634	2446.57
RWA	Rwanda	0	0	0.0141865	0.0141865	0.0011835	0.0037374	0.311261
SAU	Saudi Arabia	0.533867	0	2.68097	2.68097	0.711602	0.537657	13738.2
SDN	Sudan	0.260235	0	10	10	1.43493	2.51312	27889.4
SEN	Senegal	0	0	0.221697	0.221697	0.0342635	0.0567529	61.6058
SGP	Singapore	0	0	0	0	0	0	0
SLB	Solomon Islands	0.0112	0	0.0124502	0.0124502	0.00937245	0.00450247	2.47433
SLE	Sierra Leone	0	0	0.0109266	0.0109266	0.00039931	0.00205028	0.120192
SLV	El Salvador	0	0	0.016223	0.016223	0.00330657	0.0054835	0.82003
SMR	San Marino	0.014824	0.0148243	0.0148243	0	0.0148243	0	0.0148243
SOM	Somalia	0.138789	0	4.51388	4.51388	0.17052	0.179988	1202.85
SPM	Saint Pierre and Miquelon	0	0	0	0	0	0	0
SRB	Serbia	0.015618	0	0.0322508	0.0322508	0.015296	0.00783221	10.9672
SSD	South Sudan	0.016449	0	0.0755184	0.0755184	0.0130979	0.0137177	97.0685
STP	Sao Tome and Principe	0.015625	0	0.015625	0.015625	0.0104167	0.0073657	0.09375
SUR	Suriname	0	0	0.0137404	0.0137404	0.000503913	0.00255113	0.831961
SVK	Slovakia	0.011105	0	0.0419271	0.0419271	0.0105615	0.00853814	5.04839
SVN	Slovenia	0.0112	0	0.015625	0.015625	0.00989139	0.00441961	1.80023
SWE	Sweden	0	0	0.0138853	0.0138853	0.0016024	0.00381221	14.4408
SWZ	Swaziland	0.021345	0	0.032804	0.032804	0.0151977	0.0127084	3.22192
SXM	Sint Maarten	0.019151	0.0191511	0.0191511	0	0.0191511	0	0.0191511
SYR	Syria	0.084568	0.0157105	0.345521	0.329811	0.123616	0.0856938	278.754
TCA	Turks and Caicos Islands	0.01834	0.0180525	0.0185691	0.00051664	0.0183206	0.000211372	0.0549617
TCD	Chad	0.15168	0	10	10	0.706856	1.41649	7248.1
TGO	Togo	0	0	0.0295804	0.0295804	0.00222274	0.00557904	1.18027
THA	Thailand	0	0	0.0193735	0.0193735	0.000860762	0.00345935	5.16457
TJK	Tajikistan	0.033035	0.0127971	0.19755	0.184753	0.0348181	0.0183001	13.2657
TKM	Turkmenistan	0.114403	0	0.327413	0.327413	0.127358	0.0537071	745.302
TLS	Timor-Leste	0	0	0.0239756	0.0239756	0.00612837	0.00844841	0.392216
TTO	Trinidad and Tobago	0	0	0.0134698	0.0134698	0.00279562	0.0054627	0.148168
TUN	Tunisia	0.078893	0.00424674	1.94606	1.94181	0.209326	0.302949	333.457
TUR	Turkey	0.030893	0	0.0767127	0.0767127	0.0279685	0.0141943	156.064
TZA	Tanzania	0	0	0.0475323	0.0475323	0.0061727	0.00991109	62.3504
UGA	Uganda	0	0	0.0203916	0.0203916	0.000496019	0.00271088	1.06545
UKR	Ukraine	0.0166	0	0.044324	0.044324	0.0173721	0.0134331	111.842
URY	Uruguay	0.01085	0	0.0150322	0.0150322	0.0102423	0.00294075	16.951
USA	United States	0.013622	0	1.06715	1.06715	0.0281744	0.0558228	4101.71
UZB	Uzbekistan	0.115512	0	0.277783	0.277783	0.112085	0.0580237	659.73
VCT	Saint Vincent and the Grenadines	0	0	0.00921829	0.00921829	0.00460914	0.00460914	0.00921829
VEN	Venezuela	0	0	0.0782585	0.0782585	0.00330522	0.00880984	32.6622
VIR	US Virgin Islands	0.016788	0.0167883	0.0167883	0	0.0167883	0	0.0167883
VNM	Vietnam	0	0	0.0139073	0.0139073	0.000955796	0.00333259	3.60718
VUT	Vanuatu	0.007512	0	0.0132979	0.0132979	0.00589182	0.00582506	0.671667
YEM	Yemen	0.321822	0.0328091	2.12816	2.09535	0.385769	0.247904	1599.01
ZAF	South Africa	0.047084	0	0.564952	0.564952	0.0652788	0.057139	982.12
ZMB	Zambia	0	0	0.0345569	0.0345569	0.00617197	0.0100087	50.3571
ZWE	Zimbabwe	0	0	0.11466	0.11466	0.0195777	0.0254439	81.7563

[truncated: 3 more sheets: #10.Damage CFs country - FI, #11.Damage CFs country - II, #12. Global CFs ]
